# Supplementary material for: Cyclopropane formation under frustrated Lewis pair conditions
Source: Royal Society of Chemistry journal article supplement (doi:10.1039/c5cc09585a), 2015-12-23
Supplement: c5cc09585a1.pdf [file c5cc09585a1.pdf]

## Cyclopropane Formation under Frustrated Lewis Pair Conditions

Sergei Krupski, Gerald Kehr, Constantin G. Daniliuc,<sup>\$</sup> Gerhard Erker\*

Organisch-Chemisches Institut (OCI), Universität Münster, Corrensstraße 40, 48149 Münster, Germany

<sup>\$</sup> X-ray crystal structure analysis

### Supporting Information

**Materials and Methods.** All syntheses involving air- and moisture sensitive compounds were carried out using standard Schlenk-type glassware (or in a glove box) under an atmosphere of argon. Solvents were dried and stored under an argon atmosphere. NMR spectra were recorded on a *Bruker* AV 300 (<sup>1</sup>H: 300 MHz, <sup>13</sup>C: 76 MHz, <sup>31</sup>P: 122 MHz, <sup>11</sup>B: 96 MHz, <sup>19</sup>F: 282 MHz), a *Bruker* AV 400 (<sup>1</sup>H: 400 MHz, <sup>13</sup>C: 101 MHz, <sup>31</sup>P: 162 MHz), a *Varian* VNMR 500 MHz (<sup>1</sup>H: 500 MHz, <sup>13</sup>C: 126 MHz, <sup>19</sup>F: 470 MHz, <sup>11</sup>B: 160 MHz, <sup>31</sup>P: 202 MHz) and on a *Agilent* DD2-600 MHz (<sup>1</sup>H: 600 MHz, <sup>13</sup>C: 151 MHz, <sup>19</sup>F: 564 MHz, <sup>11</sup>B: 192 MHz, <sup>31</sup>P: 243 MHz). <sup>1</sup>H NMR and <sup>13</sup>C NMR: chemical shifts  $\delta$  are given relative to TMS and referenced to the solvent signal. <sup>19</sup>F NMR: chemical shifts  $\delta$  are given relative to CFCl<sub>3</sub> ( $\delta$  = 0, external reference), <sup>11</sup>B NMR: chemical shifts  $\delta$  are given relative to BF<sub>3</sub>·Et<sub>2</sub>O ( $\delta$  = 0, external reference), <sup>31</sup>P NMR: chemical shifts  $\delta$  are given relative to H<sub>3</sub>PO<sub>4</sub> (85% in D<sub>2</sub>O) ( $\delta$  = 0, external reference). NMR assignments were supported by additional 2D NMR experiments. The splitting patterns in the NMR spectra are reported as follows: s = singlet, d = doublet, t = triplet, q = quartet, m = multiplet, br = broad signal. Coupling constants are

given in Hertz (Hz). High Resolution Mass Spectrometry (HRMS) was recorded on Orbitrap (*ThermoScientific LTQ XL*) and MicroTof (*Bruker Daltonics*). Elemental analyses were performed on a *Elementar Vario El III*. X-Ray diffraction: Data sets for the compounds **9** and **12** were collected with a D8 Venture Dual Source 100 CMOS diffractometer. Programs used: data collection: APEX2 V2014.5-0 (Bruker AXS Inc., 2014); cell refinement: SAINT V8.34A (Bruker AXS Inc., 2013); data reduction: SAINT V8.34A (Bruker AXS Inc., 2013); absorption correction, SADABS V2014/2 (Bruker AXS Inc., 2014); structure solution SHELXT-2014 (Sheldrick, 2014); structure refinement SHELXL-2014 (Sheldrick, 2014). For the compounds **V** and **10** data sets were collected with a Nonius KappaCCD diffractometer. Programs used: data collection, COLLECT (R. W. W. Hooft, Bruker AXS, 2008, Delft, The Netherlands); data reduction Denzo-SMN (Z. Otwinowski, W. Minor, *Methods Enzymol.* 1997, **276**, 307); absorption correction, Denzo (Z. Otwinowski, D. Borek, W. Majewski, W. Minor, *Acta Crystallogr.* 2003, **A59**, 228); structure solution SHELXS-97 (G. M. Sheldrick, *Acta Crystallogr.* 1990, **A46**, 467); structure refinement SHELXL-97 (G. M. Sheldrick, *Acta Crystallogr.* 2008, **A64**, 112). *R*-values are given for observed reflections, and  $wR^2$  values are given for all reflections. *Exceptions and special features*: Compound **9** crystallized with a disordered over two positions cyclopropane group. Several restraints (SADI, SAME, ISOR and SIMU) were used in order to improve refinement stability. For the compounds **10** and **12** a badly disordered dichloromethane molecule and one half toluene molecule, respectively, were found in the asymmetrical unit and could not be satisfactorily refined. The program SQUEEZE (A. L. Spek, *J. Appl. Cryst.*, 2003, **36**, 7) was therefore used to remove mathematically the effect of the solvent. The quoted formula and derived parameters are not included the squeezed solvent molecules. CCDC deposition numbers are 1419592 to 1419595.

**Starting materials.** Bis(pentafluorophenyl)borane  $\text{HB}(\text{C}_6\text{F}_5)_2$  [(a) R. E. von H. Spence, W. E. Piers, Y. E. Sun, M. Parvez, L. R. MacGillivray and M. J. Zaworotko, *Organometallics*, 1998, **17**, 2459; (b) D. J. Parks, W. E. Piers and G. P. A. Yap, *Organometallics*, 1998, **17**, 5492; (c) D. J. Parks, R. E. von H. Spence and W. E. Piers, *Angew. Chem., Int. Ed. Engl.*, 1995, **34**, 809]. Tris(pentafluorophenyl)borane  $\text{B}(\text{C}_6\text{F}_5)_3$  was purchased. Allyldimesitylphosphane was synthesized as reported in the following literature [P. Spies, G. Kehr, K. Bergander, B. Wibbeling, R. Fröhlich and G. Erker, *Dalton Trans.*, 2009, 1534].

---

## Preparation of phosphinobutenols.

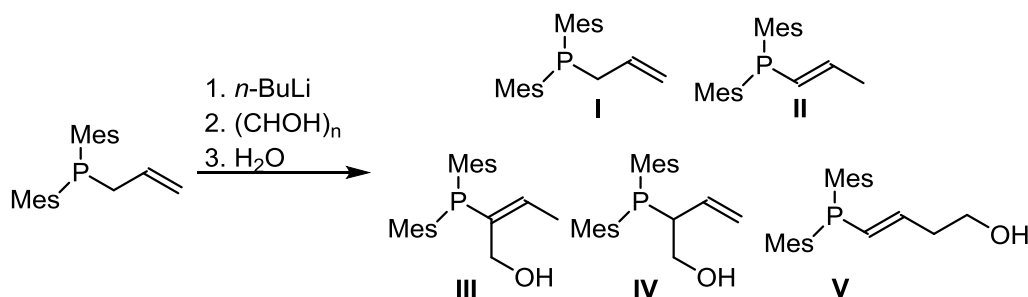

*1<sup>st</sup> Experiment:* Allyldimesitylphosphane (**I**) (3.24 g, 10.44 mmol) was dissolved in dry THF (50 mL). The solution was cooled to  $-78\text{ }^\circ\text{C}$  and  $n\text{-BuLi}$  (1.6 M in  $n$ -hexane) (6.53 mL, 10.44 mmol) was added slowly. After stirring at this temperature for 30 min, paraformaldehyde  $(\text{CHOH})_n$  (626 mg, 20.87 mmol) was added at once under an atmosphere of argon. Then the dry ice bath was removed and the reaction mixture was stirred first for 48 h at ambient temperature and then to complete the reaction for 2 h at  $60\text{ }^\circ\text{C}$ . The reaction was quenched with distilled  $\text{H}_2\text{O}$  (20 mL) and the organic layer was extracted with  $\text{CH}_2\text{Cl}_2$  ( $1 \times 50\text{ mL}$ ,  $2 \times 25\text{ mL}$ ) and subsequently the combined organic phases were dried with  $\text{Na}_2\text{SO}_4$ . After removing all volatiles by using a rotary evaporator a yellow oil (3.8 g) was obtained. Further purification was carried out by column chromatography using silica gel (50 cm x  $\varnothing$  4 cm, eluent: ethyl acetate/  $n$ -pentane 3:7 and 1%  $\text{NEt}_3$ ): three fractions were obtained, each dried *in vacuo*.

*Fraction 1:* Yellow oil (1.08 g), a mixture, which contains mostly allyldimesitylphosphane (**I**) and  $(E)$ -(prop-1-enyl)dimesitylphosphane (**II**) [ $R_f$ : 0.95, (4:1 ( $^1\text{H}$ ))].

*Fraction 2:* Yellow oil (0.7 g), a mixture of compounds 2-(dimesitylphosphino)but-2-en-1-ol (**III**) and 2-(dimesitylphosphino)but-3-en-1-ol (**IV**) [ $R_f$ : 0.62, (2:1 ( $^1\text{H}$ ))].

*Fraction 3*: Slightly yellow oil (1.20 g, 34%), (*E*)-4-(dimesitylphosphino)but-3-en-1-ol (**V**) [ $R_f$ : 0.35], which crystallized upon standing for two weeks as a white crystalline solid.

(*E*)-(Prop-1-enyl)dimesitylphosphane (**II**) was obtained by column chromatography of *fraction 1* on silica gel (eluent: CH<sub>2</sub>Cl<sub>2</sub>/ cyclohexane 3:10) as a yellow oil (0.08 g, 2%).

2-(Dimesitylphosphino)but-2-en-1-ol (**III**) was obtained by column chromatography of *fraction 2* [ $R_f$ : 0.6] on silica gel (eluent: ethylacetate/ *n*-pentane 1:5) as a colorless oil (0.16 g, 5%).

**HRMS** (MicroTof):  $[M+H]^+$  (C<sub>22</sub>H<sub>29</sub>OPH<sup>+</sup>): Calcd.: 314.2034, Found: 314.2029.

**Elemental analysis**: Calcd. for C<sub>22</sub>H<sub>29</sub>OP: C, 77.62; H, 8.59. Found C, 76.81; H, 8.31.

2-(Dimesitylphosphino)but-3-en-1-ol (**IV**) was obtained by column chromatography of *fraction 2* on silica gel [ $R_f$ : 0.48] (eluent: ethylacetate/ *n*-pentane 1:5) as a colorless oil (0.33 g, 9%).

2<sup>nd</sup> Experiment: A solution of allyldimesitylphosphane (**I**) (1 g, 3.22 mmol) in THF (20 mL) was precooled to -78 °C and *n*-BuLi (1.6 M in *n*-hexane) (2.11 mL, 3.38 mmol) was added. After 30 min stirring, *p*-formaldehyde (CHOH)<sub>n</sub> (0.1 g, 3.38 mmol) was added quickly and the mixture was warmed to 0 °C. After 1 h stirring, HCl (1 M, 10 mL) and ethylacetate (50 mL) were added to the reaction mixture. Then the organic layer was separated and washed twice with distilled H<sub>2</sub>O (2 × 50 mL), dried with Na<sub>2</sub>SO<sub>4</sub> and all volatiles were removed using a rotary evaporator. The obtained colorless oil was purified by column chromatography (see *1<sup>st</sup> Experiment*). Only (*E*)-4-(dimesitylphosphino)but-3-en-1-ol (**V**) was isolated as a slight yellow oil which crystallized upon several days as a white crystalline solid (0.2 g, 18%).

**Elemental analysis**: Calcd. for C<sub>22</sub>H<sub>29</sub>OP: C, 77.62; H, 8.59. Found: C, 76.98; H, 8.40.

3<sup>rd</sup> Experiment: *n*-BuLi (1.6M in *n*-hexane) (4.23 mL, 6.76 mmol) was added dropwise to a solution of allyldimesitylphosphane (**I**) (2 g, 6.44 mmol) in THF (40 mL) at –78 °C. After 1 h, *p*-formaldehyde (0.2 g, 6.76 mmol) was added. The temperature of solution was allowed to rise to ambient temperature and stirring was continued for 16 h. Then the solution was heated for 1 h at 65 °C. Subsequently a mixture of H<sub>2</sub>O (30 mL) and of HCl in diethyl ether (2M) (3.45 mL, 6.9 mmol) was added. After 10 min, the reaction mixture was extracted four times with CH<sub>2</sub>Cl<sub>2</sub> (4 × 30 mL) and the combined organic phases were dried with Na<sub>2</sub>SO<sub>4</sub>. Further workup was carried out as described in 1<sup>st</sup> Experiment.

*Fraction 1:* Yellow oil (0.3 g), mixture of allyldimesitylphosphane (**I**) and (*E*)-(prop-1-enyl)dimesitylphosphane (**II**).

*Fraction 2:* Colorless oil (0.50 g), 2-(dimesitylphosphino)but-3-en-1-ol (**IV**). Colorless oil (0.50 g, 23%).

**HRMS** (MicroTof): [M+H]<sup>+</sup> (C<sub>22</sub>H<sub>29</sub>OPH<sup>+</sup>): Calcd.: 314.2034, Found: 314.2027.

**Elemental analysis:** Calcd. for C<sub>22</sub>H<sub>29</sub>OP: C, 77.62; H, 8.59. Found: C, 76.92; H, 8.58.

*Fraction 3:* Slightly yellow oil, (*E*)-4-(dimesitylphosphino)but-3-en-1-ol (**V**), which completely crystallized after storing for 2 days at ambient temperature. The quality of the obtained crystals (1.02 g, 47%) was suitable for the X-ray crystal structure analysis.

[*Comment:* the phosphanyl alcohols seem to react with air, therefore the column purification should be done quickly. All fractions were collected on air, followed by fast drying *in vacuo*.]

**(E)-(Prop-1-enyl)dimesitylphosphane (II).** From 1<sup>st</sup> Experiment: Yellow oil (0.08 g, 2%).

The solution of the oil in CDCl<sub>3</sub> was admixed with some compounds not identified yet.

**<sup>1</sup>H NMR** (300 MHz, 299 K, CDCl<sub>3</sub>): δ = 6.78 (m, 4H, *m*-Mes), 6.58 (ddq, <sup>3</sup>*J*<sub>HH</sub> = 16.2 Hz, <sup>2</sup>*J*<sub>PH</sub> = 12.2 Hz, <sup>4</sup>*J*<sub>HH</sub> = 1.6 Hz, 1H, PCH), 6.00 (ddq, <sup>3</sup>*J*<sub>HH</sub> = 16.2 Hz, <sup>3</sup>*J*<sub>PH</sub> = 14.7 Hz, <sup>3</sup>*J*<sub>HH</sub> = 6.5 Hz, 1H, =CH), 2.25 (s, 12H, *o*-CH<sub>3</sub><sup>Mes</sup>), 2.23 (s, 6H, *p*-CH<sub>3</sub><sup>Mes</sup>), 1.81 (ddd, <sup>3</sup>*J*<sub>HH</sub> = 6.5 Hz, <sup>4</sup>*J*<sub>HH</sub> = 1.6 Hz, <sup>4</sup>*J*<sub>PH</sub> = 0.5 Hz, 3H, CH<sub>3</sub>).

**<sup>31</sup>P{<sup>1</sup>H} NMR** (121 MHz, 299 K, CDCl<sub>3</sub>): δ = -25.4 (ν<sub>1/2</sub> ~ 1 Hz).

**<sup>31</sup>P NMR** (121 MHz, 299 K, CDCl<sub>3</sub>): δ = -25.4 (br t, *J*<sub>PH</sub> ~ 13 Hz).

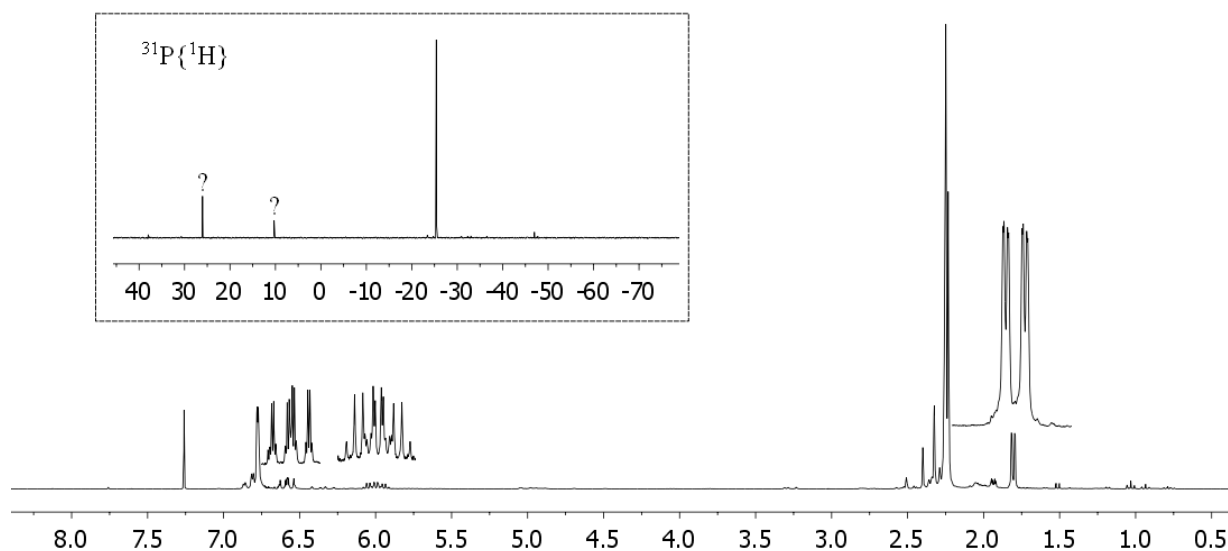

**<sup>1</sup>H NMR** (300 MHz, 299 K, CDCl<sub>3</sub>) and **<sup>31</sup>P{<sup>1</sup>H} NMR** (121 MHz, 299 K, CDCl<sub>3</sub>) spectra of compound **II**. [? not identified yet].

**2-(Dimesitylphosphino)but-2-en-1-ol (III).** From 1<sup>st</sup> Experiment: Colorless oil (0.16 g, 5%).

The solution of the oil in CDCl<sub>3</sub> was admixed with 2-(dimesitylphosphino)but-3-en-1-ol (IV) (ca. 10% (<sup>31</sup>P)).

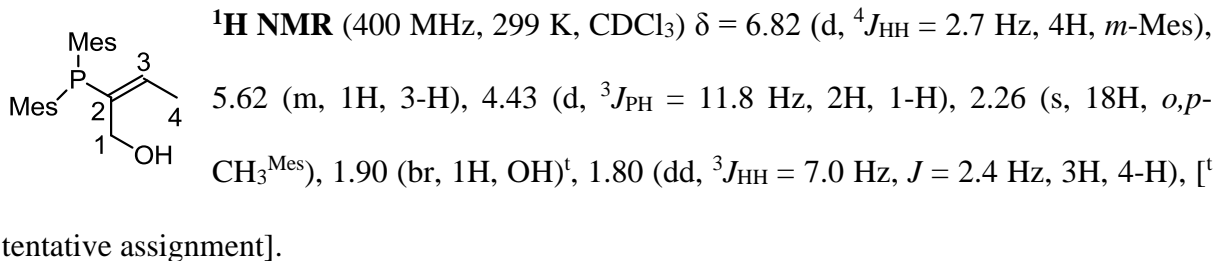

<sup>13</sup>C{<sup>1</sup>H} NMR (101 MHz, 299 K, CDCl<sub>3</sub>): δ = 142.7 (d, <sup>2</sup>J<sub>PC</sub> = 14.9 Hz, *o*-Mes), 137.9 (br, *p*-Mes), 136.3 (d, <sup>1</sup>J<sub>PC</sub> = 13.1 Hz, C2), 133.6 (br, C3), 129.8 (d, <sup>3</sup>J<sub>PC</sub> = 3.7 Hz, *m*-Mes), 129.7 (br d, <sup>1</sup>J<sub>PC</sub> ~ 20 Hz, *i*-Mes), 61.6 (d, <sup>2</sup>J<sub>PC</sub> = 30.9 Hz, C1), 22.3 (d, <sup>3</sup>J<sub>PC</sub> = 15.2 Hz, *o*-CH<sub>3</sub><sup>Mes</sup>), 20.8 (*p*-CH<sub>3</sub><sup>Mes</sup>), 15.2 (d, <sup>3</sup>J<sub>PC</sub> = 4.4 Hz, C4).

<sup>1</sup>H,<sup>1</sup>H GCOSY (400 MHz/ 400 MHz, 299 K, CDCl<sub>3</sub>) [selected traces]: δ<sup>1</sup>H/ δ<sup>1</sup>H = 5.61/ 1.80 (3-H/ 4-H), 1.80/ 4.43, 5.61 (4-H/ 1-H, 3-H)

<sup>1</sup>H,<sup>13</sup>C GHSQC (400 MHz/ 101 MHz, 299 K, CDCl<sub>3</sub>): δ<sup>1</sup>H/ δ<sup>13</sup>C = 6.82/ 129.8 (*m*-Mes), 5.62/ 133.6 (C3), 4.43/ 61.6 (C1), 2.26/ 22.3 (*o*-CH<sub>3</sub><sup>Mes</sup>), 2.26/ 20.8 (*p*-CH<sub>3</sub><sup>Mes</sup>), 1.80/ 15.2 (C4).

<sup>1</sup>H,<sup>13</sup>C GHMBC (400 MHz/ 101 MHz, 299 K, CDCl<sub>3</sub>) [selected traces]: δ<sup>1</sup>H/ δ<sup>13</sup>C = 6.82/ 142.7, 129.8, 129.7 (*m*-Mes/ *o*-Mes, *m*-Mes, *i*-Mes), 2.26/ 142.7, 129.8, 129.7 (*o*-CH<sub>3</sub><sup>Mes</sup>/ *o*-Mes, *m*-Mes, *i*-Mes), 1.80/ 136.3, 133.6 (4-H/ C2, C3).

<sup>31</sup>P{<sup>1</sup>H} NMR (162 MHz, 299 K, CDCl<sub>3</sub>): δ = -25.4 (ν<sub>1/2</sub> ~ 50 Hz).

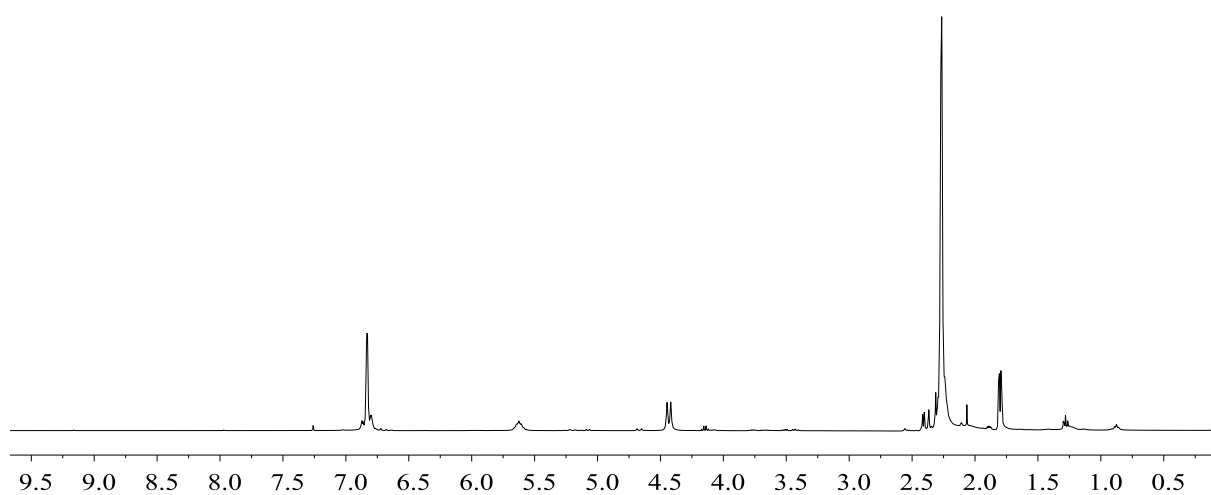

$^1\text{H}$  NMR (400 MHz, 299 K,  $\text{CDCl}_3$ ) spectrum of compound **III**.

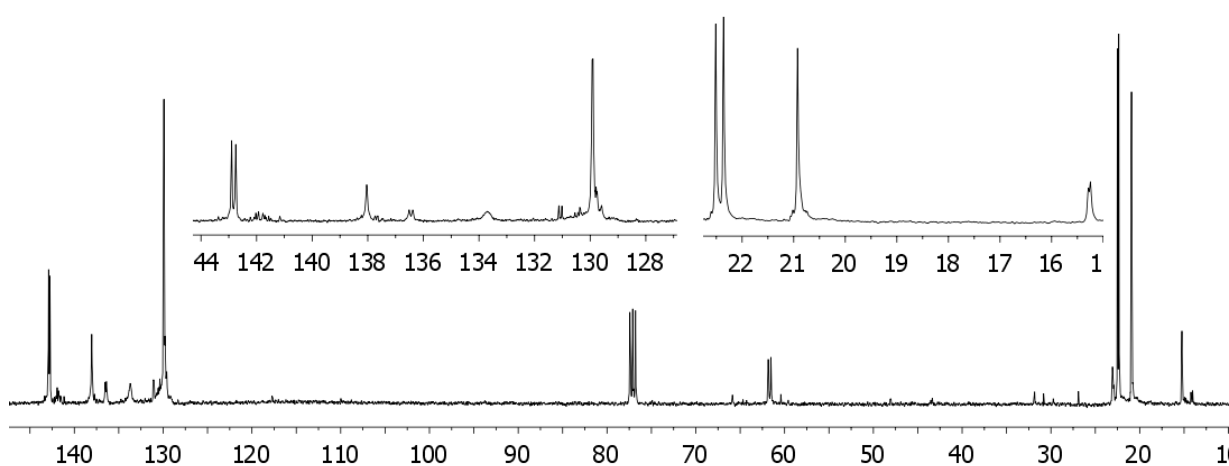

$^{13}\text{C}\{^1\text{H}\}$  NMR (101 MHz, 299 K,  $\text{CDCl}_3$ ) spectrum of compound **III**.

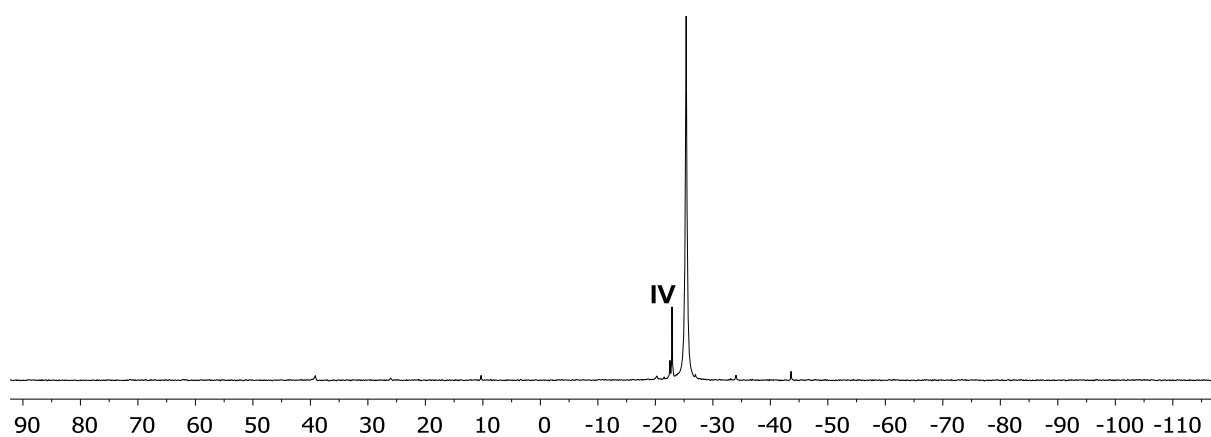

$^{31}\text{P}\{^1\text{H}\}$  NMR (162 MHz, 299 K,  $\text{CDCl}_3$ ) spectrum of compound **III**. [admixed with compound **IV**].

**2-(Dimesitylphosphino)but-3-en-1-ol (IV).** From 1<sup>st</sup> Experiment: Colorless oil (0.33 g, 9%).

The solution of the oil in CDCl<sub>3</sub> was admixed with 2-(dimesitylphosphino)but-2-en-1-ol (III) (ca.: 20% (<sup>1</sup>H)).

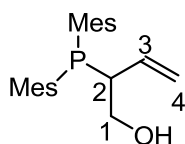

<sup>1</sup>H NMR (300 MHz, 299 K, CDCl<sub>3</sub>) data are consistent to those listed below.

<sup>31</sup>P{<sup>1</sup>H} NMR (121 MHz, 299 K, CDCl<sub>3</sub>):  $\delta = -23.0$  ( $\nu_{1/2} \sim 2$  Hz).

<sup>31</sup>P NMR (121 MHz, 299 K, CDCl<sub>3</sub>):  $\delta = -23.0$  ( $\nu_{1/2} \sim 20$  Hz).

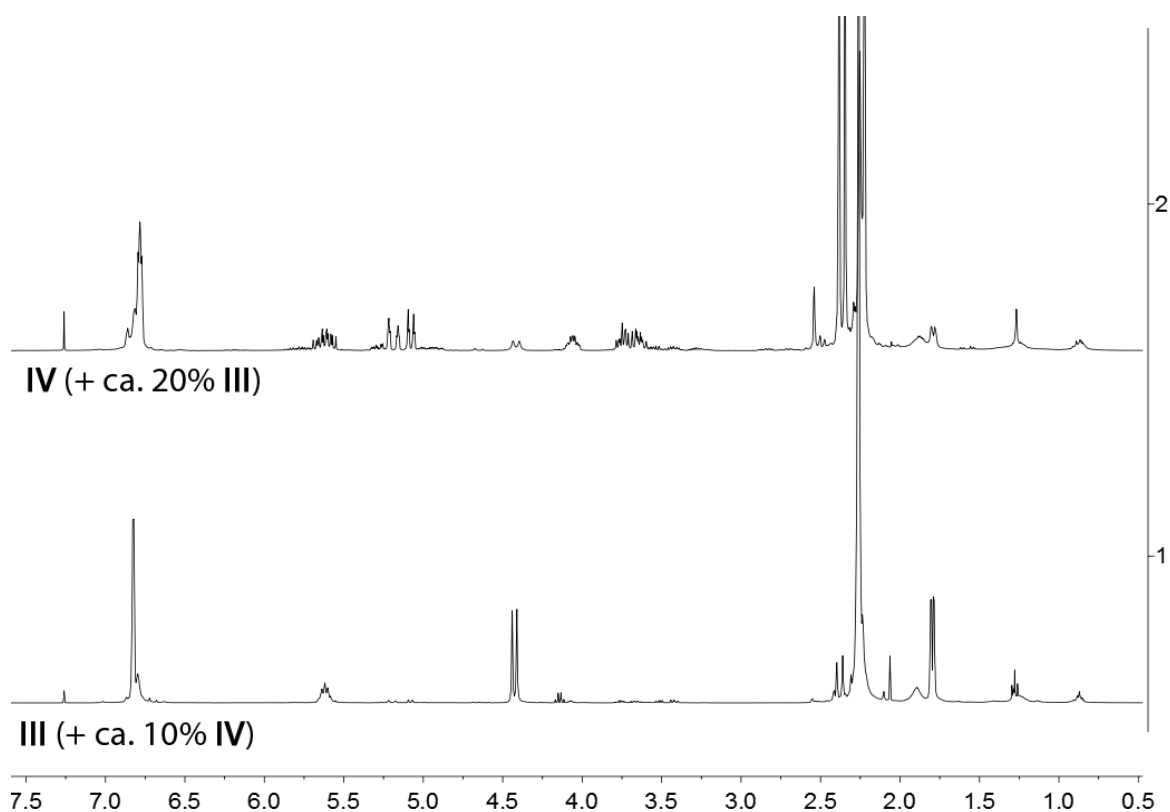

(1) <sup>1</sup>H NMR (400 MHz, 299 K, CDCl<sub>3</sub>) and (2) <sup>1</sup>H NMR (300 MHz, 299 K, CDCl<sub>3</sub>)

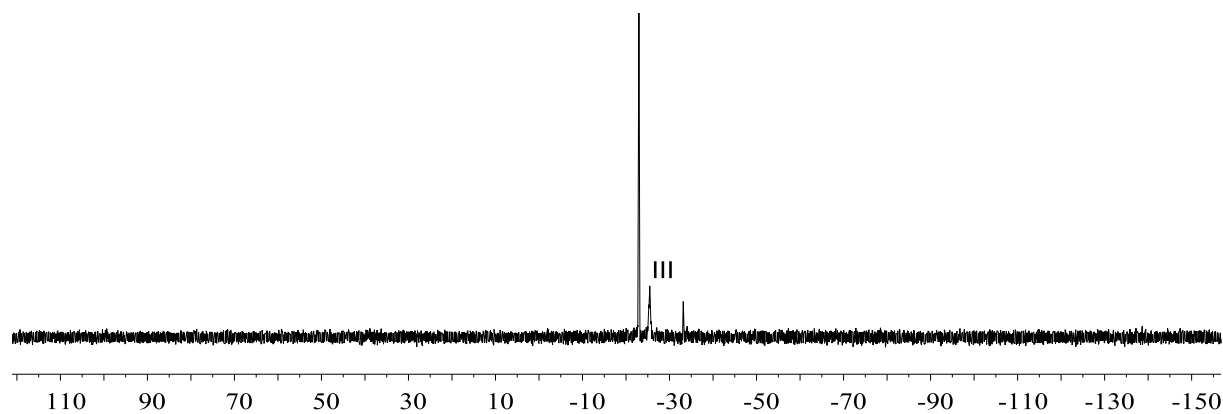

<sup>31</sup>P NMR (121 MHz, 299 K, CDCl<sub>3</sub>) spectrum of compound IV.

From 3<sup>rd</sup> Experiment: Colorless oil (0.50 g, 23%). The solution of the oil in CDCl<sub>3</sub> was admixed with 2-(dimesitylphosphino)but-2-en-1-ol (**III**) (ca.: 8% (<sup>1</sup>H)).

<sup>1</sup>H NMR (400 MHz, 299 K, CDCl<sub>3</sub>): δ = 6.79 (d, <sup>4</sup>J<sub>HH</sub> = 2.6 Hz, 2H, *m*-Mes<sup>a</sup>), 6.77 (d, <sup>4</sup>J<sub>HH</sub> = 2.6 Hz, 2H, *m*-Mes<sup>b</sup>), 5.62 (m, 1H, 3-H), 5.19 (dm, <sup>3</sup>J<sub>HH</sub> = 17.3 Hz, 1H, 4-H<sup>Z</sup>), 5.07 (dm, <sup>3</sup>J<sub>HH</sub> = 10.3 Hz, 1H, 4-H<sup>E</sup>), 4.06 (m, 1H, 2-H), 3.74, 3.65 (each m, each 1H, 1-H), 2.38 (s, 6H, *o*-CH<sub>3</sub><sup>Mes,a</sup>), 2.34 (s, 6H, *o*-CH<sub>3</sub><sup>Mes,b</sup>), 2.224 (s, 3H, *p*-CH<sub>3</sub><sup>Mes,a</sup>), 2.219 (s, 3H, *p*-CH<sub>3</sub><sup>Mes,b</sup>), 1.96 (br, 1H, OH)<sup>t</sup>, [<sup>t</sup> tentative assignment].

<sup>13</sup>C{<sup>1</sup>H} NMR (101 MHz, 299 K, CDCl<sub>3</sub>): δ 143.2 (d, <sup>2</sup>J<sub>PC</sub> = 14.8 Hz, *o*-Mes<sup>b</sup>), 142.1 (d, <sup>2</sup>J<sub>PC</sub> = 14.6 Hz, *o*-Mes<sup>a</sup>), 138.2 (*p*-Mes<sup>b</sup>), 137.7 (*p*-Mes<sup>a</sup>), 137.1 (d, <sup>2</sup>J<sub>PC</sub> = 11.6 Hz, C3), 130.8 (d, <sup>1</sup>J<sub>PC</sub> = 25.5 Hz, *i*-Mes<sup>a</sup>), 130.3 (br d, <sup>3</sup>J<sub>PC</sub> = 2.6 Hz, *m*-Mes<sup>a</sup>), 129.9 (d, <sup>1</sup>J<sub>PC</sub> = 22.0 Hz, *i*-Mes<sup>b</sup>), 129.7 (d, <sup>3</sup>J<sub>PC</sub> = 3.7 Hz, *m*-Mes<sup>b</sup>), 117.7 (d, <sup>3</sup>J<sub>PC</sub> = 10.4 Hz, C4), 64.4 (d, <sup>2</sup>J<sub>PC</sub> = 40.1 Hz, C1), 43.4 (d, <sup>1</sup>J<sub>PC</sub> = 17.3 Hz, C2), 23.0 (d, <sup>3</sup>J<sub>PC</sub> = 15.0 Hz), 23.0 (d, <sup>3</sup>J<sub>PC</sub> = 13.5 Hz)(*o*-CH<sub>3</sub><sup>Mes,ab</sup>), 20.8 (*p*-CH<sub>3</sub><sup>Mes,b</sup>), 20.7 (*p*-CH<sub>3</sub><sup>Mes,a</sup>).

<sup>1</sup>H,<sup>1</sup>H GCOSY (400 MHz/ 400 MHz, 299 K, CDCl<sub>3</sub>) [selected traces]: δ<sup>1</sup>H/ δ<sup>1</sup>H = 6.79/ 2.38, 2.224 (*m*-Mes<sup>a</sup>/ *o*-CH<sub>3</sub><sup>Mes,a</sup>, *p*-CH<sub>3</sub><sup>Mes,b</sup>), 5.62/ 5.19, 5.07, 4.06 (3-H/ 4-H<sup>E</sup>, 4-H<sup>Z</sup>, 2-H).

<sup>1</sup>H,<sup>13</sup>C GHSQC (400 MHz/ 101 MHz, 299 K, CDCl<sub>3</sub>): δ<sup>1</sup>H/ δ<sup>13</sup>C = 6.79/ 130.3 (*m*-Mes<sup>a</sup>), 6.77/ 129.7 (*m*-Mes<sup>b</sup>), 5.62/ 137.1 (C3), 5.19, 5.07/ 117.7 (C4), 4.06/ 43.4 (C2), 3.74, 3.65/64.4 (C1), 2.38/ 23.0 (*o*-CH<sub>3</sub><sup>Mes,a</sup>), 2.34/ 23.0 (*o*-CH<sub>3</sub><sup>Mes,b</sup>), 2.224/ 20.7 (*p*-CH<sub>3</sub><sup>Mes,a</sup>), 2.219/ 20.8 (*p*-CH<sub>3</sub><sup>Mes,b</sup>).

<sup>1</sup>H,<sup>13</sup>C GHMBC (400 MHz/ 101 MHz, 299 K, CDCl<sub>3</sub>) [selected traces]: δ<sup>1</sup>H/ δ<sup>13</sup>C = 6.79/ 130.8, 130.3, 23.0, 20.7 (*m*-Mes<sup>a</sup>/ *i*-Mes<sup>a</sup>, *m*-Mes<sup>a</sup>, *o*-CH<sub>3</sub><sup>Mes,a</sup>, *p*-CH<sub>3</sub><sup>Mes,a</sup>), 6.77/ 129.9, 129.7, 23.0, 20.8 (*m*-Mes<sup>b</sup>/ *i*-Mes<sup>b</sup>, *m*-Mes<sup>b</sup>, *o*-CH<sub>3</sub><sup>Mes,b</sup>, *p*-CH<sub>3</sub><sup>Mes,b</sup>), 2.224/ 137.7, 130.3 (*p*-CH<sub>3</sub><sup>Mes,a</sup>/ *p*-Mes<sup>a</sup>, *m*-Mes<sup>a</sup>), 2.219/ 138.2, 129.7 (*p*-CH<sub>3</sub><sup>Mes,b</sup>/ *p*-Mes<sup>b</sup>, *m*-Mes<sup>b</sup>).

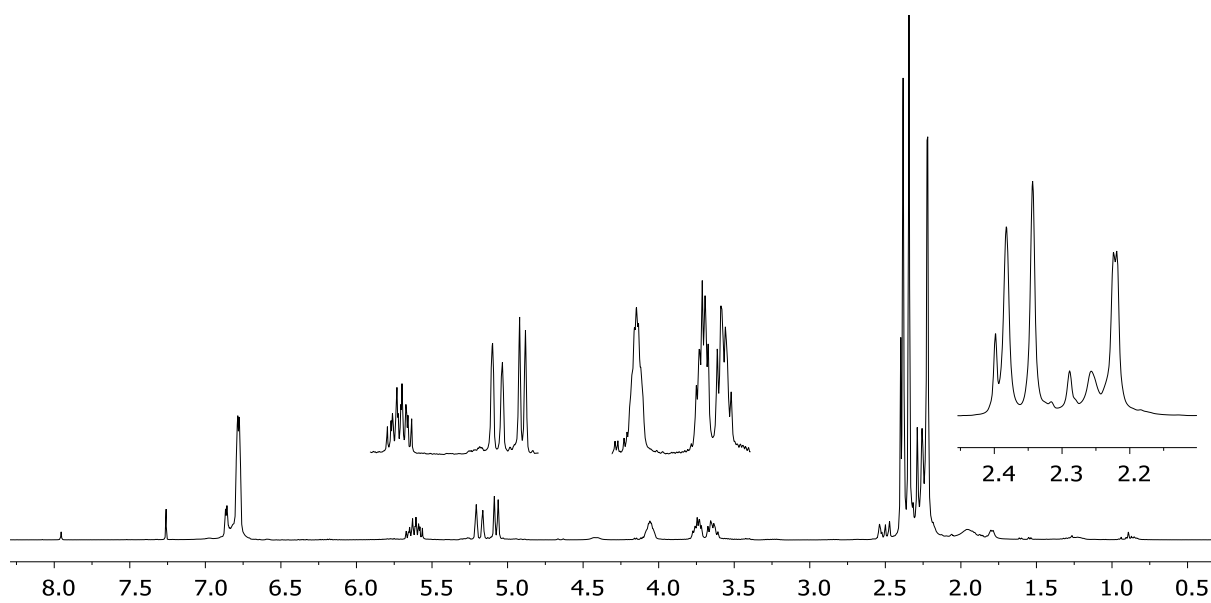

**$^1\text{H}$  NMR** (400 MHz, 299 K,  $\text{CDCl}_3$ ) spectrum of compound **IV**.

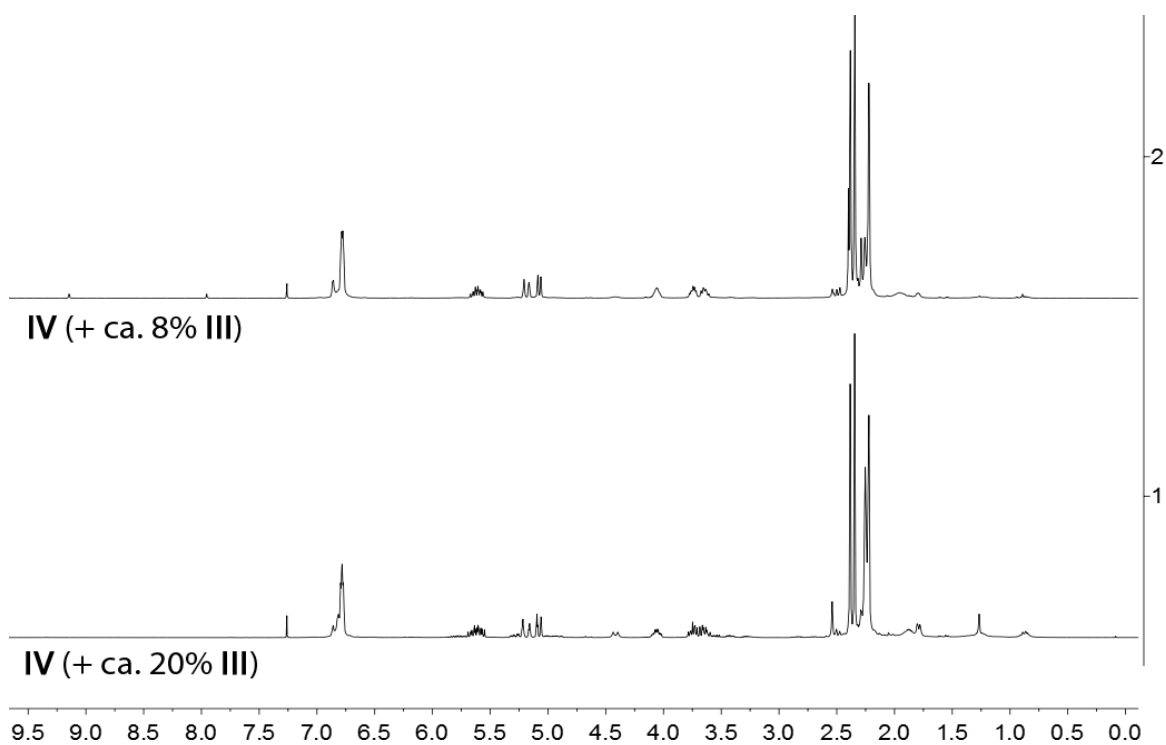

(1)  **$^1\text{H}$  NMR** (300 MHz, 299 K,  $\text{CDCl}_3$ ) and (2)  **$^1\text{H}$  NMR** (400 MHz, 299 K,  $\text{CDCl}_3$ )

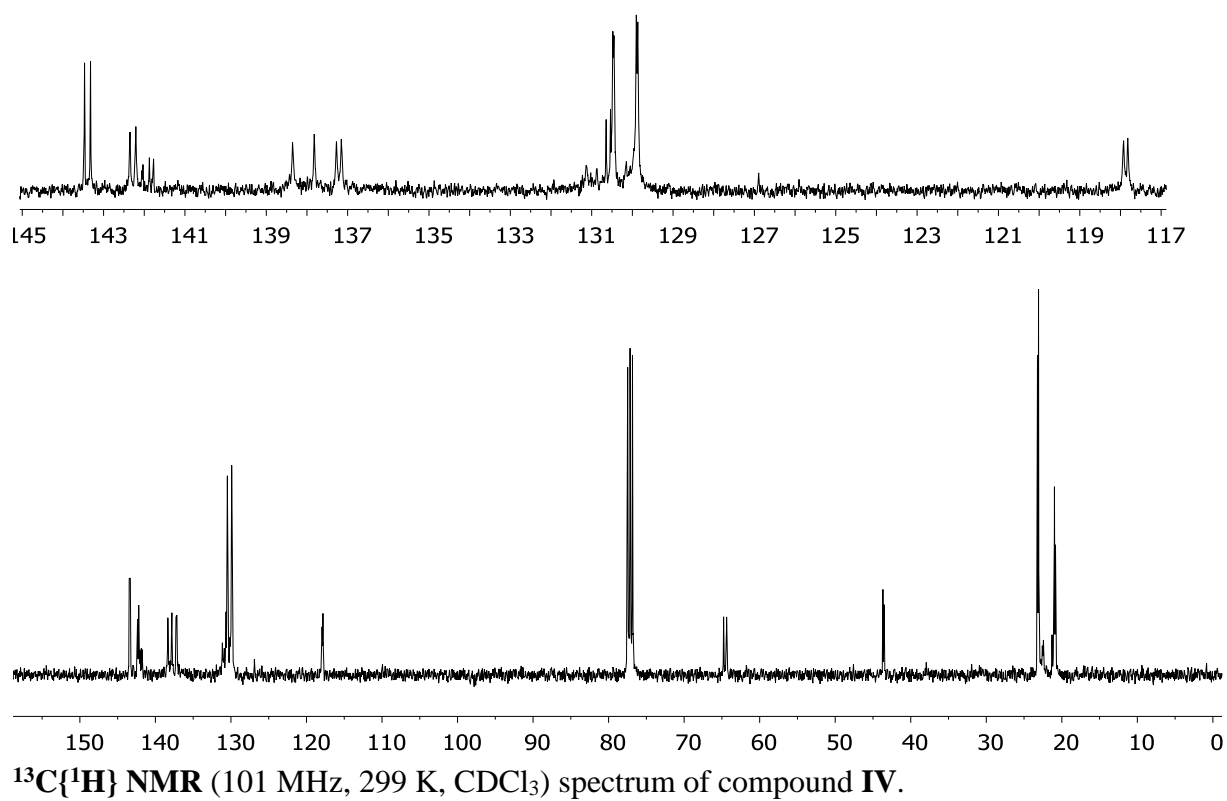

**(E)-4-(Dimesitylphosphino)but-3-en-1-ol (V).**

From 1<sup>st</sup> Experiment: light yellow oil (1.20 g, 34%). A solution of the oil in C<sub>6</sub>D<sub>6</sub> was analyzed by NMR experiments (admixed with ethyl acetate).

**<sup>1</sup>H NMR** (300 MHz, 299 K, C<sub>6</sub>D<sub>6</sub>):  $\delta$  = 6.70 (dm,  $^4J_{\text{HH}}$  = 2.6 Hz, 4H, *m*-Mes), 6.69 (ddt,  $^2J_{\text{PH}}$  = 17.2 Hz,  $^3J_{\text{HH}}$  = 16.3 Hz,  $^4J_{\text{HH}}$  = 1.3 Hz, 1H, 4-H), 5.90 (ddt,  $^3J_{\text{HH}}$  = 16.3 Hz,  $^3J_{\text{PH}}$  = 13.3 Hz,  $^3J_{\text{HH}}$  = 6.8 Hz, 1H, 3-H), 3.26 (t,  $^3J_{\text{HH}}$  = 6.5 Hz, 2H, 1-H), 2.38 (s, 12H, *o*-CH<sub>3</sub><sup>Mes</sup>), 2.07 (s, 6H, *p*-CH<sub>3</sub><sup>Mes</sup>), 2.05 (m, 2H, 2-H), 0.86 (br, OH)<sup>t</sup>, [<sup>t</sup> tentative assignment].

**<sup>31</sup>P{<sup>1</sup>H} NMR** (121 MHz, 299K, C<sub>6</sub>D<sub>6</sub>):  $\delta$  = -25.0 ( $\nu_{1/2}$  ~ 2 Hz).

**<sup>31</sup>P NMR** (121 MHz, 299K, C<sub>6</sub>D<sub>6</sub>):  $\delta$  = -25.0 (tm,  $J_{\text{PH}}$  ~ 15.0 Hz).

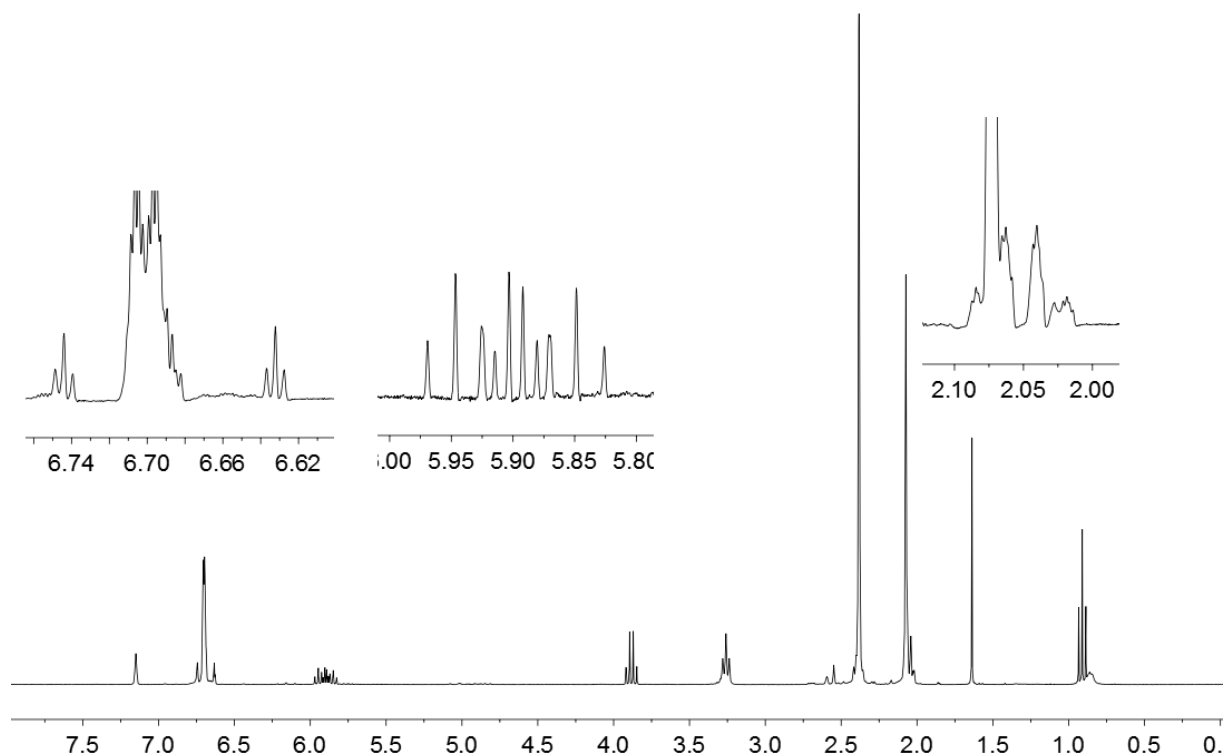

**<sup>1</sup>H NMR** (300 MHz, 299 K, C<sub>6</sub>D<sub>6</sub>) spectrum of compound V.

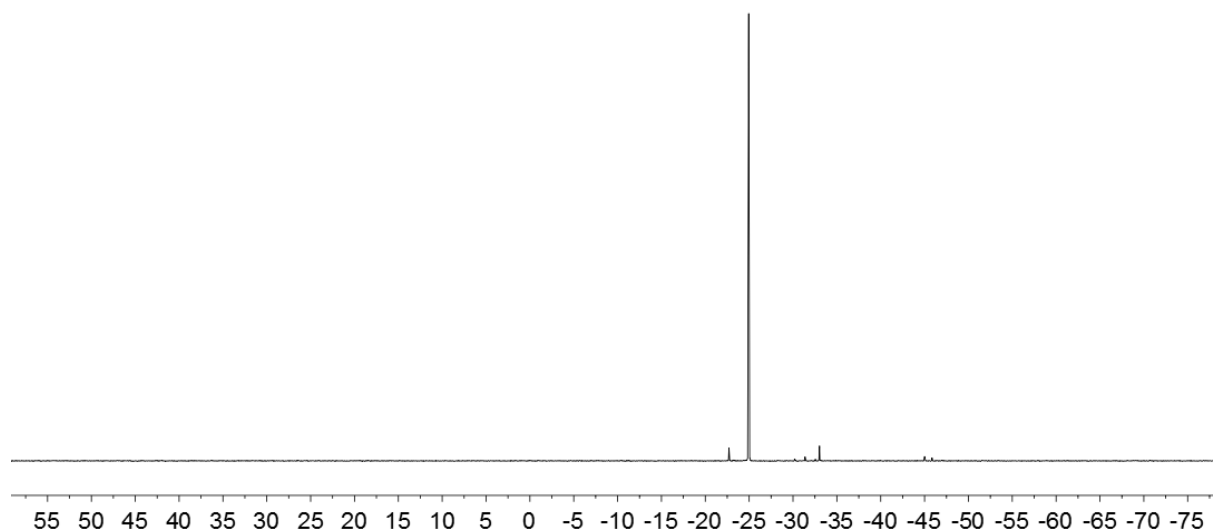

**$^{31}\text{P}\{^1\text{H}\}$  NMR** (121 MHz, 299K,  $\text{C}_6\text{D}_6$ ) spectrum of compound **V**.

*From 2<sup>nd</sup> Experiment:* White crystalline solid (0.2 g, 18%). A solution of the crystals in  $\text{CDCl}_3$  was analyzed by NMR experiments (admixed with traces of ethyl acetate).

**$^1\text{H}$  NMR** (400 MHz, 299 K,  $\text{CDCl}_3$ ):  $\delta$  = 6.80 (dm,  $^4J_{\text{HH}} = 2.4$  Hz, 4H, *m*-Mes), 6.72 (ddm,  $^2J_{\text{PH}} = 16.4$  Hz<sup>t</sup>,  $^3J_{\text{HH}} = 15.6$  Hz<sup>t</sup>, 1H, 4-H), 5.88 (m, 1H, 3-H), 3.66 (t,  $^3J_{\text{HH}} = 6.5$  Hz, 2H, 1-H), 2.41 (q<sub>m</sub>,  $^3J_{\text{HH}} = 6.5$  Hz, 2H, 2-H), 2.27 (s, 12H, *o*-CH<sub>3</sub><sup>Mes</sup>), 2.25 (s, 6H, *p*-CH<sub>3</sub><sup>Mes</sup>), 1.78 (br, 1H, OH)<sup>t</sup>, [<sup>t</sup> tentative assignment].

**$^{13}\text{C}\{^1\text{H}\}$  NMR** (101 MHz, 299K,  $\text{CDCl}_3$ ):  $\delta$  = 141.7 (d,  $^2J_{\text{PC}} = 14.2$  Hz, *o*-Mes), 137.7 (*p*-Mes), 137.0 (br d,  $^2J_{\text{PC}} = 29.8$  Hz, C3), 131.7 (br d,  $^1J_{\text{PC}} \sim 18$  Hz, *i*-Mes), 130.5 (br, C4), 129.7 (d,  $^3J_{\text{PC}} = 3.3$  Hz, *m*-Mes), 61.5 (C1), 38.2 (d,  $^3J_{\text{PC}} = 11.2$  Hz, C2), 23.0 (d,  $^3J_{\text{PC}} = 13.8$  Hz, *o*-CH<sub>3</sub><sup>Mes</sup>), 20.8 (*p*-CH<sub>3</sub><sup>Mes</sup>).

**$^1\text{H}, ^1\text{H}$  GCOSY** (400 MHz/ 400 MHz, 299 K,  $\text{CDCl}_3$ ) [selected trace]:  $\delta^1\text{H}/\delta^1\text{H} = 5.88/ 6.72$ , 2.41 (3-H/ 4-H, 2-H).

**$^1\text{H}, ^{13}\text{C}$  GHSQC** (400 MHz/ 101 MHz, 299 K,  $\text{CDCl}_3$ ):  $\delta^1\text{H}/\delta^{13}\text{C} = 6.80/ 129.7$  (*m*-Mes), 6.72/ 130.5 (C4), 5.88/ 137.0 (C3), 3.66/ 61.5 (C1), 2.41/ 38.2 (C2), 2.27/ 23.0 (*o*-CH<sub>3</sub><sup>Mes</sup>), 2.25/ 20.8 (*p*-CH<sub>3</sub><sup>Mes</sup>).

**$^1\text{H}, ^{13}\text{C}$  GHMBC** (400 MHz/ 101 MHz, 299 K,  $\text{CDCl}_3$ ) [selected traces]:  $\delta^1\text{H}/ \delta^{13}\text{C} = 6.80/$   
 131.7, 129.7, 23.0, 20.8 (*m*-Mes/ *i*-Mes, *m*-Mes, *o*-CH<sub>3</sub><sup>Mes</sup>, *p*-CH<sub>3</sub><sup>Mes</sup>), 2.27/ 141.7, 131.7,  
 129.7 (*o*-CH<sub>3</sub><sup>Mes</sup>/ *o*-Mes, *i*-Mes, *m*-Mes), 2.25/ 137.7, 129.7 (*p*-CH<sub>3</sub><sup>Mes</sup>/ *p*-Mes, *m*-Mes).

**$^{31}\text{P}\{^1\text{H}\}$  NMR** (121 MHz, 299 K,  $\text{CDCl}_3$ ):  $\delta = -25.3$  ( $\nu_{1/2} \sim 15$  Hz).

**$^{31}\text{P}$  NMR** (121 MHz, 299 K,  $\text{CDCl}_3$ ):  $\delta = -25.3$  ( $\nu_{1/2} \sim 40$  Hz).

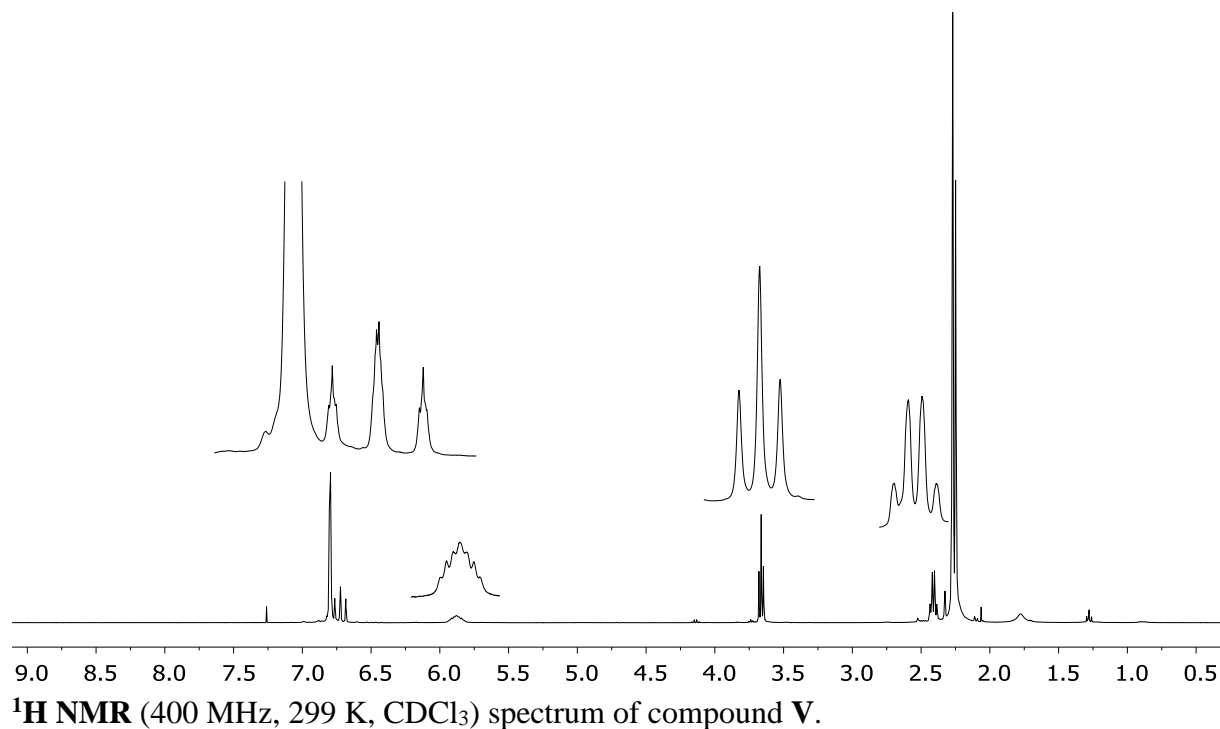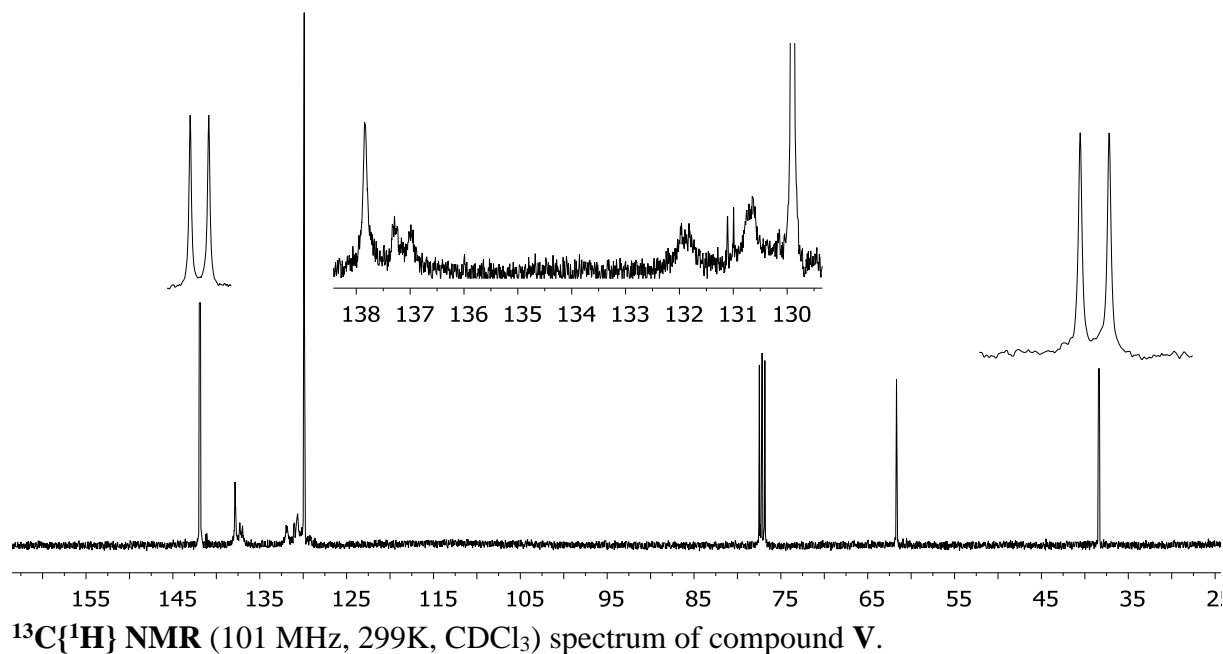

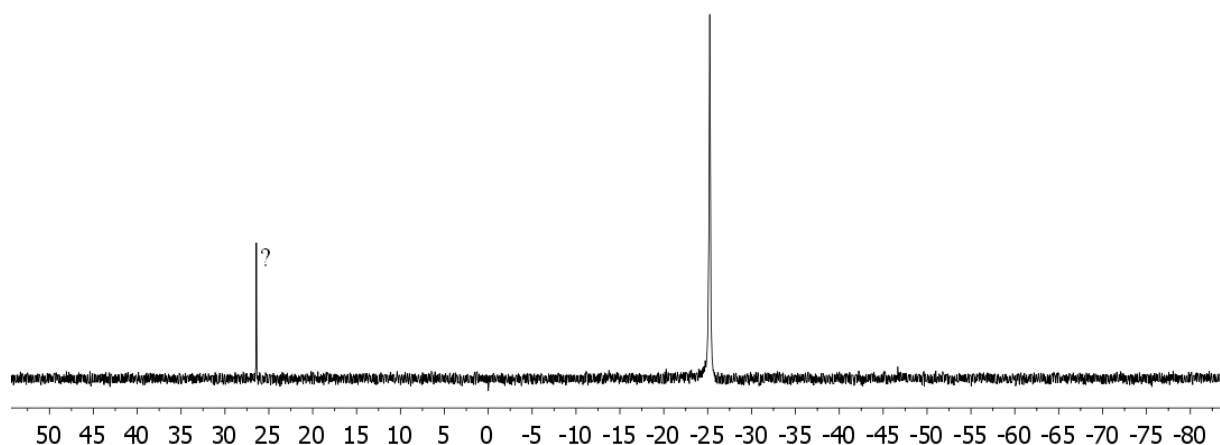

$^{31}\text{P}\{^1\text{H}\}$  NMR (121 MHz, 299 K,  $\text{CDCl}_3$ ) spectra of compound **V**. [? not identified yet].

*From 3<sup>rd</sup> Experiment:* white crystalline solid

**HRMS** (MicroTof):  $[\text{M}+\text{H}]^+$  ( $\text{C}_{22}\text{H}_{29}\text{OPH}^+$ ): Calcd.: 314.2034, Found: 314.2027.

**Melting point** (DSC): 61 °C.

**X-Ray crystal structure analysis of (*E*)-4-(dimesitylphosphino)but-3-en-1-ol (**V**):** formula  $\text{C}_{22}\text{H}_{29}\text{OP}$ ,  $M = 340.42$ , colourless crystal, 0.11 x 0.05 x 0.03 mm,  $a = 15.6981(4)$ ,  $b = 7.4997(2)$ ,  $c = 16.6619(4)$  Å,  $\beta = 93.155(1)^\circ$ ,  $V = 1958.6(1)$  Å<sup>3</sup>,  $\rho_{\text{calc}} = 1.154$  gcm<sup>-3</sup>,  $\mu = 0.146$  mm<sup>-1</sup>, empirical absorption correction ( $0.984 \leq T \leq 0.995$ ),  $Z = 4$ , monoclinic, space group  $P2_1/c$  (No. 14),  $\lambda = 0.71073$  Å,  $T = 223(2)$  K,  $\omega$  and  $\varphi$  scans, 16993 reflections collected ( $\pm h$ ,  $\pm k$ ,  $\pm l$ ), 3359 independent ( $R_{\text{int}} = 0.071$ ) and 2313 observed reflections [ $I > 2\sigma(I)$ ], 271 refined parameters,  $R = 0.072$ ,  $wR^2 = 0.166$ , max. (min.) residual electron density 0.25 (-0.21) e.Å<sup>-3</sup>, hydrogen atoms were calculated and refined as riding atoms.

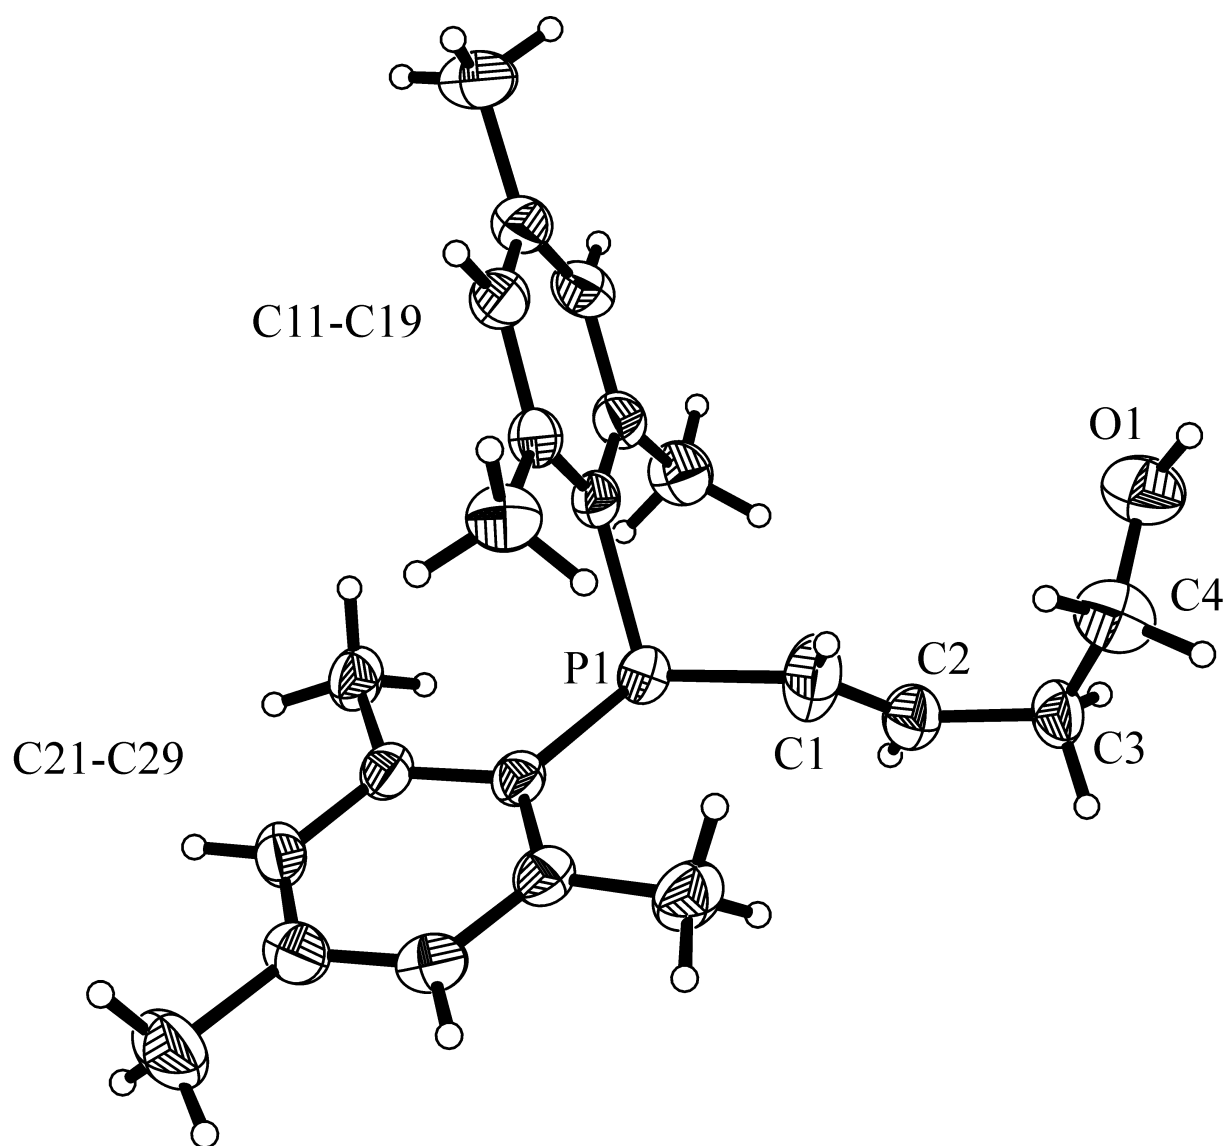

### Synthesis of dimesityl(1-(trimethylsilyloxy)but-3-en-2-yl)phosphane (**5**).

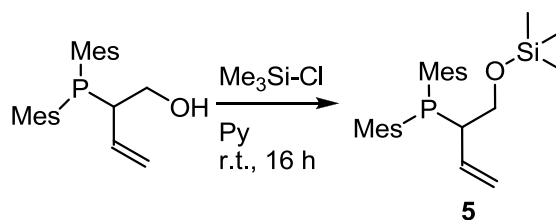

**1<sup>st</sup> Experiment:** Trimethylsilyl chloride (0.93 mL, 0.73 mmol) and an excess of pyridine (0.24 mL) were added to a solution of 2-(dimesitylphosphino)but-3-en-1-ol (**IV**) (0.5 g, 1.47 mmol) in *n*-pentane (3 mL). Immediately, in a vigorous reaction, a white precipitate was formed. After 16 h stirring at ambient temperature, all volatiles were removed in *vacuo* and the residue was extracted with *n*-pentane (5x5 mL). Drying in *vacuo* gave a colorless oil, which was purified by column chromatography (CH<sub>2</sub>Cl<sub>2</sub>/ *n*-pentane 1:1, 1% NEt<sub>3</sub>) (0.27 g, 44%).

[*Comment:* Compound **5** lost the trimethylsilyl group during chromatography resulting in the starting material **IV**].

**HRMS** (MicroTof): M+H<sup>+</sup> (C<sub>25</sub>H<sub>37</sub>OPSiH<sup>+</sup>): Calcd.: 413.2430, Found: 413.2428.

**Elemental analysis:** Calcd. for C<sub>25</sub>H<sub>37</sub>OPSi: C, 72.77; H, 9.04. Found: C, 73.10; H, 8.80.

**<sup>1</sup>H NMR** (400 MHz, 299 K, CDCl<sub>3</sub>): δ = 6.77, 6.75 (each d, <sup>4</sup>J<sub>PH</sub> = 2.7 Hz, each 2H, *m*-Mes), 5.53 (m, 1H, 3-H), 5.05 (dm, <sup>3</sup>J<sub>HH,trans</sub> = 16.7 Hz), 4.91 (dm, <sup>3</sup>J<sub>HH,cis</sub> = 10.4 Hz)(each 1H, 4-H), 4.14 (m, 1H, 2-H), 3.83, 3.75 (each m, each 1H, 1-H), 2.38, 2.35 (each s, each 6H, *o*-CH<sub>3</sub><sup>Mes</sup>), 2.22, 2.21 (each s, each 3H, *p*-CH<sub>3</sub><sup>Mes</sup>), 0.07 (s, <sup>2</sup>J<sub>SiH</sub> = 6.6 Hz, 9H, SiMe<sub>3</sub>).

**2<sup>nd</sup> Experiment:** Trimethylsilyl chloride (1.57 mL, 1.23 mmol) and an excess of pyridine (0.4 mL) were added to a solution of 2-(dimesitylphosphino)but-3-en-1-ol (**V**) (0.84 g, 2.47 mmol) in *n*-pentane (5 mL). Immediately, in a vigorous reaction, a white precipitate was formed.

After 16 h stirring at ambient temperature, all volatiles were removed *in vacuo* and the residue was extracted with *n*-pentane (5x5 mL). Drying in *vacuo* gave compound **5** as a colorless oil (0.9 g, 89%).

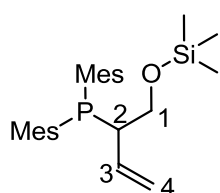

**<sup>1</sup>H NMR** (600 MHz, 299 K, CD<sub>2</sub>Cl<sub>2</sub>): δ = 6.784, 6.778 (each d, <sup>4</sup>*J*<sub>HH</sub> = 3.2 Hz, each 2H, *m*-Mes), 5.54 (dddd, <sup>3</sup>*J*<sub>HH,trans</sub> = 17.1 Hz, <sup>3</sup>*J*<sub>HH,cis</sub> = 10.3 Hz, <sup>3</sup>*J*<sub>HH</sub> = 8.8 Hz, <sup>3</sup>*J*<sub>PH</sub> = 5.5 Hz, 1H, 3-H), 5.03 (dm, <sup>3</sup>*J*<sub>HH,trans</sub> = 17.1 Hz, 1H, 4-H), 4.87 (dm, <sup>3</sup>*J*<sub>HH,cis</sub> = 10.3 Hz, 1H, 4-H), 4.14 (dddd, <sup>3</sup>*J*<sub>HH</sub> ~ <sup>3</sup>*J*<sub>HH</sub> = 8.8 Hz, <sup>3</sup>*J*<sub>HH</sub> = 3.9 Hz, <sup>2</sup>*J*<sub>PH</sub> = 3.6 Hz, 1H, 2-H), 3.82 (ddd, <sup>2</sup>*J*<sub>HH</sub> = 10.4 Hz, <sup>3</sup>*J*<sub>PH</sub> = 7.0 Hz, <sup>3</sup>*J*<sub>HH</sub> = 3.9 Hz, 1H, 1-H), 3.76 (ddd, <sup>2</sup>*J*<sub>HH</sub> = 10.4 Hz, <sup>3</sup>*J*<sub>HH</sub> = 8.8 Hz, <sup>3</sup>*J*<sub>PH</sub> = 4.9 Hz, 1H, 1-H), 2.37, 2.35 (each s, each 6H, *o*-CH<sub>3</sub><sup>Mes</sup>), 2.22, 2.21 (each s, each 3H, *p*-CH<sub>3</sub><sup>Mes</sup>), 0.07 (s, <sup>2</sup>*J*<sub>SiH</sub> = 6.4 Hz, 9H, SiMe<sub>3</sub>).

**<sup>1</sup>H{<sup>31</sup>P}NMR** (600 MHz, 299 K, CD<sub>2</sub>Cl<sub>2</sub>): δ = 6.79, 6.78 (each s, each 2H, *m*-Mes), 5.54 (ddd, <sup>3</sup>*J*<sub>HH,trans</sub> = 17.2 Hz, <sup>3</sup>*J*<sub>HH,cis</sub> = 10.4 Hz, <sup>3</sup>*J*<sub>HH</sub> = 8.3 Hz, 1H, 3-H), 5.03 (d, <sup>3</sup>*J*<sub>HH,trans</sub> = 17.1 Hz, 1H, 4-H), 4.87 (d, <sup>3</sup>*J*<sub>HH,cis</sub> = 10.4 Hz, 1H, 4-H), 4.14 (td, <sup>3</sup>*J*<sub>HH</sub> = 8.8 Hz, <sup>3</sup>*J*<sub>HH</sub> = 3.9 Hz, 1H, 2-H), 3.82 (dd, <sup>2</sup>*J*<sub>HH</sub> = 10.4 Hz, <sup>3</sup>*J*<sub>HH</sub> = 3.9 Hz, 1H, 1-H), 3.76 (dd, <sup>2</sup>*J*<sub>HH</sub> = 10.4 Hz, <sup>3</sup>*J*<sub>HH</sub> = 8.8 Hz, 1H, 1-H), 2.37, 2.35 (each s, each 6H, *o*-CH<sub>3</sub><sup>Mes</sup>), 2.22, 2.21 (each s, each 3H, *p*-CH<sub>3</sub><sup>Mes</sup>), 0.07 (s, 9H, SiMe<sub>3</sub>).

**<sup>13</sup>C{<sup>1</sup>H} NMR** (151 MHz, 299 K, CD<sub>2</sub>Cl<sub>2</sub>): δ = 144.0 (d, <sup>2</sup>*J*<sub>PC</sub> = 15.0 Hz), 142.4 (d, <sup>2</sup>*J*<sub>PC</sub> = 14.5 Hz)(*o*-Mes), 138.7 (d, <sup>4</sup>*J*<sub>PC</sub> = 0.7 Hz), 137.7 (*p*-Mes), 137.7 (d, <sup>2</sup>*J*<sub>PC</sub> = 10.3 Hz, C3), 132.0 (d, <sup>1</sup>*J*<sub>PC</sub> = 29.5 Hz), 130.9 (d, <sup>1</sup>*J*<sub>PC</sub> = 19.0 Hz)(*i*-Mes), 130.6 (d, <sup>3</sup>*J*<sub>PC</sub> = 2.7 Hz), 129.8 (d, <sup>3</sup>*J*<sub>PC</sub> = 4.0 Hz)(*m*-Mes), 116.2 (d, <sup>3</sup>*J*<sub>PC</sub> = 10.9 Hz, C4), 65.7 (d, <sup>2</sup>*J*<sub>PC</sub> = 48.9 Hz, C1), 42.7 (d, <sup>1</sup>*J*<sub>PC</sub> = 16.1 Hz, C2), 23.2 (d, <sup>3</sup>*J*<sub>PC</sub> = 13.9 Hz), 23.1 (d, <sup>3</sup>*J*<sub>PC</sub> = 15.2 Hz)(*o*-CH<sub>3</sub><sup>Mes</sup>), 21.0, 20.8 (*p*-CH<sub>3</sub><sup>Mes</sup>), -0.4 (<sup>1</sup>*J*<sub>SiC</sub> = 59.0 Hz, SiMe<sub>3</sub>).

**<sup>1</sup>H,<sup>1</sup>H GCOSY** (600 MHz/ 600 MHz, 299 K, CD<sub>2</sub>Cl<sub>2</sub>) [selected trace]: δ<sup>1</sup>H/ δ<sup>1</sup>H = 4.14/ 5.54, 3.82, 3.76 (2-H/ 3-H, 1-H, 1-H).

**$^1\text{H}$ ,  $^{13}\text{C}$  GHSQC** (600 MHz/ 151 MHz, 299 K,  $\text{CD}_2\text{Cl}_2$ ):  $\delta^1\text{H}/ \delta^{13}\text{C} = 6.784/ 130.7$ ,  $6.778/ 129.9$  (*m*-Mes<sup>a,b</sup>),  $5.54/ 137.7$  (C3),  $5.03/ 116.2$  (C4),  $4.87/ 116.2$  (C4),  $4.14/ 42.7$  (C2),  $3.82/ 65.7$  (C1),  $3.76/ 65.7$  (C1),  $2.37/ 23.2$ ,  $2.35/ 23.1$  (*o*-CH<sub>3</sub><sup>Mes a,b</sup>),  $2.22/ 20.8$ ,  $2.21/ 21.0$  (*p*-CH<sub>3</sub><sup>Mes a,b</sup>),  $0.07/ -0.4$  (SiMe<sub>3</sub>).

**$^1\text{H}$ ,  $^{13}\text{C}$  GHMBC** (600 MHz/ 151 MHz, 299 K,  $\text{CD}_2\text{Cl}_2$ ) [selected traces]:  $\delta^1\text{H}/ \delta^{13}\text{C} = 6.79/ 142.4$ ,  $130.7$ ,  $23.2$ ,  $20.8$  (*m*-Mes<sup>a</sup>/ *o*-Mes<sup>a</sup>, *m*-Mes<sup>a</sup>, *o*-CH<sub>3</sub><sup>Mes a</sup>, *p*-CH<sub>3</sub><sup>Mes a</sup>),  $2.37/ 142.4$ ,  $130.7$  (*o*-CH<sub>3</sub><sup>Mes a</sup>/ *o*-Mes<sup>a</sup>, *m*-Mes<sup>a</sup>).

**$^{31}\text{P}$  { $^1\text{H}$ } NMR** (243 MHz, 299 K,  $\text{CD}_2\text{Cl}_2$ ):  $\delta = -22.3$  ( $\nu_{1/2} \sim 3$  Hz).

**$^{31}\text{P}$  { $^1\text{H}$ } NMR** (243 MHz, 299 K,  $\text{CD}_2\text{Cl}_2$ ):  $\delta = -22.3$  ( $\nu_{1/2} \sim 20$  Hz).

**$^{29}\text{Si}$ { $^1\text{H}$ } DEPT** (119 MHz, 299 K,  $\text{CD}_2\text{Cl}_2$ ):  $\delta = 17.5$  ( $\nu_{1/2} \sim 1$  Hz).

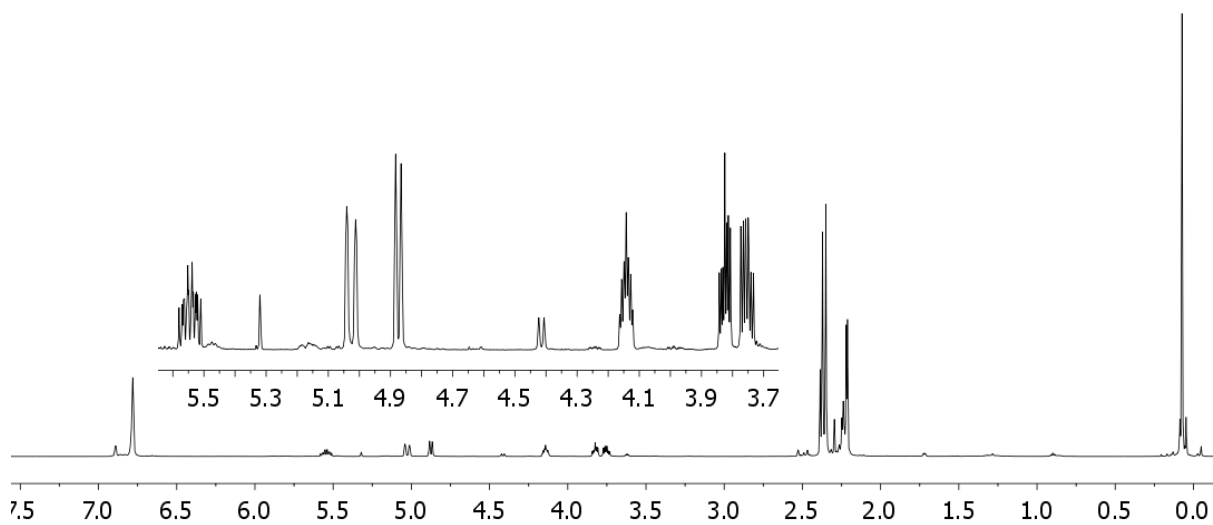

**$^1\text{H}$  NMR** (600 MHz, 299 K,  $\text{CD}_2\text{Cl}_2$ ) spectrum of compound **5**.

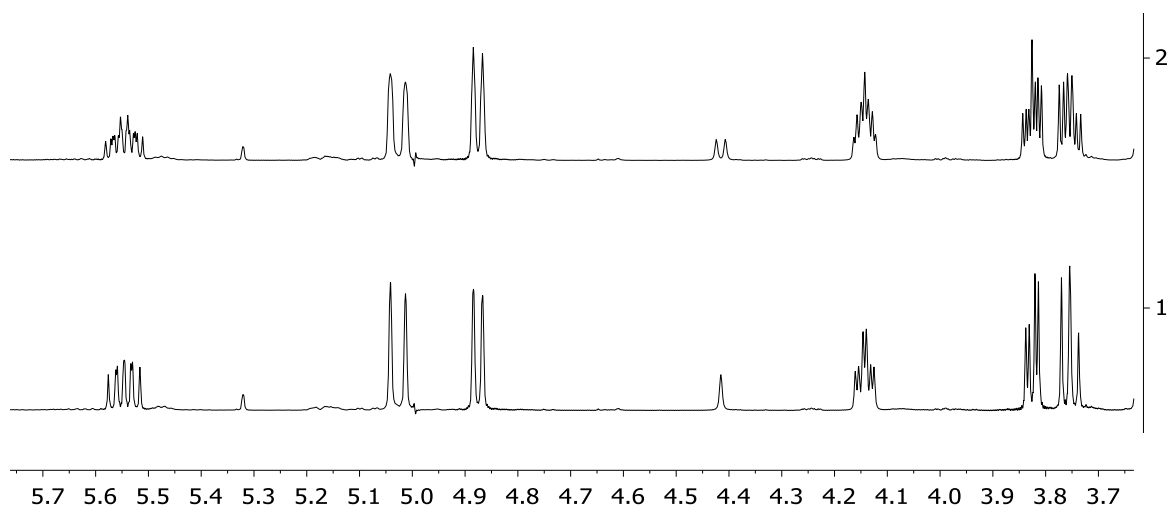

(2)  $^1\text{H}$  NMR (600 MHz, 299 K,  $\text{CD}_2\text{Cl}_2$ ) and (1)  $^1\text{H}\{^{31}\text{P}\}$  NMR (600 MHz, 299 K,  $\text{CD}_2\text{Cl}_2$ ) spectra of compound **5** (selected area).

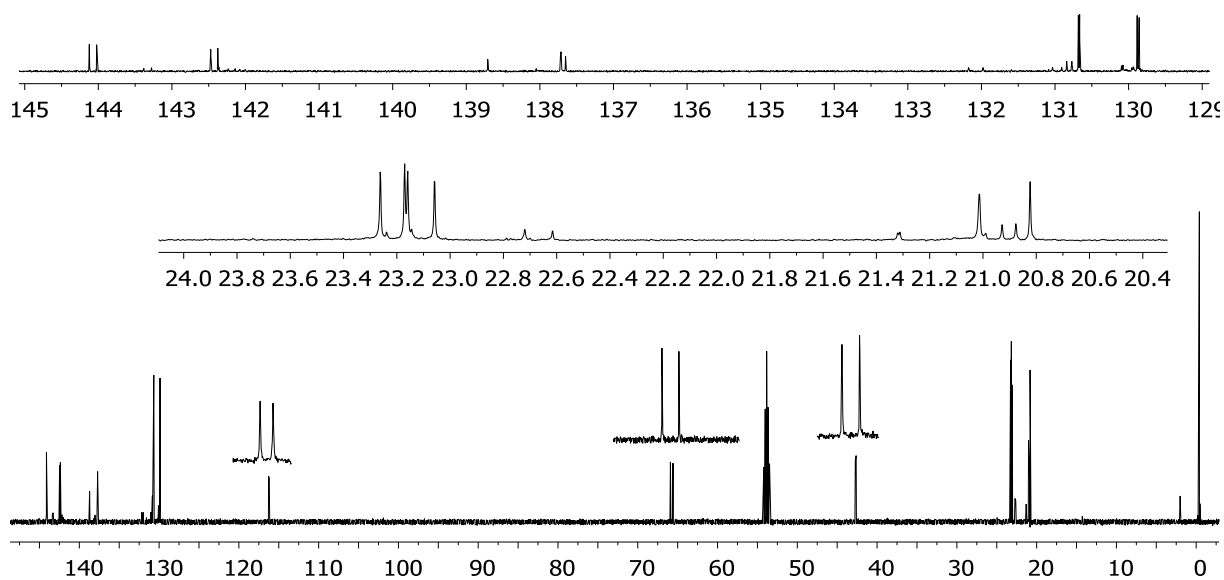

$^{13}\text{C}\{^1\text{H}\}$  NMR (151 MHz, 299 K,  $\text{CD}_2\text{Cl}_2$ ) spectrum of compound **5**.

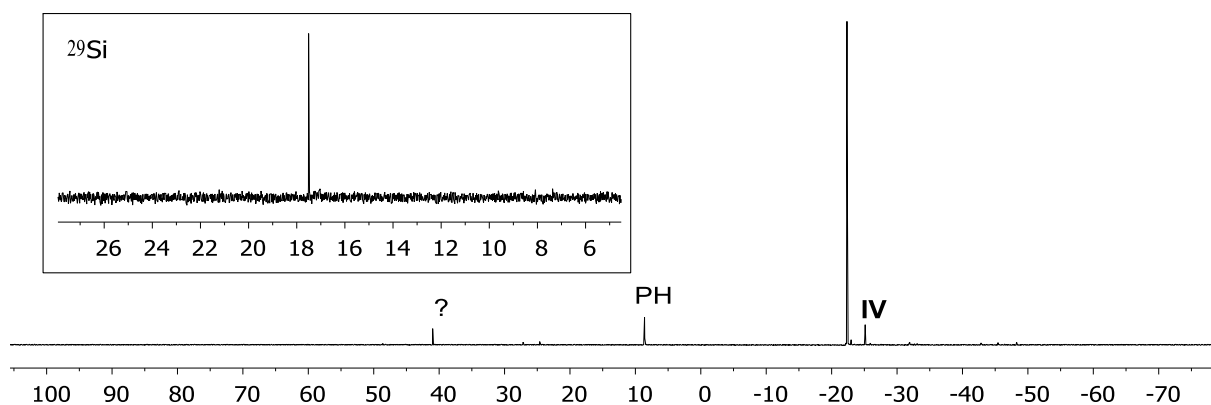

$^{29}\text{Si}\{^1\text{H}\}$  DEPT NMR (119 MHz, 299 K,  $\text{CD}_2\text{Cl}_2$ ) and  $^{31}\text{P}\{^1\text{H}\}$  NMR (243 MHz, 299 K,  $\text{CD}_2\text{Cl}_2$ ) spectra of compound **5** (78 mol%). [**?** not identified (5 mol%), **PH** ( $J_{\text{PH}} \sim 476$  Hz, 13 mol%), **IV** (4 mol%)].

## Reaction of compound **5** with HB(C<sub>6</sub>F<sub>5</sub>)<sub>2</sub>

### Generation of (cyclopropylmethyl)dimesitylphosphane **9** and siloxyborane **8**.

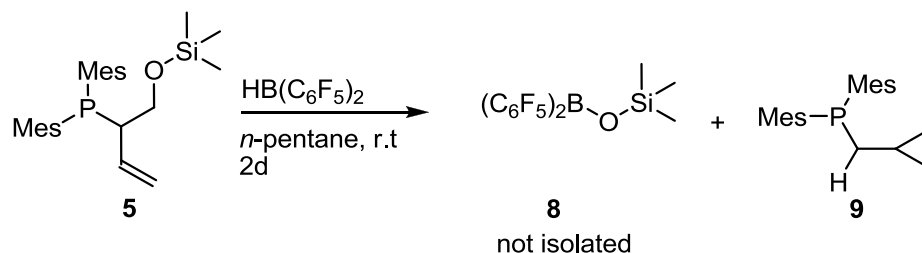

*1<sup>st</sup> Experiment: Preparation of compound **9**:* HB(C<sub>6</sub>F<sub>5</sub>)<sub>2</sub> (0.52 g, 1.50 mmol) was added at ambient temperature to a solution of dimesityl(1-(trimethylsilyloxy)but-3-en-2-yl)phosphane **5** (0.58 g, 1.41 mmol) in *n*-pentane (5 mL). After stirring for 2 days all volatiles were removed in *vacuo*. The collected colorless oil was dissolved in C<sub>6</sub>D<sub>6</sub> and analyzed by NMR experiments (before workup: see below).

Then the oil was dissolved in CH<sub>2</sub>Cl<sub>2</sub> (2 mL) and purified by column chromatography (Al<sub>2</sub>O<sub>3</sub>, CH<sub>2</sub>Cl<sub>2</sub>/ *n*-pentane, 1:1). After drying compound **9** was isolated as a colorless oil 0.42 g (92%). The obtained oil slowly crystallized over night at room temperature. The formed colorless crystals were suitable for the X-ray crystal structure analysis.

**X-Ray crystal structure analysis of compound **9**:** formula C<sub>22</sub>H<sub>29</sub>P, *M* = 324.42, colourless crystal, 0.220 x 0.180 x 0.100 mm, *a* = 8.3322(2), *b* = 8.5865(3), *c* = 13.0867(4) Å, *α* = 87.833(1), *β* = 85.945(1), *γ* = 86.322(1)°, *V* = 931.5(1) Å<sup>3</sup>, *ρ*<sub>calc</sub> = 1.157 gcm<sup>-3</sup>, *μ* = 1.262 mm<sup>-1</sup>, empirical absorption correction (0.769 ≤ *T* ≤ 0.884), *Z* = 2, triclinic, space group *P* $\bar{1}$  (No. 2), *λ* = 1.54178 Å, *T* = 100(2) K, *ω* and *φ* scans, 23717 reflections collected, 3344 independent (*R*<sub>int</sub> = 0.044) and 2937 observed reflections [*I* > 2σ(*I*)], 242 refined parameters, *R* = 0.035, *wR*<sup>2</sup> = 0.092, max. (min.) residual electron density 0.30 (-0.27) e.Å<sup>-3</sup>, hydrogen atoms were calculated and refined as riding atoms.

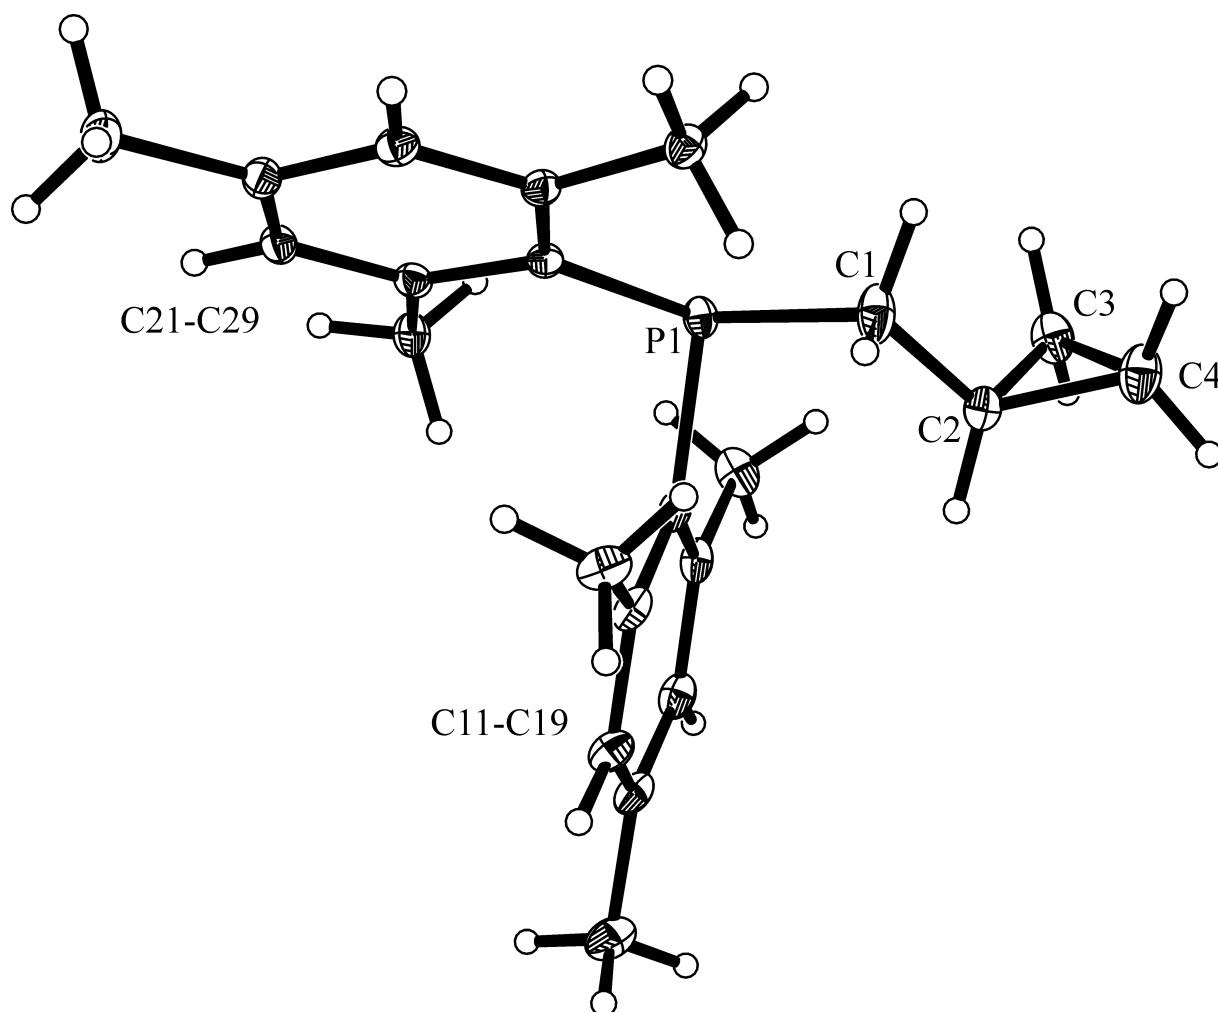

**HRMS** (MicroTof):  $M+H^+$  ( $C_{22}H_{29}PH^+$ ): Calcd.: 325.2080, Found: 325.2087.

**Elemental analysis:** Calcd. for  $C_{22}H_{29}P$ : C, 81.44; H, 9.01. Found: C, 78.05; H, 8.76.

To improve the elemental analysis the crystals of compound **9** were dissolved in dichloromethane and passed through a pipette filled with  $Al_2O_3$ . After removal of the solvent, the obtained white solid was crushed and then dried at 50 °C for 8 h.

**Elemental analysis:** Calcd. for  $C_{22}H_{29}P$ : C, 81.44; H, 9.01. Found: C, 80.72; H, 8.58.

A solution of the colorless oil before workup (mixture of compounds **8** and **9**, see below) in  $C_6D_6$  were passed through a pipette filled with  $Al_2O_3$  and then rinsed with dichloromethane (2 mL). After removal of the solvent in vacuo, the obtained white solid was crushed and then dried at 50 °C for 8 h.

**Elemental analysis:** Calcd. for  $C_{22}H_{29}P$ : C, 81.44; H, 9.01. Found: C, 81.47; H, 8.76.

NMR data of the crystalline material in CD<sub>2</sub>Cl<sub>2</sub> (compound **9**).

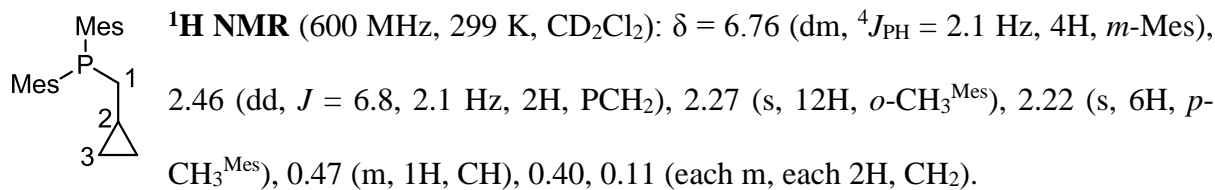

<sup>13</sup>C{<sup>1</sup>H} NMR (151 MHz, 299 K, CD<sub>2</sub>Cl<sub>2</sub>): δ = 142.2 (d, <sup>2</sup>J<sub>PC</sub> = 13.3 Hz, *o*-Mes), 137.7 (*p*-Mes), 134.0 (d, <sup>1</sup>J<sub>PC</sub> = 22.8 Hz, *i*-Mes), 130.0 (d, <sup>3</sup>J<sub>PC</sub> = 2.8 Hz, *m*-Mes), 33.9 (d, <sup>1</sup>J<sub>PC</sub> = 16.0 Hz, PCH<sub>2</sub>), 23.2 (d, <sup>3</sup>J<sub>PC</sub> = 13.4 Hz, *o*-CH<sub>3</sub><sup>Mes</sup>), 20.9 (*p*-CH<sub>3</sub><sup>Mes</sup>), 9.2 (d, <sup>2</sup>J<sub>PC</sub> = 20.5 Hz, CH), 6.5 (d, <sup>3</sup>J<sub>PC</sub> = 10.2 Hz, CH<sub>2</sub>).

<sup>1</sup>H{<sup>1</sup>H} TOCSY (600 MHz, 299 K, CD<sub>2</sub>Cl<sub>2</sub>)[selected experiments]: δ<sup>1</sup>H<sub>irr</sub>/δ<sup>1</sup>H<sub>res</sub> = 2.46/0.50, 0.43, 0.14 (1-H/ 2-H, 3-H).

<sup>31</sup>P{<sup>1</sup>H} NMR (243 MHz, 299 K, CD<sub>2</sub>Cl<sub>2</sub>): δ = -24.6 (ν<sub>1/2</sub> ~ 3 Hz).

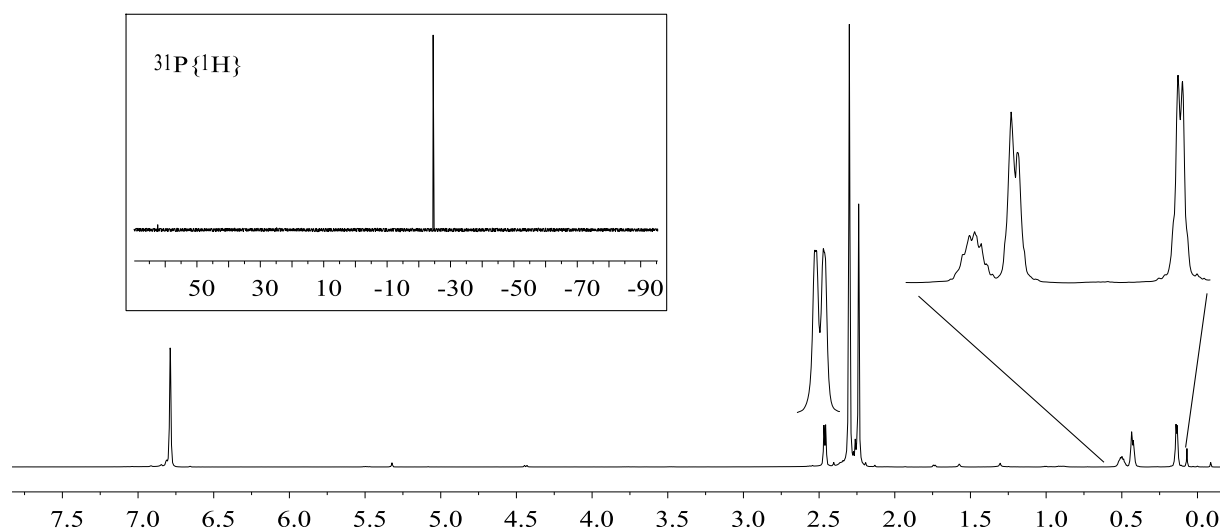

<sup>1</sup>H NMR (600 MHz, 299 K, CD<sub>2</sub>Cl<sub>2</sub>) and <sup>31</sup>P{<sup>1</sup>H} NMR (243 MHz, 299 K, CD<sub>2</sub>Cl<sub>2</sub>) spectra of compound **9**.

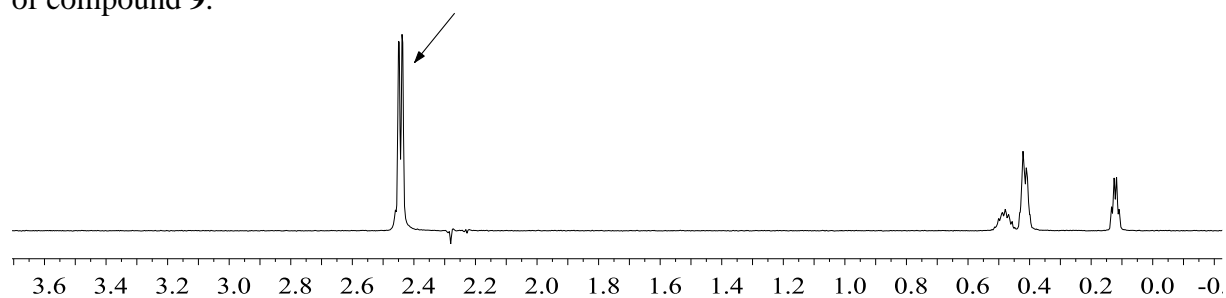

<sup>1</sup>H{<sup>1</sup>H} TOCSY (600 MHz, 299 K, CD<sub>2</sub>Cl<sub>2</sub>) spectrum of compound **9** (irradiation (arrow) at 2.46 ppm, response at 0.50, 0.43, 0.14 ppm)

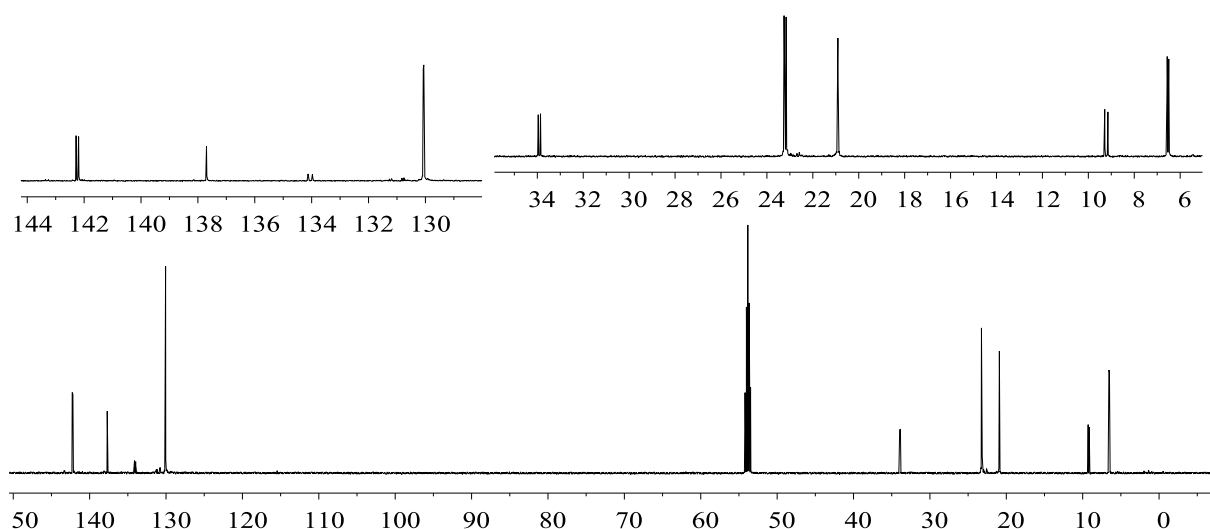

$^{13}\text{C}\{^1\text{H}\}$  NMR (151 MHz, 299 K,  $\text{CD}_2\text{Cl}_2$ ) spectrum of compound **9**.

*Colorless oil before workup (see above):* Reaction of compound **5** with  $\text{HB}(\text{C}_6\text{F}_5)_2$  resulted in a reaction mixture of compound **9** and borane **8** (1:1 ( $^1\text{H}$ )).

Borane **8** (in  $\text{C}_6\text{D}_6$ ):

$^1\text{H}$  NMR (600 MHz, 299 K,  $\text{C}_6\text{D}_6$ ):  $\delta = 0.04$  (s,  $^1J_{\text{SiH}} = 6.7$  Hz, 1H,  $\text{SiMe}_3$ ).

$^{13}\text{C}\{^1\text{H}\}$  NMR (151 MHz, 299 K,  $\text{C}_6\text{D}_6$ ):  $\delta = 148.2$  (dm,  $^1J_{\text{CF}} \sim 245$  Hz,  $\text{C}_6\text{F}_5$ ),  $143.2$  (dm,  $^1J_{\text{CF}} \sim 265$  Hz,  $\text{C}_6\text{F}_5$ ),  $137.4$  (dm,  $^1J_{\text{CF}} \sim 250$  Hz,  $\text{C}_6\text{F}_5$ ),  $131.6$  (br,  $i\text{-C}_6\text{F}_5$ ),  $0.4$  ( $^1J_{\text{SiC}} = 60.2$  Hz,  $\text{SiMe}_3$ ).

$^{11}\text{B}\{^1\text{H}\}$  NMR (192 MHz, 299 K,  $\text{C}_6\text{D}_6$ ):  $\delta = 38.1$  ( $\nu_{1/2} \sim 350$  Hz).

$^{19}\text{F}$  NMR (564 MHz, 299 K,  $\text{C}_6\text{D}_6$ ):  $\delta = -133.3$  (m, 2F,  $o\text{-C}_6\text{F}_5$ ),  $-148.9$  (tt,  $J_{\text{FF}} = 20.8, 3.6$  Hz, 1F,  $p\text{-C}_6\text{F}_5$ ),  $-161.3$  (m, 2F,  $m\text{-C}_6\text{F}_5$ ). [ $\Delta\delta^{19}\text{F}_{\text{m,p}} = 12.5$ ].

$^1\text{H}, ^{29}\text{Si}$  GHMQC (600 MHz/ 119 MHz, 299 K,  $\text{C}_6\text{D}_6$ ):  $\delta^1\text{H}/ \delta^{29}\text{Si} = 0.04/ 20.2$  ( $\text{OSiMe}_3$ ).

Compound **9** (in  $\text{C}_6\text{D}_6$ ):

$^1\text{H}$  NMR (600 MHz, 299 K,  $\text{C}_6\text{D}_6$ ):  $\delta = 6.69$  (s, 4H,  $m\text{-Mes}$ ),  $2.40$  (m, 2H,  $\text{PCH}_2$ ),  $2.36$  (s, 12H,  $o\text{-CH}_3^{\text{Mes}}$ ),  $2.08$  (s, 6H,  $p\text{-CH}_3^{\text{Mes}}$ ),  $0.52$  (m, 1H, CH),  $0.32, 0.10$  (each m, each 2H,  $\text{CH}_2$ ).

**$^{13}\text{C}\{^1\text{H}\}$  NMR** (151 MHz, 299 K,  $\text{C}_6\text{D}_6$ ):  $\delta$  = 142.1 (d,  $^2J_{\text{PC}}$  = 13.4 Hz, *o*-Mes), 137.3 (*p*-Mes), 134.3 (d,  $^1J_{\text{PC}}$  = 24.0 Hz, *i*-Mes), 130.3 (*m*-Mes), 34.9 (d,  $^1J_{\text{PC}}$  = 16.0 Hz,  $\text{PCH}_2$ ), 23.3 (d,  $^3J_{\text{PC}}$  = 13.6 Hz, *o*- $\text{CH}_3^{\text{Mes}}$ ), 20.8 (*p*- $\text{CH}_3^{\text{Mes}}$ ), 9.3 (d,  $^2J_{\text{PC}}$  = 20.5 Hz, CH), 6.7 (d,  $^3J_{\text{PC}}$  = 10.2 Hz,  $\text{CH}_2$ ).

**$^{31}\text{P}\{^1\text{H}\}$  NMR** (243 MHz, 299 K,  $\text{C}_6\text{D}_6$ ):  $\delta$  = -24.4 ( $\nu_{1/2}$  ~ 5 Hz).

**$^1\text{H}, ^{31}\text{P}$  GHMQC** (600 MHz/ 243 MHz, 299 K,  $\text{C}_6\text{D}_6$ ):  $\delta^1\text{H}/ \delta^{31}\text{P}$  = 6.69, 2.40, 2.36, 2.08, 0.52, 0.32, 0.10/ -24.4 (*m*-Mes,  $\text{PCH}_2$ , *o*- $\text{CH}_3^{\text{Mes}}$ , *p*- $\text{CH}_3^{\text{Mes}}$ , CH,  $\text{CH}_2$ ,  $\text{CH}_2/\text{P}$ ).

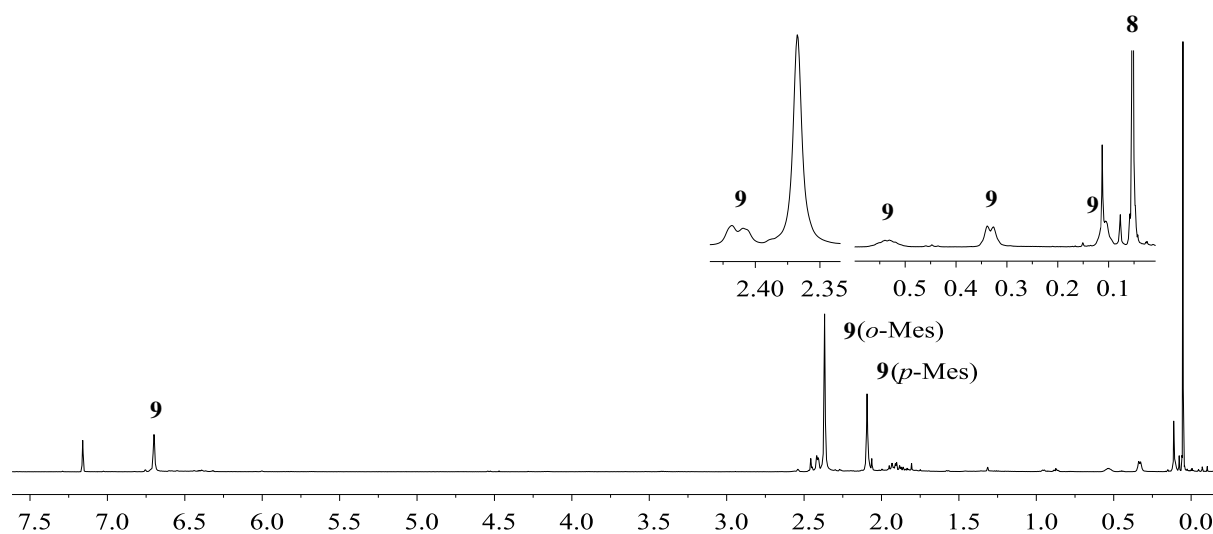

**$^1\text{H}$  NMR** (600 MHz, 299 K,  $\text{C}_6\text{D}_6$ ) spectrum of the reaction mixture of compounds **8** and **9**.

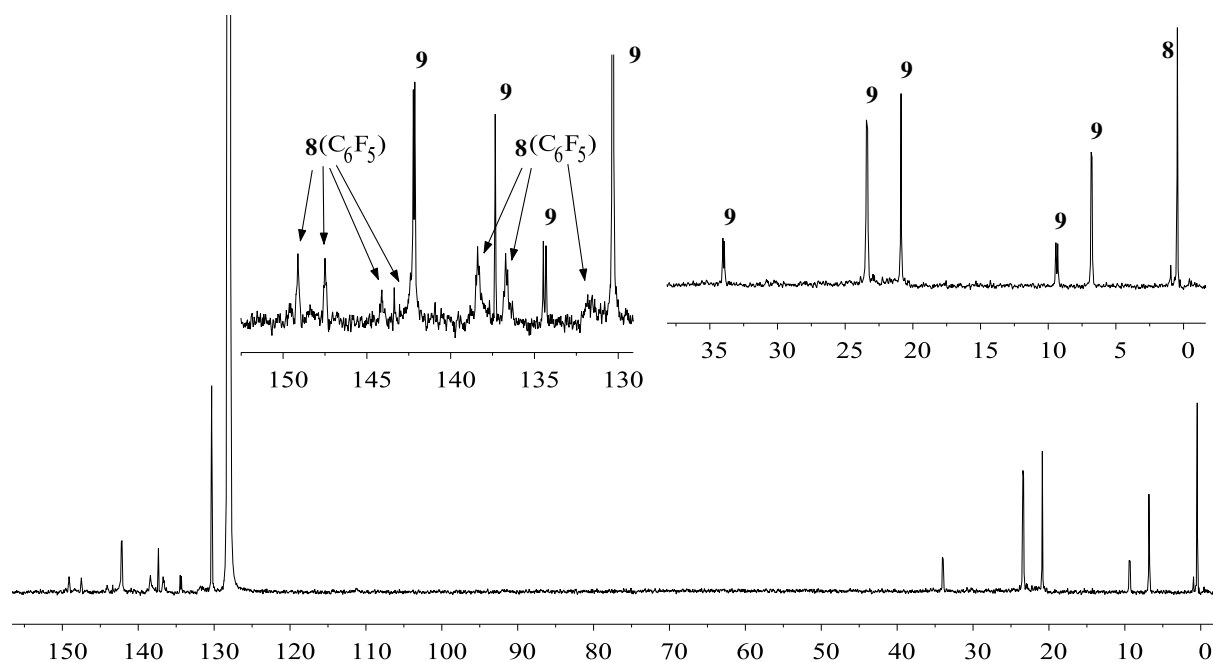

$^{13}\text{C}\{^1\text{H}\}$  NMR (151 MHz, 299 K,  $\text{C}_6\text{D}_6$ ) spectrum of the reaction mixture of compounds **8** and **9**.

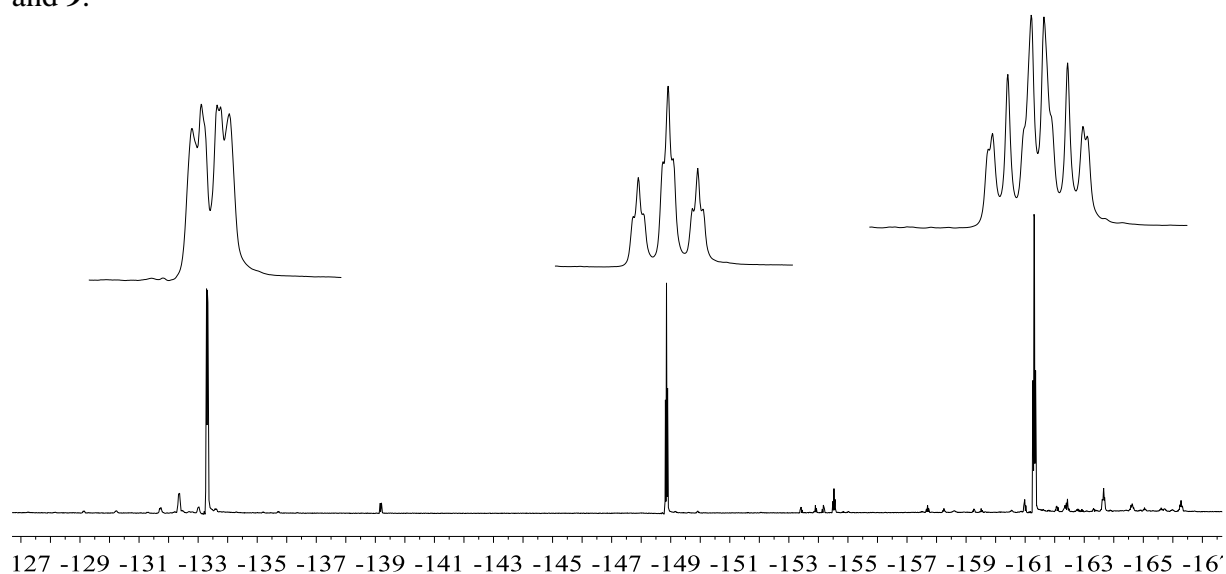

$^{19}\text{F}$  NMR (564 MHz, 299 K,  $\text{C}_6\text{D}_6$ ) spectrum of the reaction mixture of compounds **8** and **9**.

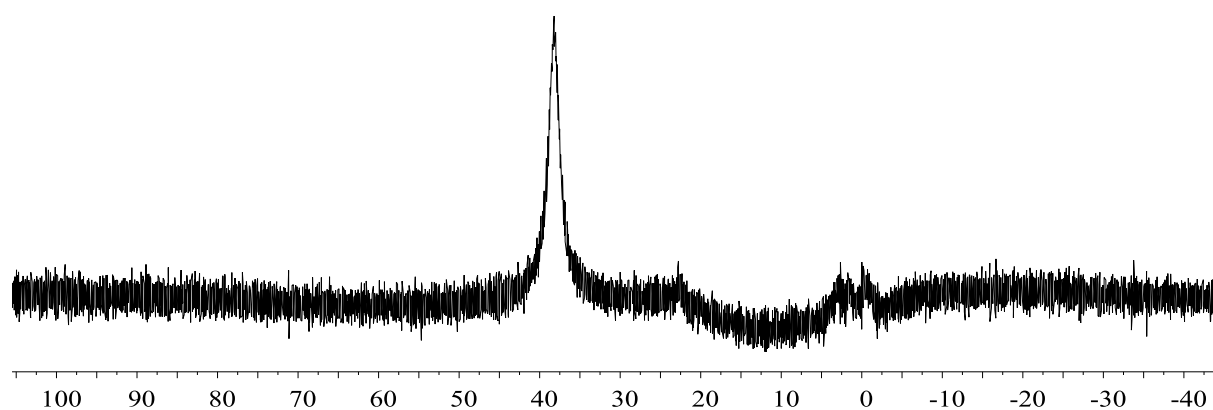

$^{11}\text{B}\{^1\text{H}\}$  NMR (192 MHz, 299 K,  $\text{C}_6\text{D}_6$ ) spectrum of the reaction mixture of compounds **8** and **9**.

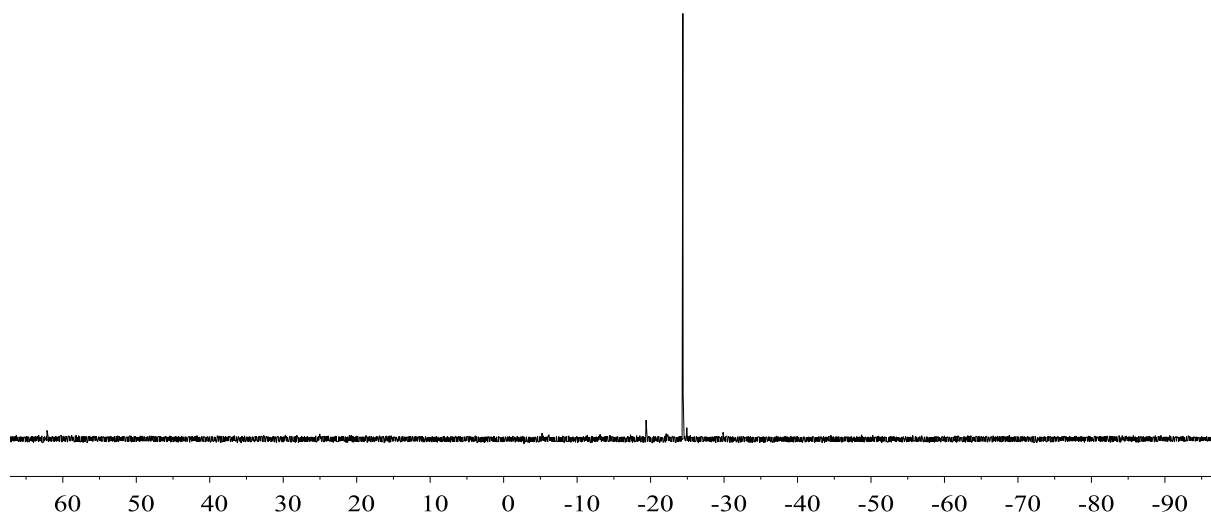

**$^{31}\text{P}\{^1\text{H}\}$  NMR** (243 MHz, 299 K,  $\text{C}_6\text{D}_6$ ) spectrum of the reaction mixture of compounds **8** and **9**.

*2<sup>nd</sup> Experiment (reaction monitoring by DNMR).* A solution of dimesityl(1-(trimethylsilyloxy)but-3-en-2-yl)phosphane **5** (30 mg,  $8.8 \times 10^{-2}$  mmol) in deuterated dichloromethane (0.3 mL) was added to a Yong-NMR tube filled with a solution of  $\text{HB}(\text{C}_6\text{F}_5)_2$  (26 mg,  $7.5 \times 10^{-2}$  mmol) in deuterated dichloromethane (0.3 mL) at  $-78^\circ\text{C}$ . The reaction progress was monitored by NMR spectroscopy at various temperatures.

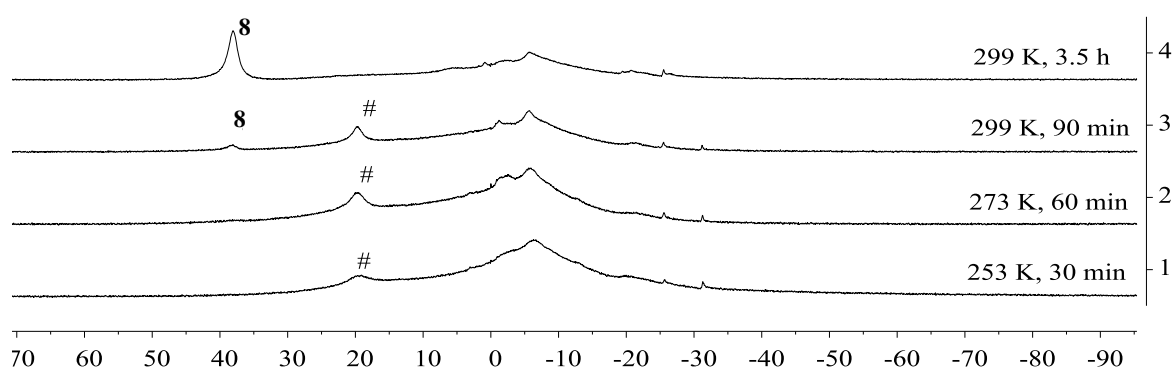

**$^{11}\text{B}\{^1\text{H}\}$  VTNMR** (160 MHz,  $\text{CD}_2\text{Cl}_2$ ) spectra of the reaction of compound **5** with  $\text{HB}(\text{C}_6\text{F}_5)_2$ . [temperature, overall reaction time; #  $\text{HB}(\text{C}_6\text{F}_5)_2$ ].

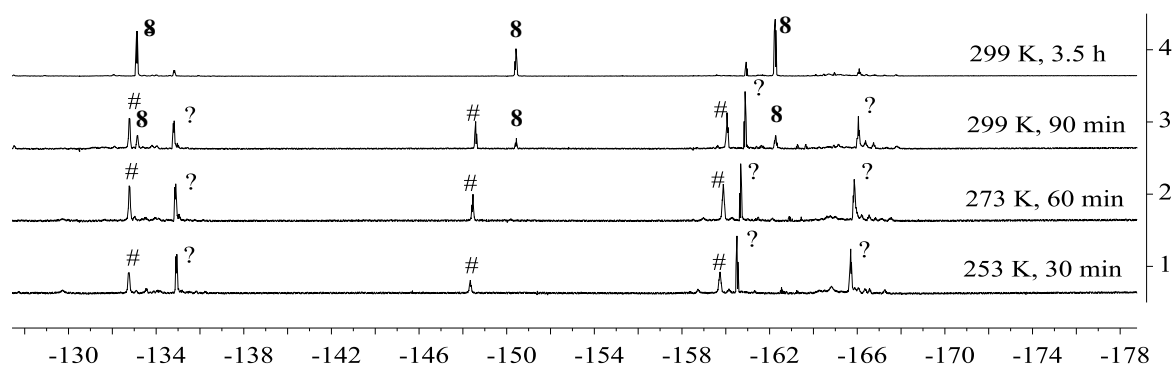

**$^{19}\text{F}$  VTNMR** (470 MHz, 253–299K,  $\text{CD}_2\text{Cl}_2$ ) spectra of the reaction of compound **5** with  $\text{HB}(\text{C}_6\text{F}_5)_2$ . [temperature, overall reaction time; #  $\text{HB}(\text{C}_6\text{F}_5)_2$ , ? unidentified compound].

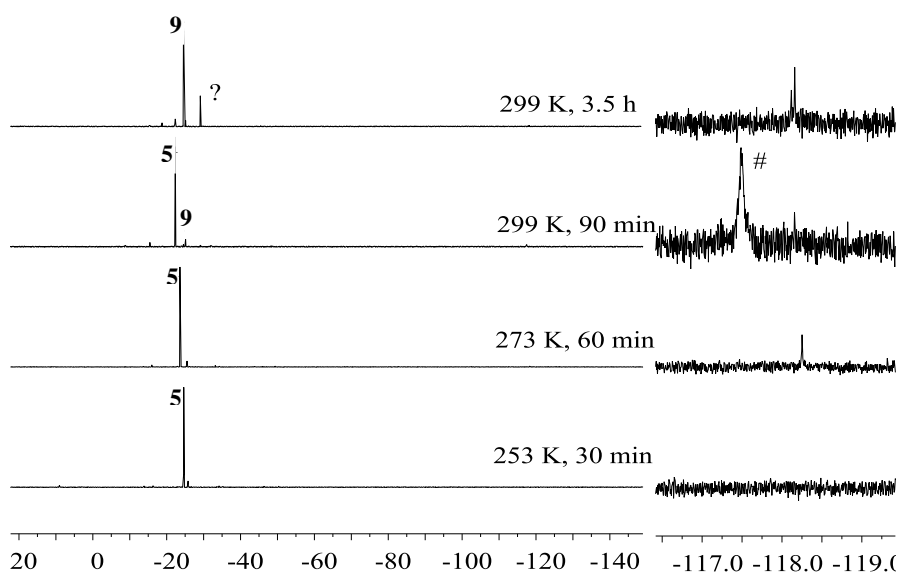

**$^{31}\text{P}\{^1\text{H}\}$  VTNMR** (202 MHz,  $\text{CD}_2\text{Cl}_2$ ) spectra of the reaction of compound **5** with  $\text{HB}(\text{C}_6\text{F}_5)_2$ . [temperature, overall reaction time; ? unidentified compound, # tentatively assigned as phosphiranium intermediate **7** (**5** : **9** : **7** ~ 84 : 6 : 10)].

### Synthesis of compound 10.

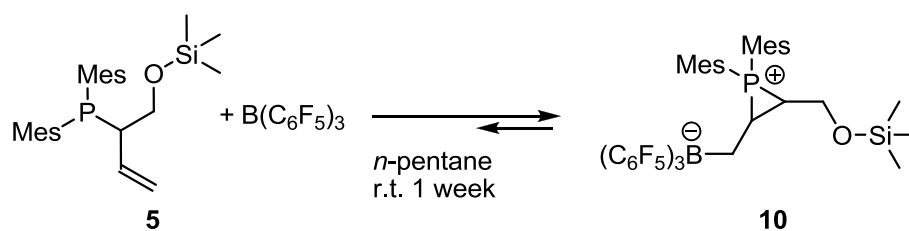

Compound **5** (0.290 g, 0.70 mmol) and tris(pentafluorophenyl)borane (0.360 g, 0.70 mmol) were dissolved in dry  $n$ -pentane (5 mL) under an atmosphere of argon and stirred for 1 week at ambient temperature. During this time a white precipitate was formed, which was isolated by filtration. It was washed thrice with  $n$ -pentane (2 mL) and dried *in vacuo* to give a white solid (0.500 g, 77%).

Crystals suitable for the X-ray crystal structure analysis were obtained from a saturated solution of the white solid in  $\text{CH}_2\text{Cl}_2$  at  $-30\text{ }^\circ\text{C}$ . The crystals were collected, washed with pentane, dried *in vacuo* and dissolved in  $\text{CD}_2\text{Cl}_2$  for NMR spectroscopic characterization (*Comment*: Compound **10** slowly gives at room temperature in  $\text{CD}_2\text{Cl}_2$  solution the starting materials back (Compound **5** and  $\text{B}(\text{C}_6\text{F}_5)_3$ ) (0.25/1 ratio by  $^1\text{H}$  NMR)).

**Elemental analysis** (crystals): Calcd. for  $\text{C}_{43}\text{H}_{37}\text{BF}_{15}\text{OPSi}(1\times\text{CH}_2\text{Cl}_2)$ : C, 52.35; H, 3.89. Found: C, 52.36; H, 3.87.

**X-Ray crystal structure analysis of compound 10**: formula  $\text{C}_{43}\text{H}_{37}\text{BF}_{15}\text{OPSi}$ ,  $M = 924.60$ , colourless crystal,  $0.23 \times 0.10 \times 0.05\text{ mm}$ ,  $a = 10.8091(2)$ ,  $b = 25.3584(3)$ ,  $c = 16.9567(4)\text{ \AA}$ ,  $\beta = 96.133(1)^\circ$ ,  $V = 4621.2(2)\text{ \AA}^3$ ,  $\rho_{\text{calc}} = 1.329\text{ gcm}^{-3}$ ,  $\mu = 0.177\text{ mm}^{-1}$ , empirical absorption correction ( $0.960 \leq T \leq 0.991$ ),  $Z = 4$ , monoclinic, space group  $P2_1/c$  (No. 14),  $\lambda = 0.71073\text{ \AA}$ ,  $T = 223(2)\text{ K}$ ,  $\omega$  and  $\phi$  scans, 32591 reflections collected ( $\pm h, \pm k, \pm l$ ), 8012 independent ( $R_{\text{int}} = 0.064$ ) and 5621 observed reflections [ $I > 2\sigma(I)$ ], 568 refined parameters,  $R = 0.070$ ,  $wR^2 = 0.196$ , max. (min.) residual electron density  $0.36\text{ }(-0.33)\text{ e.\AA}^{-3}$ , hydrogen atoms were calculated and refined as riding atoms.

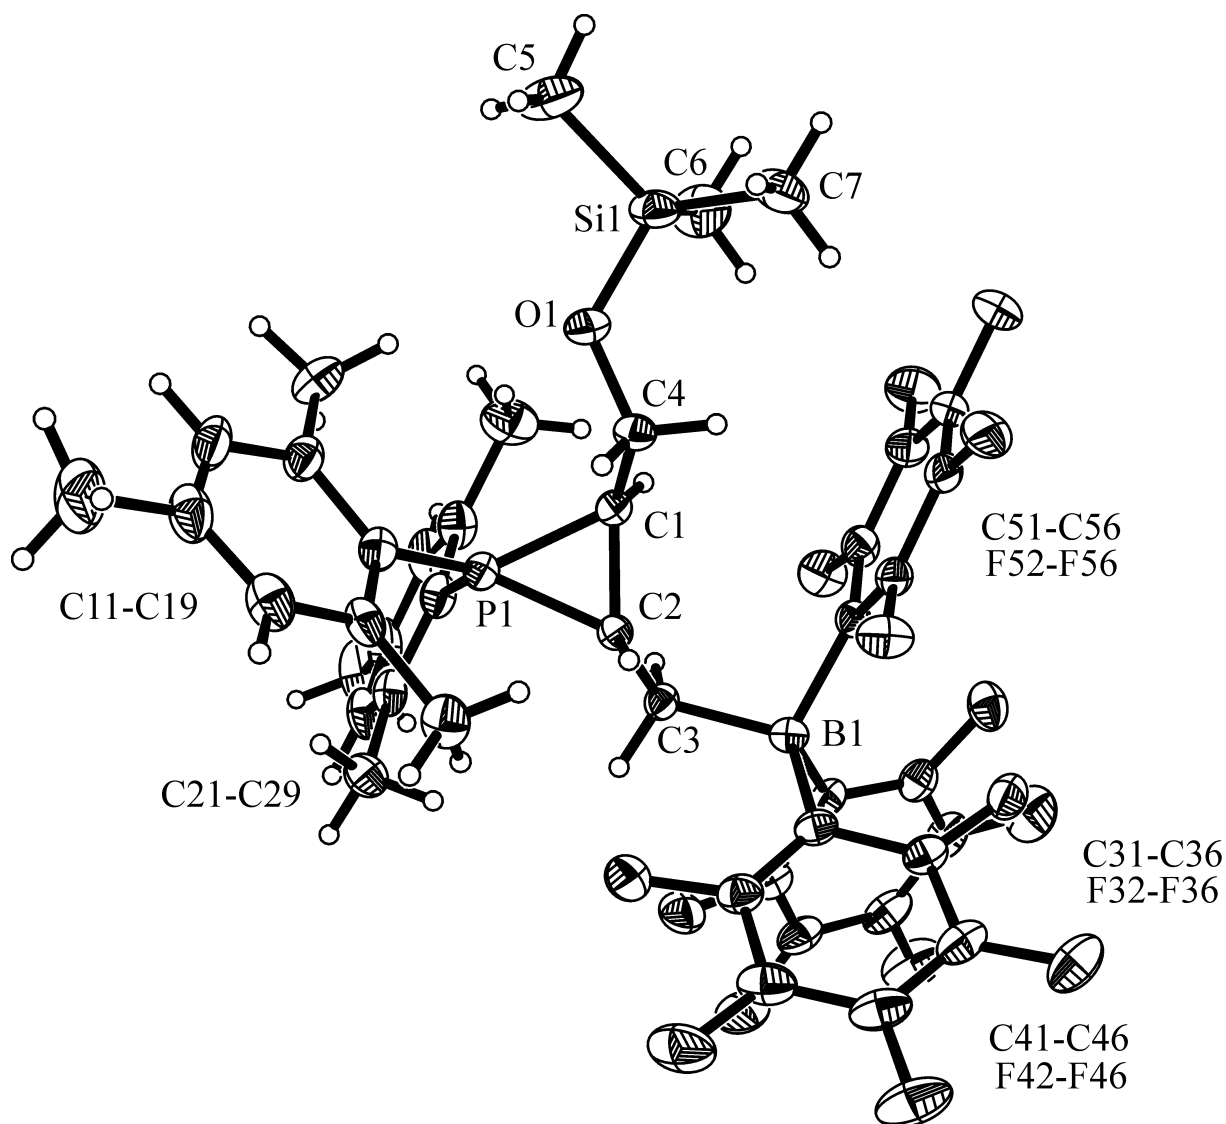

A solution of the obtained crystals in  $\text{CD}_2\text{Cl}_2$  was characterized by NMR experiments. A mixture of compound **10**, compound **5** and  $\text{B}(\text{C}_6\text{F}_5)_3$  was observed (**10** : **5** ~ 78 : 22 ( $^1\text{H}$ )).

NMR data of compound **5** are consistent to those listed above.

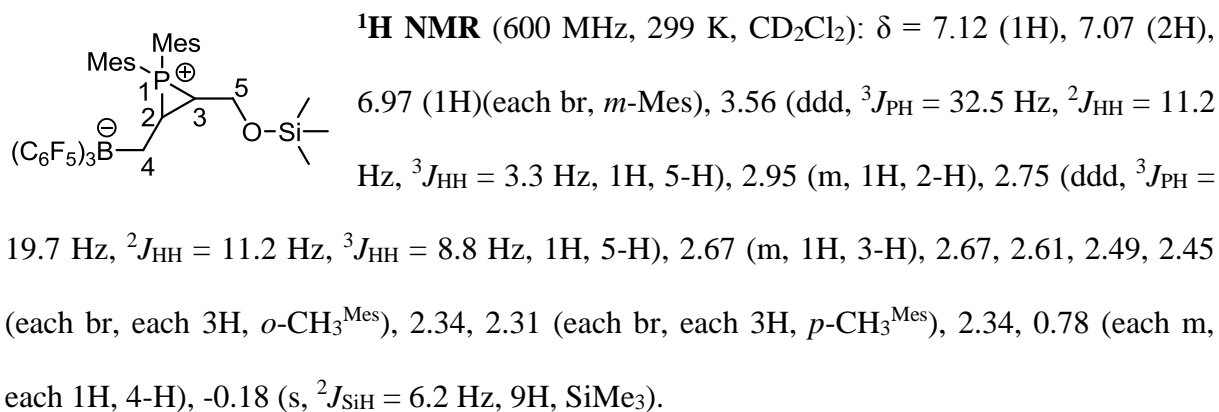

**$^{13}\text{C}\{^1\text{H}\}$  NMR** (151 MHz, 299 K,  $\text{CD}_2\text{Cl}_2$ ):  $\delta$  = 148.6 (dm,  $^1J_{\text{FC}} \sim 240$  Hz,  $\text{C}_6\text{F}_5$ ), 147.0, 146.0, 145.4, 145.3 (each br, *o*-Mes), 146.2, 146.1 (each d,  $^4J_{\text{PC}} = 3.2$  Hz, *p*-Mes), 138.6 (dm,  $^1J_{\text{FC}} \sim 240$ ,  $\text{C}_6\text{F}_5$ ), 137.0 (dm,  $^1J_{\text{FC}} \sim 250$ ,  $\text{C}_6\text{F}_5$ ), 132.1, 131.7, 131.2, 131.2 (each br, *m*-Mes), 125.3 (br, *i*- $\text{C}_6\text{F}_5$ ), 111.8 (d,  $^1J_{\text{PC}} = 80.4$  Hz), 111.2 (d,  $^1J_{\text{PC}} = 88.5$  Hz)(*i*-Mes), 60.2 (d,  $^2J_{\text{PC}} = 7.0$  Hz, C5), 41.4 (d,  $^1J_{\text{PC}} = 2.0$  Hz, C3), 37.9 (d,  $^1J_{\text{PC}} = 10.9$  Hz, C2), 23.7 (br), 23.2 (br), 22.9 (br)(*o*- $\text{CH}_3^{\text{Mes}}$ ), 21.5, 21.4 (each d,  $J = 0.9$  Hz, *p*- $\text{CH}_3^{\text{Mes}}$ ), 21.5 (br, C4), -1.6 ( $^1J_{\text{SiC}} = 59.0$  Hz,  $\text{SiMe}_3$ ).

**$^1\text{H}, ^1\text{H}$  GCOSY** (600 MHz/ 600 MHz, 299 K,  $\text{CD}_2\text{Cl}_2$ ) [selected trace]:  $\delta^1\text{H}/ \delta^1\text{H} = 2.95/ 2.67$ , 2.34, 0.78 (2-H/ 3-H, 4-H, 4-H).

**$^1\text{H}\{^1\text{H}\}$  TOCSY** (600 MHz, 299 K,  $\text{CD}_2\text{Cl}_2$ ) [selected spectrum]:  $\delta^1\text{H}_{\text{irr}}/ \delta^1\text{H}_{\text{res}} = 2.95/ 2.67$ , 2.34, 0.79 (2-H / 3-H, 4-H, 4-H).

**$^1\text{H}, ^{13}\text{C}$  GHSQC** (600 MHz/ 151 MHz, 299 K,  $\text{CD}_2\text{Cl}_2$ ):  $\delta^1\text{H}/ \delta^{13}\text{C} = 7.12/ 132.1$ , 7.07/ 131.7, 6.97/ 131.2 (*m*-Mes), 3.56/ 60.2 (C5), 2.75/ 60.2 (C5), 2.95/ 37.9 (C2), 2.67/ 41.4 (C3), 2.67/ 23.7, 2.61/ 23.2, 2.49/ 22.9, 2.45/ 22.9 (*o*- $\text{CH}_3^{\text{Mes}}$ ), 2.34/ 21.5 (C4), 0.78/ 21.5 (C4), 2.34/ 21.5, 2.31/ 21.4 (*p*- $\text{CH}_3^{\text{Mes}}$ ), -0.18/ -1.6 ( $\text{SiMe}_3$ ).

**$^1\text{H}, ^{13}\text{C}$  GHMBC** (600 MHz/ 151 MHz, 299 K,  $\text{CD}_2\text{Cl}_2$ ) [selected traces]:  $\delta^1\text{H}/ \delta^{13}\text{C} = 2.67/ 145.4$ , 132.1, 111.8 (*o*- $\text{CH}_3^{\text{Mes}}$ / *o*-Mes, *m*-Mes, *i*-Mes), 2.34/ 146.1, 132.1, 131.2 (*p*- $\text{CH}_3^{\text{Mes}}$ / *p*-Mes, *m*-Mes, *m*-Mes).

**$^{11}\text{B}\{^1\text{H}\}$  NMR** (192 MHz, 299 K,  $\text{CD}_2\text{Cl}_2$ ):  $\delta$  = -13.8 (d,  $J \sim 14$  Hz, **10**), 59.1 ( $\nu_{1/2} \sim 800$  Hz,  $\text{B}(\text{C}_6\text{F}_5)_3$ ).

**$^{11}\text{B}$  NMR** (192 MHz, 299 K,  $\text{CD}_2\text{Cl}_2$ ):  $\delta$  = -13.8 ( $\nu_{1/2} \sim 50$  Hz), 59.1 ( $\nu_{1/2} \sim 800$  Hz,  $\text{B}(\text{C}_6\text{F}_5)_3$ ).

**$^{19}\text{F}$  NMR** (564 MHz, 299 K,  $\text{CD}_2\text{Cl}_2$ ): compound **10**:  $\delta$  = -132.4 (m, 2F, *o*), -162.6 (t,  $^3J_{\text{FF}} = 20.3$  Hz, 1F *p*), -166.3 (m, 2F, *m*)( $\text{C}_6\text{F}_5$ )[ $\Delta\delta^{19}\text{F} = 3.7$ ],  $\text{B}(\text{C}_6\text{F}_5)_3$ :  $\delta$  = -128.2 (br m, 2F, *o*), -143.8 (br, 1F *p*), -161.0 (br m, 2F, *m*)( $\text{C}_6\text{F}_5$ )[ $\Delta\delta^{19}\text{F} = 17.2$ ].

$^{29}\text{Si}\{^1\text{H}\}$  DEPT (119 MHz, 299 K,  $\text{CD}_2\text{Cl}_2$ ):  $\delta = 21.0$  ( $\nu_{1/2} \sim 1$  Hz).

$^{31}\text{P}\{^1\text{H}\}$  NMR (202 MHz, 299 K,  $\text{CD}_2\text{Cl}_2$ ):  $\delta = -114.2$  (m, **10**),  $-22.4$  ( $\nu_{1/2} \sim 25$  Hz, **5**). [after 1 week].

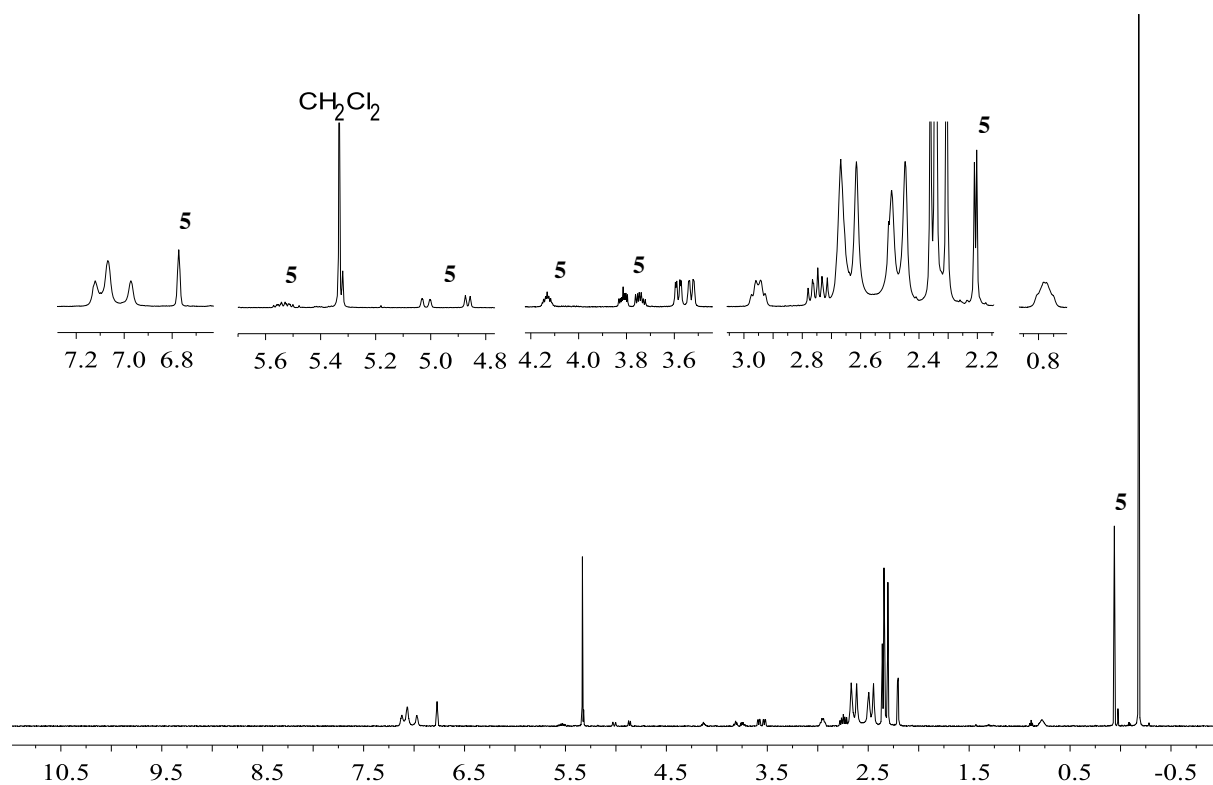

$^1\text{H}$  NMR (600 MHz, 299 K,  $\text{CD}_2\text{Cl}_2$ ) spectrum of the solution of the crystals of compound **10** in  $\text{CD}_2\text{Cl}_2$  (admixed with compound **5** and  $\text{CH}_2\text{Cl}_2$ ).

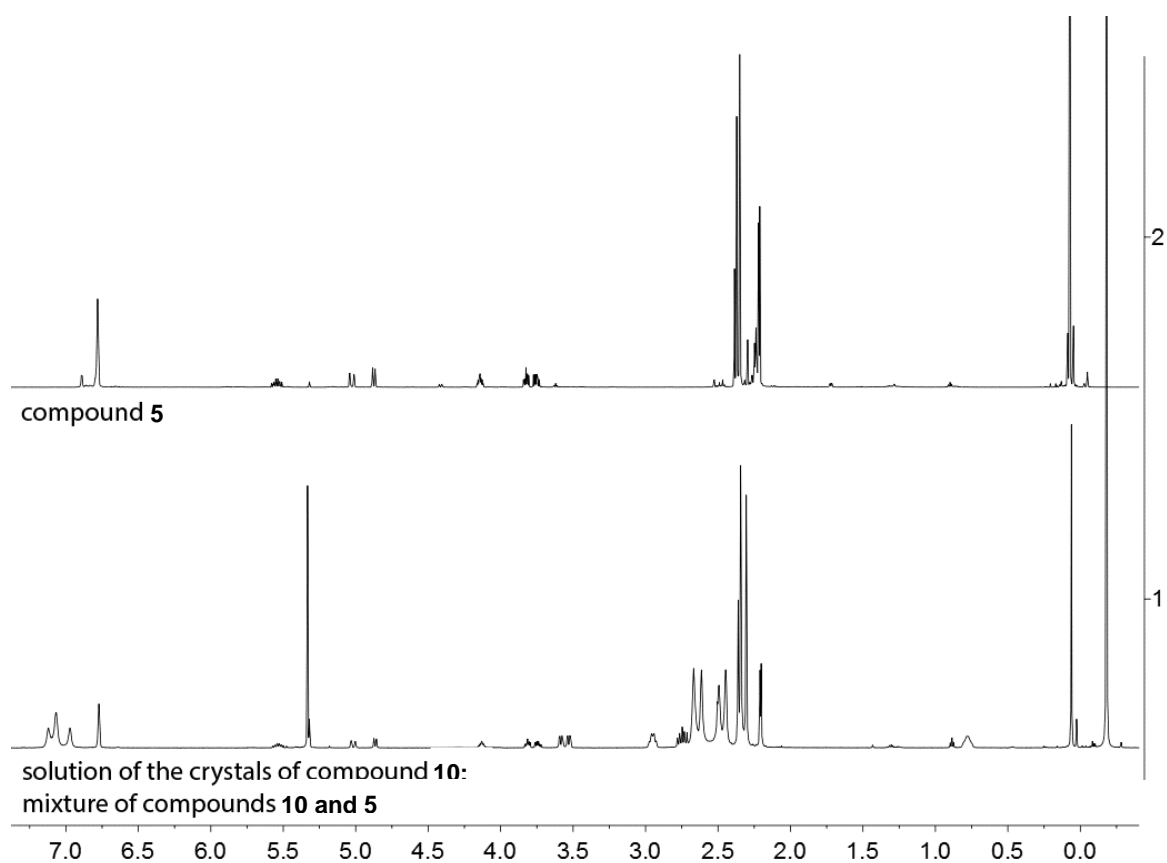

**$^1\text{H}$  NMR** (600 MHz, 299 K,  $\text{CD}_2\text{Cl}_2$ ) spectra of compound **10** and **5**. (1) Solution of the crystals of compound **10** in  $\text{CD}_2\text{Cl}_2$ ; (2) compound **5** (see above).

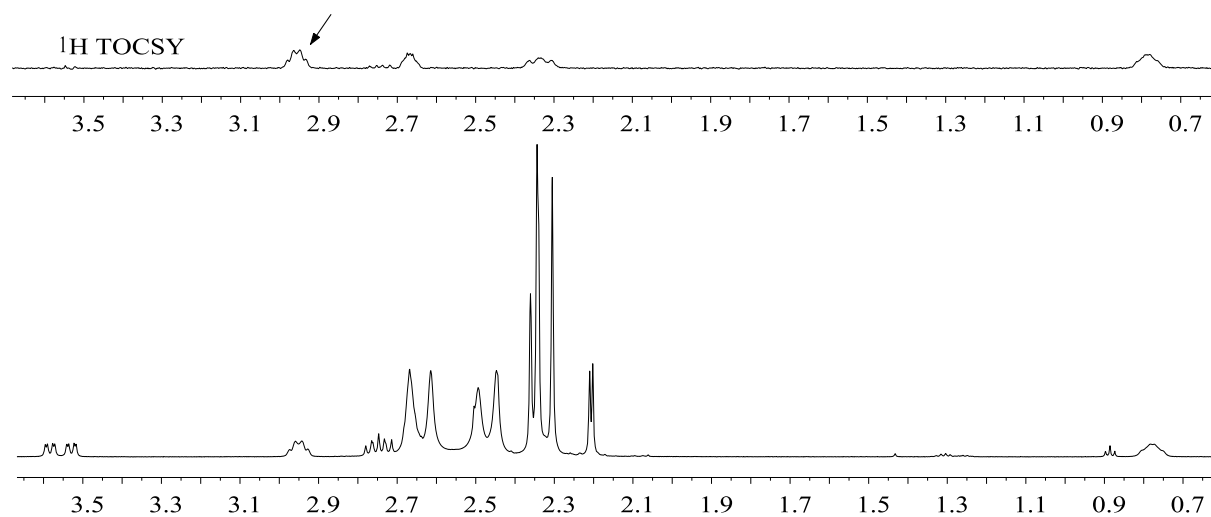

**$^1\text{H}$  NMR** (600 MHz, 299 K,  $\text{CD}_2\text{Cl}_2$ ) and  **$^1\text{H}\{^1\text{H}\}$  TOCSY** (600 MHz, 299 K,  $\text{CD}_2\text{Cl}_2$ ) spectra of compound **10** (irradiation (arrow) at 2.95 ppm, response at 2.75, 2.67, 2.34, 0.78 ppm).

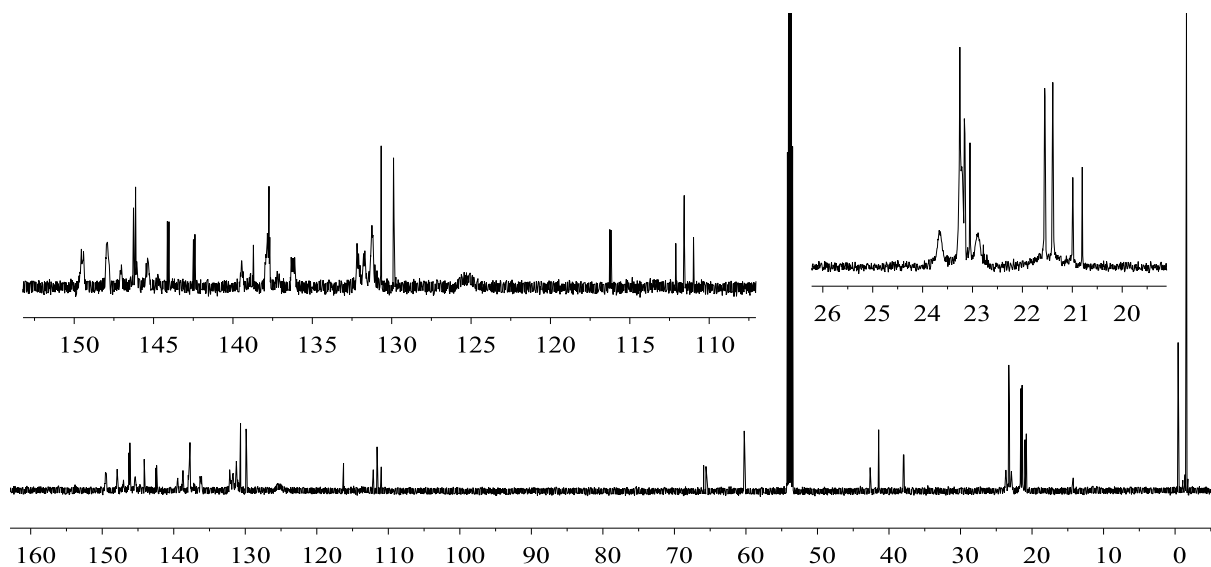

$^{13}\text{C}\{^1\text{H}\}$  NMR (151 MHz, 299 K,  $\text{CD}_2\text{Cl}_2$ ) spectrum of the solution of the crystals of compound **10** in  $\text{CD}_2\text{Cl}_2$  (admixed with compound **5**).

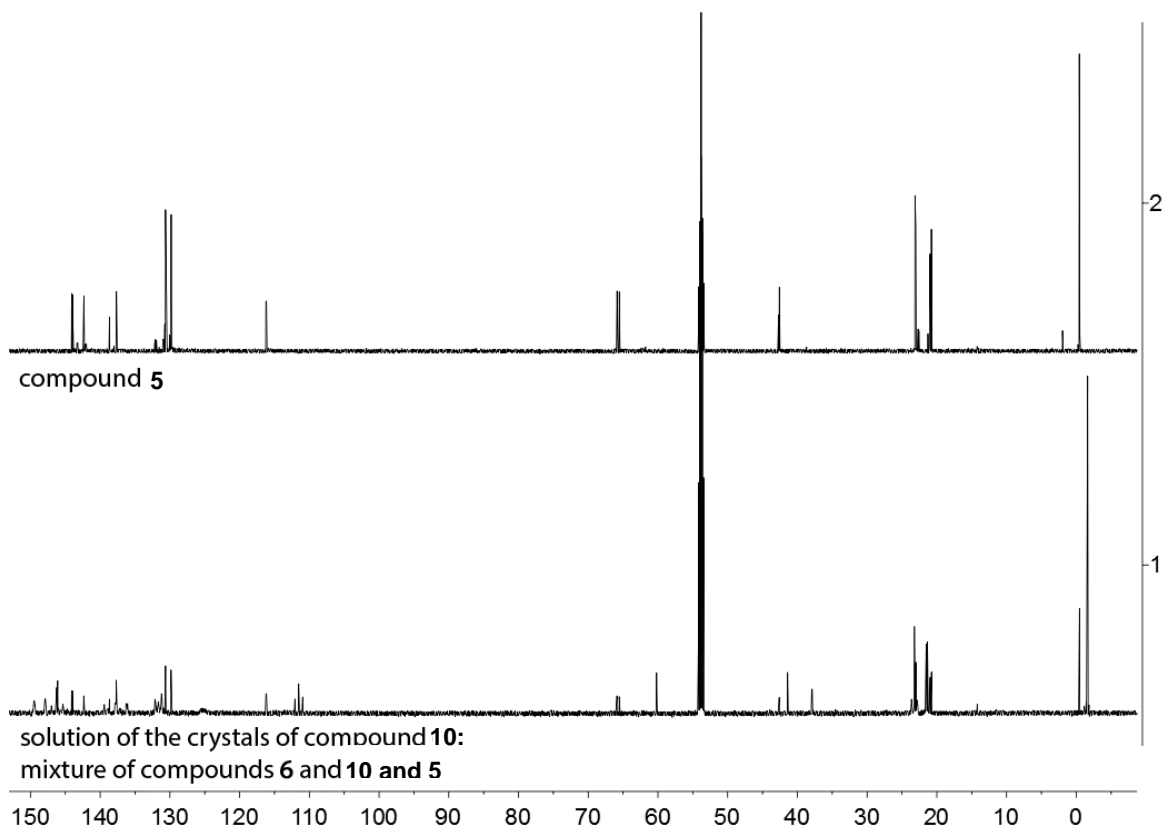

$^{13}\text{C}\{^1\text{H}\}$  NMR (151 MHz, 299 K,  $\text{CD}_2\text{Cl}_2$ ) spectra of compound **10** and **5**. (1) Solution of the crystals of compound **10** in  $\text{CD}_2\text{Cl}_2$ ; (2) compound **5** (see above).

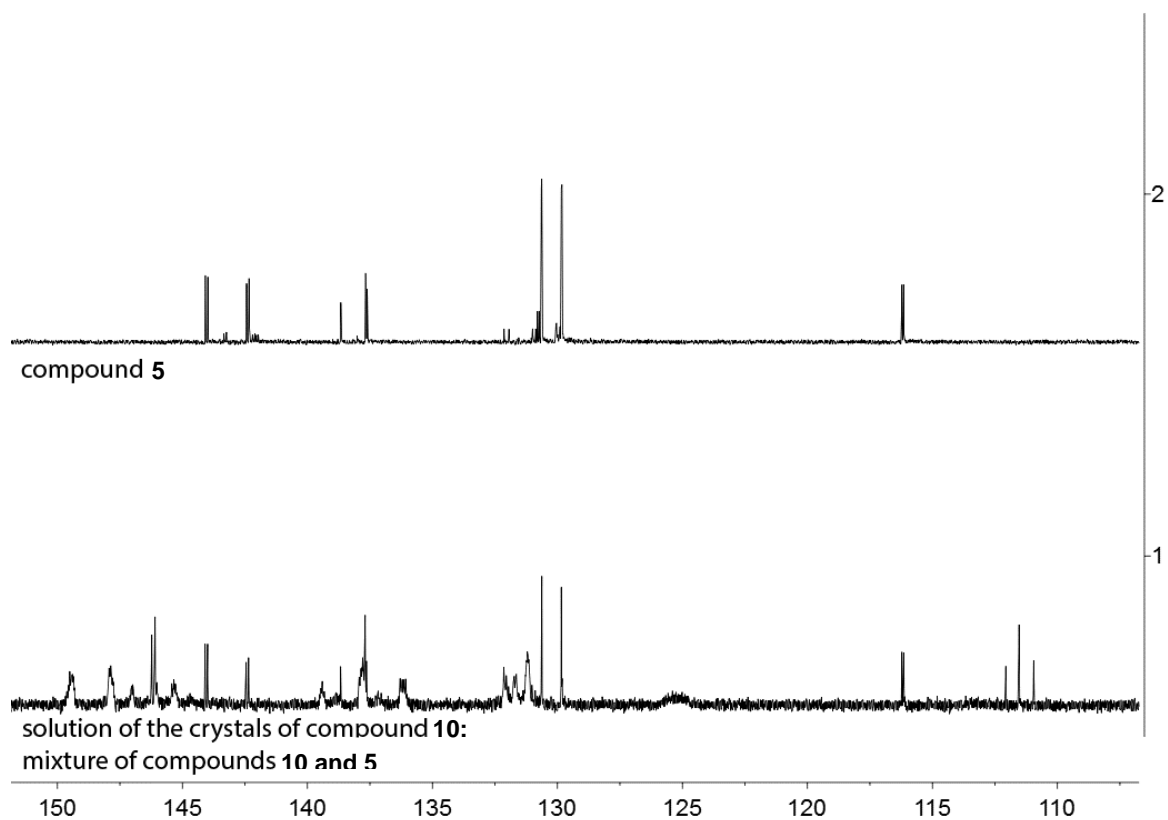

$^{13}\text{C}\{^1\text{H}\}$  NMR (151 MHz, 299 K,  $\text{CD}_2\text{Cl}_2$ ) spectra of compounds **10** and **5**. (1) Solution of the crystals of compound **10** in  $\text{CD}_2\text{Cl}_2$ ; (2) compound **5** (see above).

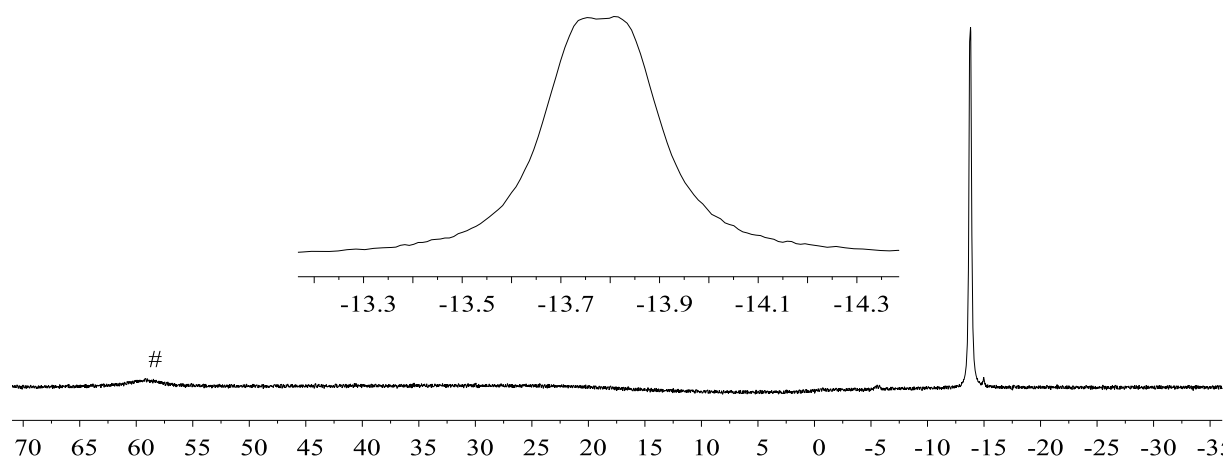

$^{11}\text{B}\{^1\text{H}\}$  NMR (192 MHz, 299 K,  $\text{CD}_2\text{Cl}_2$ ) spectrum of compound **10**. [#  $\text{B}(\text{C}_6\text{F}_5)_3$ ].

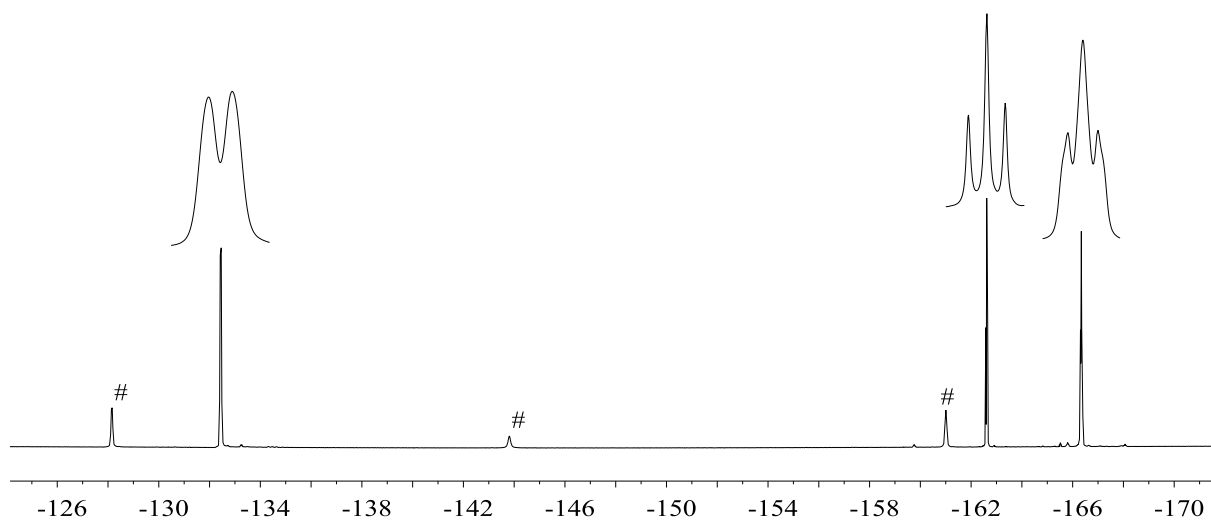

$^{19}\text{F}$  NMR (564 MHz, 299 K,  $\text{CD}_2\text{Cl}_2$ ) spectrum of compound **10** (#  $\text{B}(\text{C}_6\text{F}_5)_3$ ).

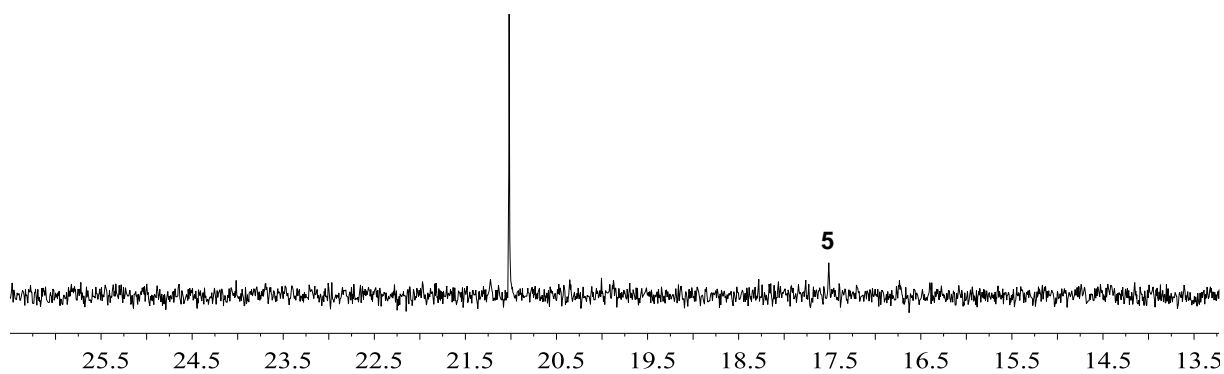

$^{29}\text{Si}\{^1\text{H}\}$  DEPT (119 MHz, 299 K,  $\text{CD}_2\text{Cl}_2$ ) spectrum of compound **10**.

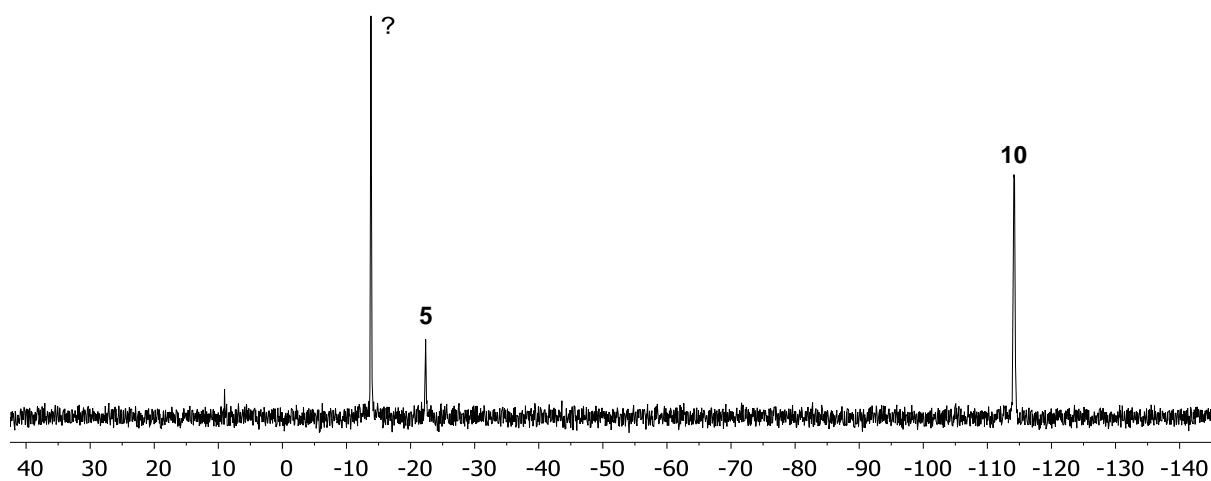

$^{31}\text{P}\{^1\text{H}\}$  NMR (202 MHz, 299 K,  $\text{CD}_2\text{Cl}_2$ ) spectrum) of compound **10**. [? unidentified compound]. Note: This spectrum was measured after 1 week in  $\text{CD}_2\text{Cl}_2$  solution.

A solution of the obtained white solid (before workup) in  $\text{CD}_2\text{Cl}_2$  was characterized by NMR experiments.

$^{11}\text{B}\{^1\text{H}\}$  NMR (96 MHz, 299 K,  $\text{CD}_2\text{Cl}_2$ ):  $\delta = -13.8$  (d,  $J \sim 14$  Hz).

$^{31}\text{P}\{^1\text{H}\}$  NMR (121 MHz, 299K,  $\text{CD}_2\text{Cl}_2$ ):  $\delta = -114.2$  (m).

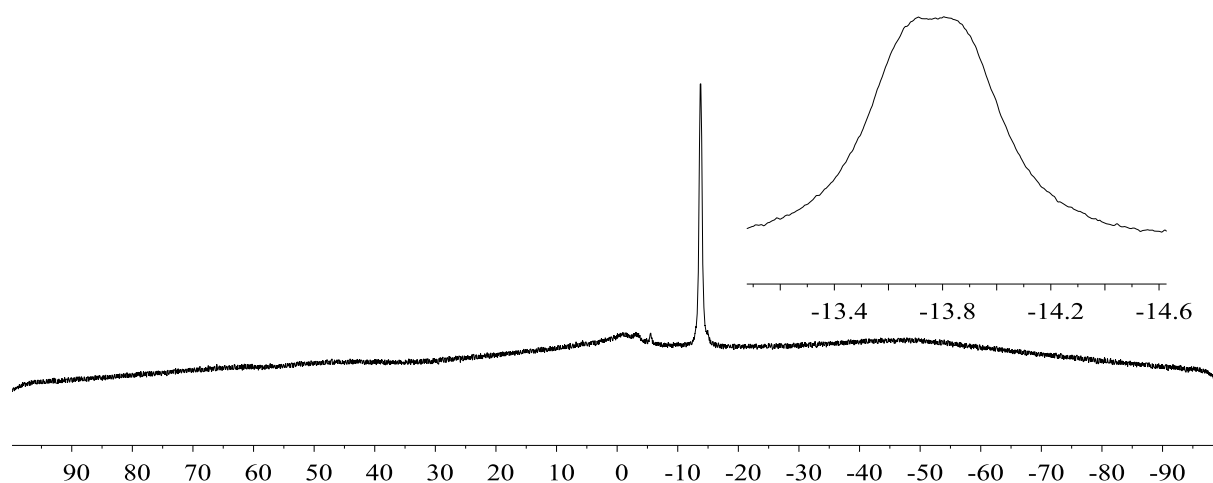

$^{11}\text{B}\{^1\text{H}\}$  NMR (96 MHz, 299 K,  $\text{CD}_2\text{Cl}_2$ ) spectrum of the white solid.

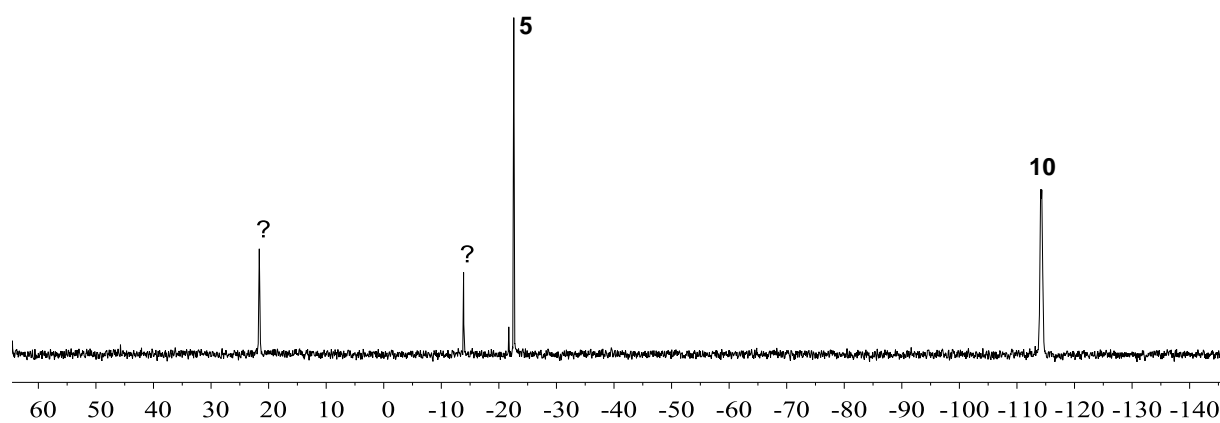

$^{31}\text{P}\{^1\text{H}\}$  NMR (121 MHz, 299 K,  $\text{CD}_2\text{Cl}_2$ ) spectrum of the white solid. [? unknown compounds].

## Preparation of compound 11.

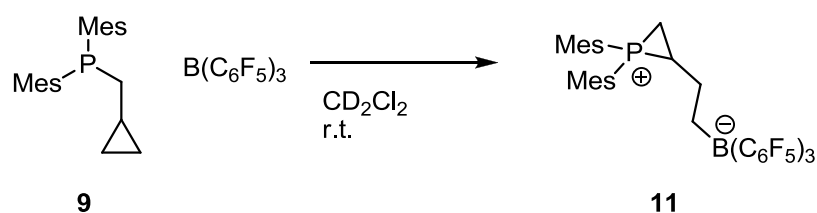

*1<sup>st</sup> Experiment.* Compound **9** (50 mg, 0.1541 mmol) and B(C<sub>6</sub>F<sub>5</sub>)<sub>3</sub> (78.9 mg, 0.1541 mmol) were dissolved in CH<sub>2</sub>Cl<sub>2</sub> (2 mL) and stirred at ambient temperature for 30 min. Then all volatiles were removed in *vacuo*. The residue was crystallized from toluene/*n*-pentane solution at -30 °C to give a white microcrystalline solid (35 mg, 27%).

**Elemental analysis:** Calcd. for C<sub>40</sub>H<sub>29</sub>BF<sub>15</sub>P (+ 1/6 toluene): C, 58.17; H, 3.61. Found: C, 58.64; H, 3.59.

**<sup>1</sup>H NMR** (600 MHz, 299 K, CD<sub>2</sub>Cl<sub>2</sub>): δ = 7.07, 7.05 (each d, <sup>4</sup>J<sub>PH</sub> = 5.8 Hz, each 2H, *m*-Mes), 3.15 (m, 1H, PCH), 2.61, 2.50 (each s, each 6H, *o*-CH<sub>3</sub><sup>Mes</sup>), 2.50 (m, 2H, PCH<sub>2</sub>) 2.37, 2.33 (each s, each 3H, *p*-CH<sub>3</sub><sup>Mes</sup>), 1.45 (m, 2H, BCH<sub>2</sub>), 1.34, 0.97 (each m, each 1H, CH<sub>2</sub>).

**<sup>13</sup>C{<sup>1</sup>H} NMR** (151 MHz, 299 K, CD<sub>2</sub>Cl<sub>2</sub>): δ = 148.4 (dm, <sup>1</sup>J<sub>FC</sub> ~ 240 Hz, C<sub>6</sub>F<sub>5</sub>), 147.3, 146.8 (each d, <sup>4</sup>J<sub>PC</sub> = 3.3 Hz, *p*-Mes), 145.7 (br d, <sup>2</sup>J<sub>PC</sub> = 10.5 Hz), 145.1 (d, <sup>2</sup>J<sub>PC</sub> = 11.3 Hz)(*o*-Mes), 138.0 (dm, <sup>1</sup>J<sub>FC</sub> ~ 250 Hz, C<sub>6</sub>F<sub>5</sub>), 136.7 (dm, <sup>1</sup>J<sub>FC</sub> ~ 245 Hz, C<sub>6</sub>F<sub>5</sub>), 131.8 (br d, <sup>3</sup>J<sub>PC</sub> = 13.8 Hz), 131.7 (d, <sup>3</sup>J<sub>PC</sub> = 13.3 Hz)(*m*-Mes), 126.5 (br, *i*-C<sub>6</sub>F<sub>5</sub>), 113.5 (d, <sup>1</sup>J<sub>PC</sub> = 84.8 Hz), 109.0 (d, <sup>1</sup>J<sub>PC</sub> = 89.4 Hz)(*i*-Mes), 35.1 (br d, <sup>1</sup>J<sub>PC</sub> = 4.2 Hz, PCH), 28.4 (d, <sup>1</sup>J<sub>PC</sub> = 5.0 Hz, CH<sub>2</sub>), 23.4, 23.2 (each d, <sup>3</sup>J<sub>PC</sub> = 7.9 Hz, *o*-CH<sub>3</sub><sup>Mes</sup>), 22.8 (br m, BCH<sub>2</sub>), 22.4 (PCH<sub>2</sub>), 21.5, 21.3 (each br, *p*-CH<sub>3</sub><sup>Mes</sup>).

**<sup>11</sup>B{<sup>1</sup>H} NMR** (192 MHz, 299 K, CD<sub>2</sub>Cl<sub>2</sub>): δ = -13.6 (ν<sub>1/2</sub> ~ 65 Hz).

**<sup>19</sup>F NMR** (564 MHz, 299 K, CD<sub>2</sub>Cl<sub>2</sub>): δ = -133.1 (m, 2F, *o*-C<sub>6</sub>F<sub>5</sub>), -164.0 (t, <sup>3</sup>J<sub>FF</sub> = 20.3 Hz, 1F, *p*-C<sub>6</sub>F<sub>5</sub>), -167.1 (m, 2F, *m*-C<sub>6</sub>F<sub>5</sub>). [Δδ<sup>19</sup>F<sub>m,p</sub> = 3.1].

$^{31}\text{P}\{^1\text{H}\}$  NMR (243 MHz, 299 K,  $\text{CD}_2\text{Cl}_2$ ):  $\delta$  -117.7 ( $\nu_{1/2} \sim 2$  Hz).

$^{31}\text{P}$  NMR (243 MHz, 299 K,  $\text{CD}_2\text{Cl}_2$ ):  $\delta$  -117.7 (dm,  $J \sim 25$  Hz).

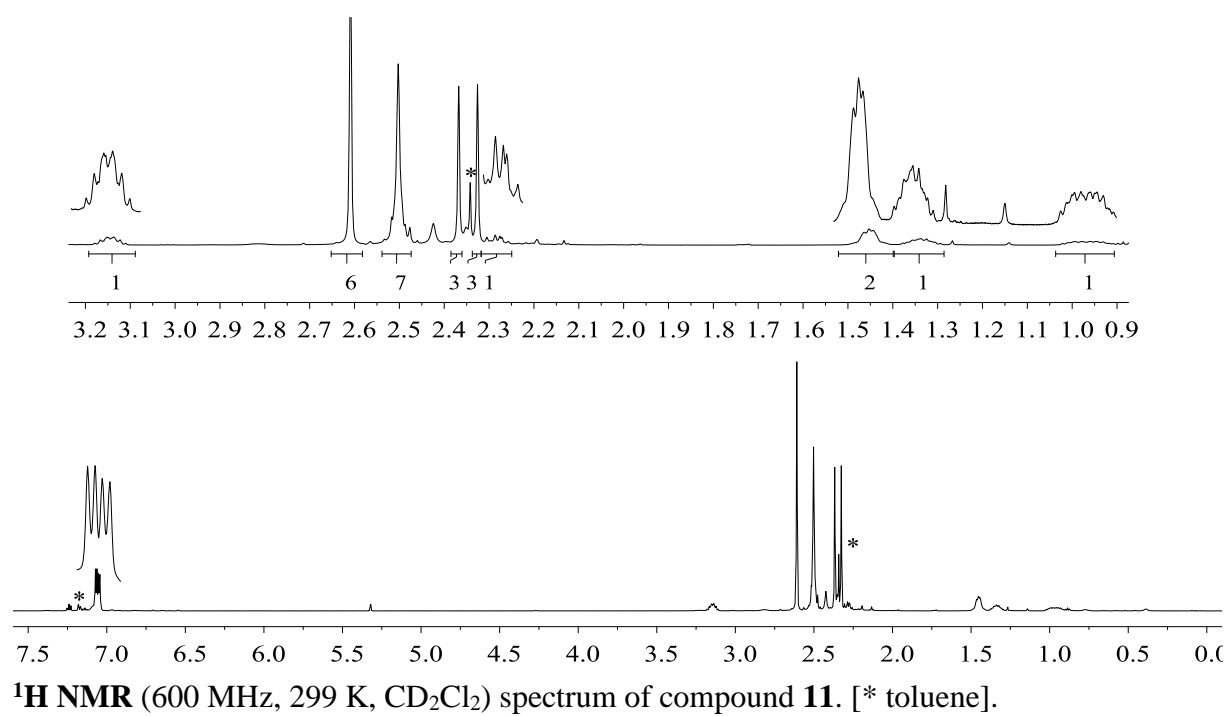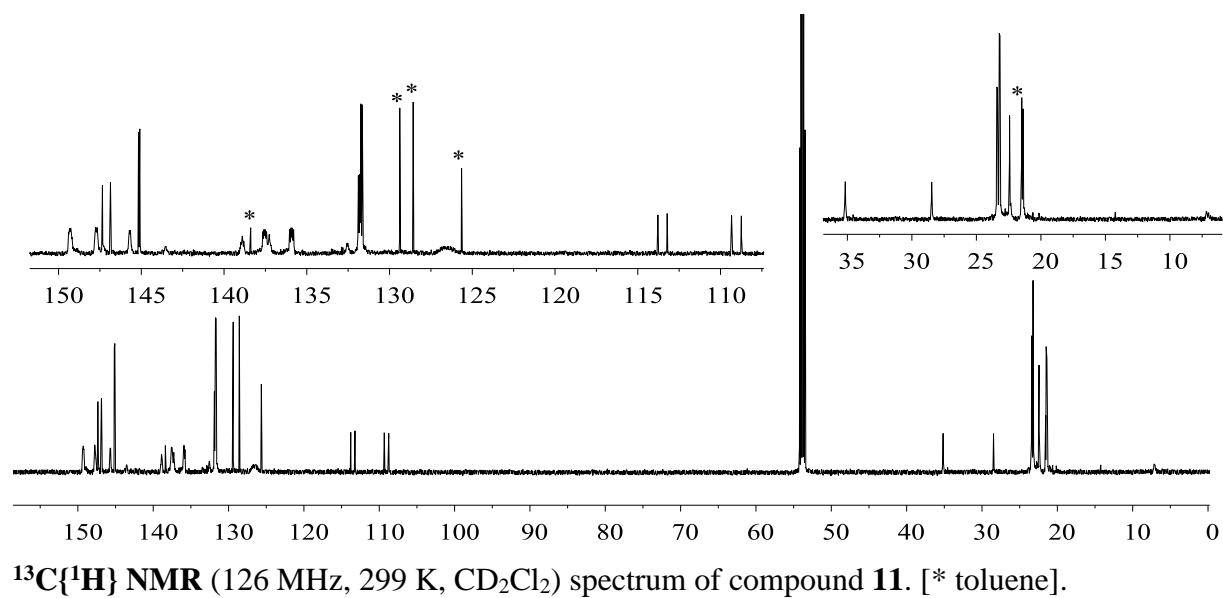

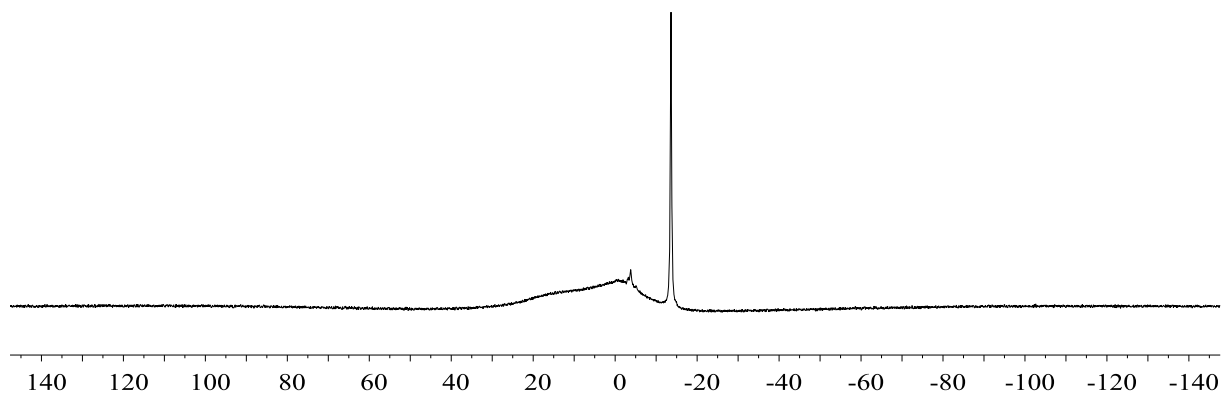

$^{11}\text{B}\{^1\text{H}\}$  NMR (192 MHz, 299 K,  $\text{CD}_2\text{Cl}_2$ ) spectrum of compound **11**.

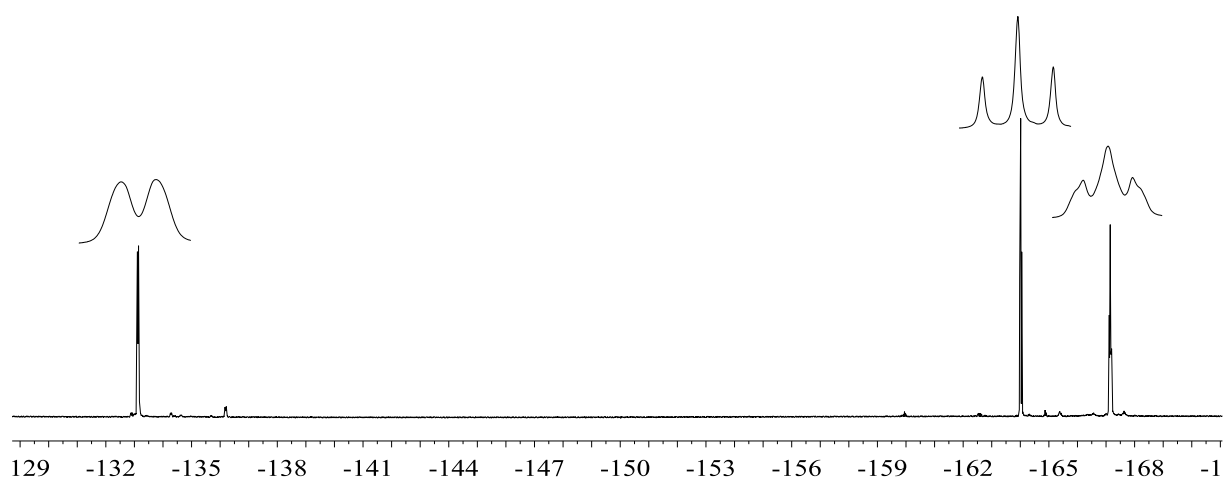

$^{19}\text{F}$  NMR (564 MHz, 299 K,  $\text{CD}_2\text{Cl}_2$ ) spectrum of compound **11**.

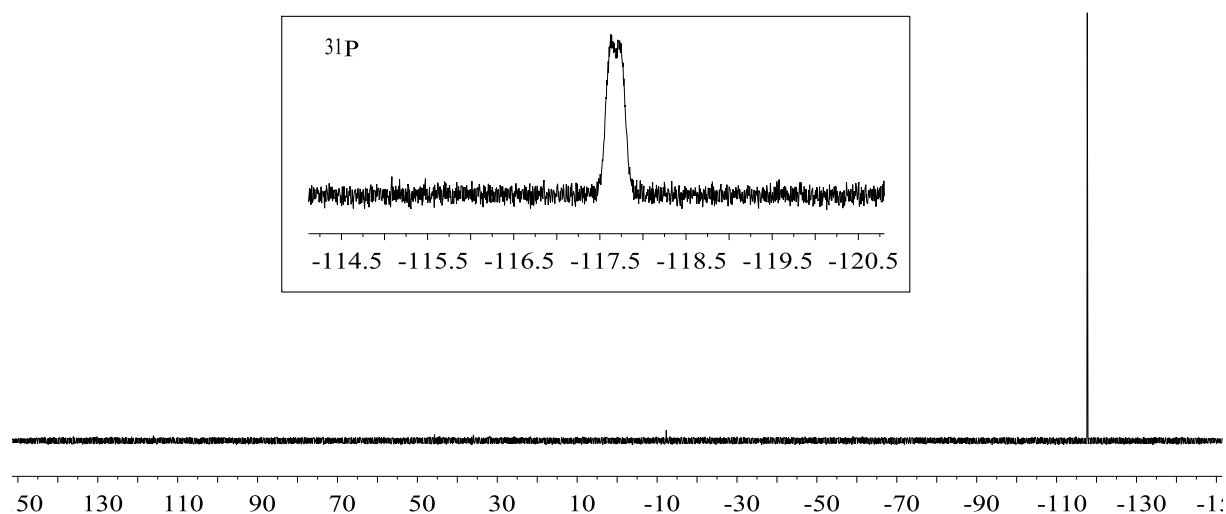

$^{31}\text{P}\{^1\text{H}\}$  NMR (247 MHz, 299 K,  $\text{CD}_2\text{Cl}_2$ ) and  $^{31}\text{P}$  NMR (247 MHz, 299 K,  $\text{CD}_2\text{Cl}_2$ ) spectra of compound **11**.

2<sup>nd</sup> Experiment (*in situ*, NMR scale). Compound **9** (50 mg, 0.1541 mmol) and B(C<sub>6</sub>F<sub>5</sub>)<sub>3</sub> (78.9 mg, 0.1541 mmol) were added in a NMR tube and dissolved in deuterated dichloromethane (0.6 mL). After 10 min the reaction mixture was characterized by NMR experiments.

The obtained NMR data are consistent to those listed for compound **11** (see above).

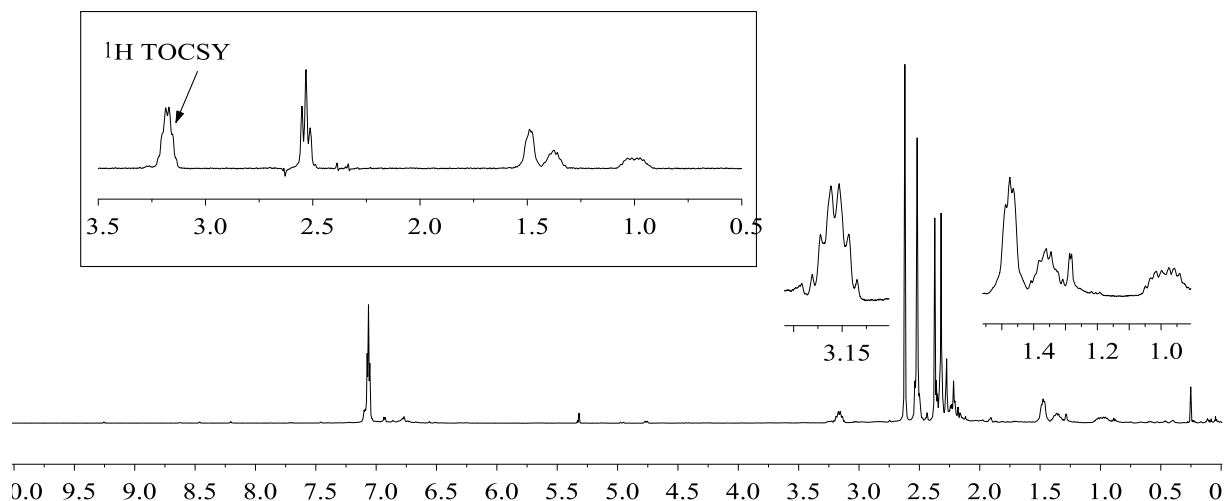

**<sup>1</sup>H NMR** (500 MHz, 299 K, CD<sub>2</sub>Cl<sub>2</sub>) and **<sup>1</sup>H{<sup>1</sup>H} TOCSY** (500 MHz, 299 K, CD<sub>2</sub>Cl<sub>2</sub>) spectra of compound **11** (irradiation (arrow) at 3.16 ppm, response at 2.52, 1.47, 1.36, 0.98 ppm).

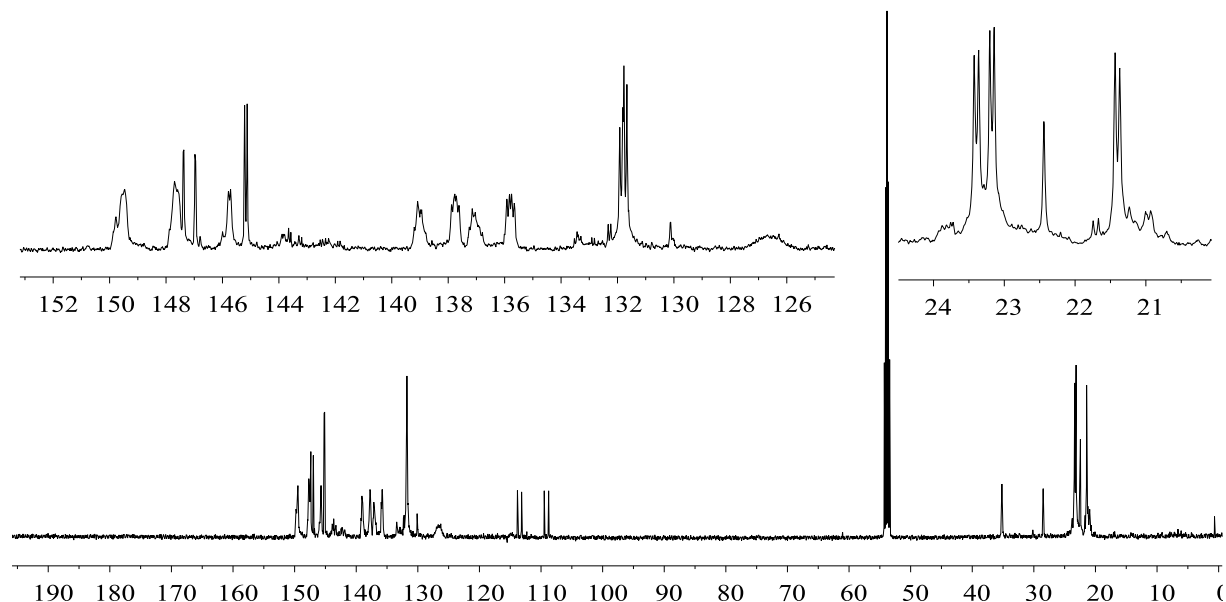

**<sup>13</sup>C{<sup>1</sup>H} NMR** (126 MHz, 299 K, CD<sub>2</sub>Cl<sub>2</sub>) spectrum of compound **11**.

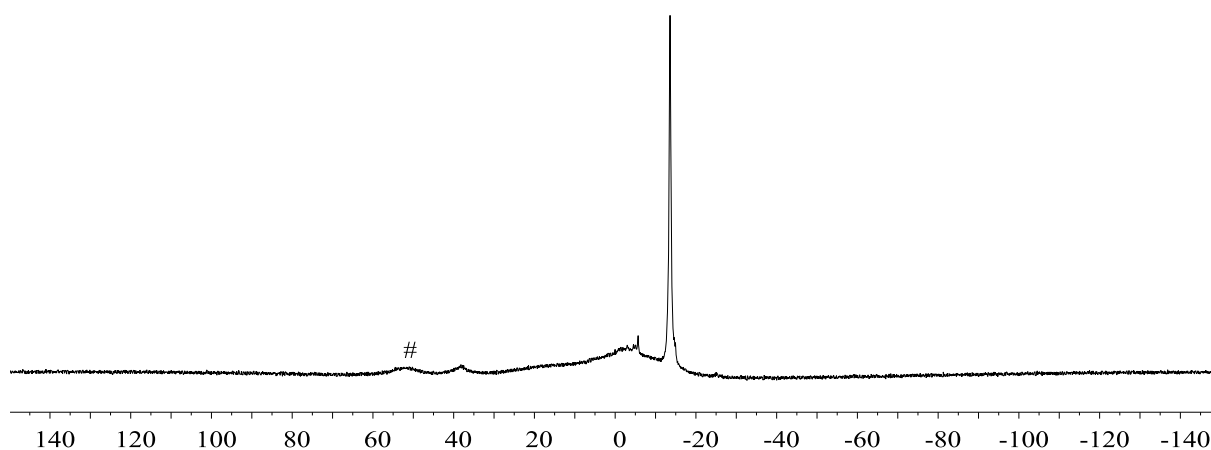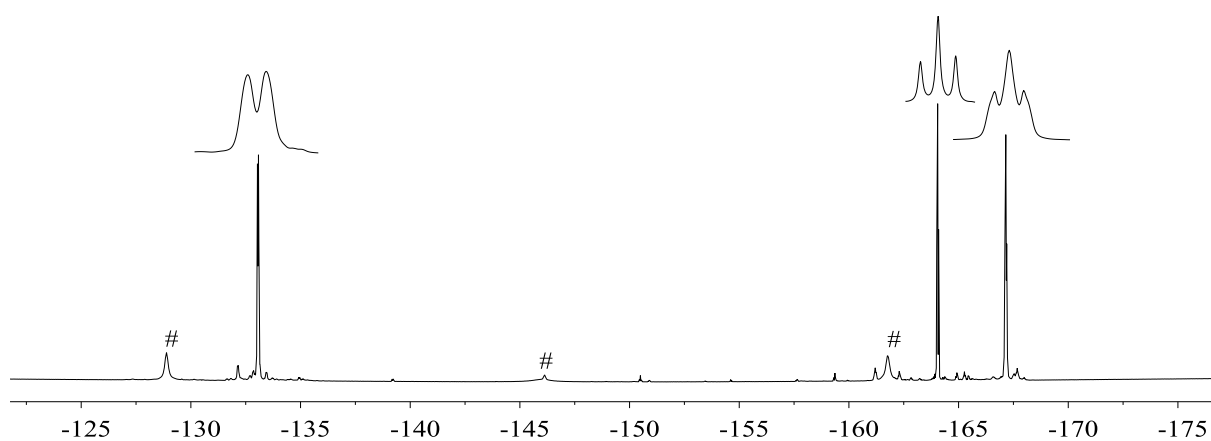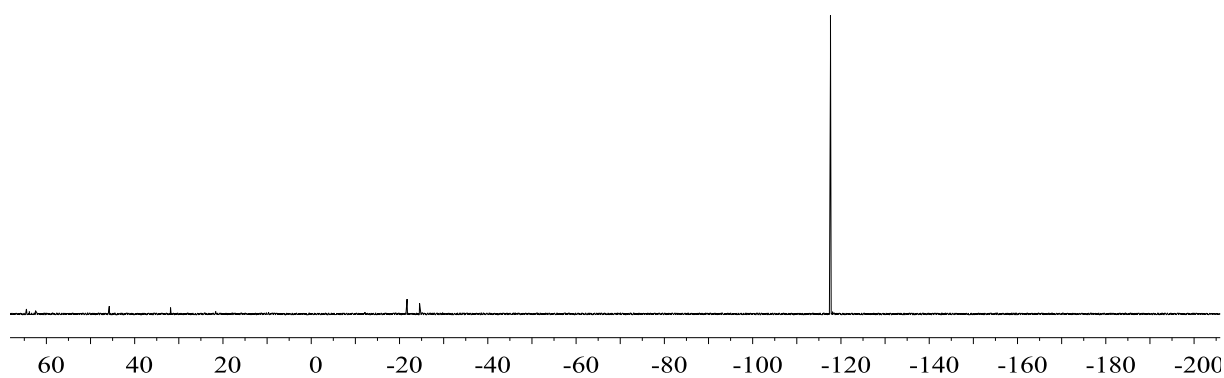

**Reaction of compound 11 with benzaldehyde: formation of adduct 12 and compound 9.**

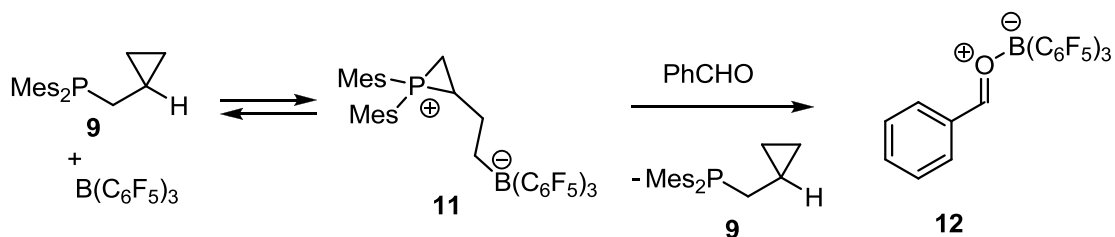

Phosphane **9** (100 mg, 0.308 mmol) and  $\text{B}(\text{C}_6\text{F}_5)_3$  (158 mg, 0.308 mmol) were stirred in *n*-pentane (3 mL) for 30 min, then benzaldehyde (33 mg, 0.308 mmol) was added at room temperature. The formation of a white solid was observed. The suspension was stirred for further 16 h. Then all volatiles were removed *in vacuo* giving a viscous white residue (190 mg).

The NMR spectra of the viscous white residue in  $\text{CD}_2\text{Cl}_2$  show a mixture of compound **9** and the benzaldehyde borane adduct **12** [For a comparison see: D. J. Parks, W. E. Piers, M. Parvez, R. Atencio and M. J. Zavorotko, *Organometallics*, 1998, **17**, 1369; D. J. Morrison and W. E. Piers, *Org. Lett.*, 2003, **5**, 2857].

The NMR data of compound **9** were consistent with those listed above.

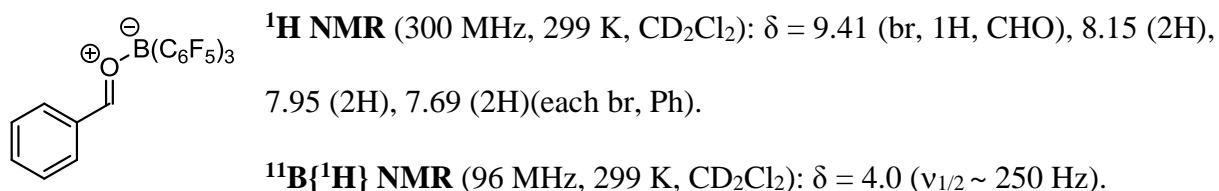

**$^{19}\text{F}\{^1\text{H}\}$  NMR** (282 MHz, 299 K,  $\text{CD}_2\text{Cl}_2$ ):  $\delta$  = -134.1 (br, 2F, *o*- $\text{C}_6\text{F}_5$ ), -156.3 (br, 1F, *p*- $\text{C}_6\text{F}_5$ ), -163.9 (br, 2F, *m*- $\text{C}_6\text{F}_5$ ). [ $\Delta\delta^{19}\text{F}_{\text{m,p}} = 7.5$ ].

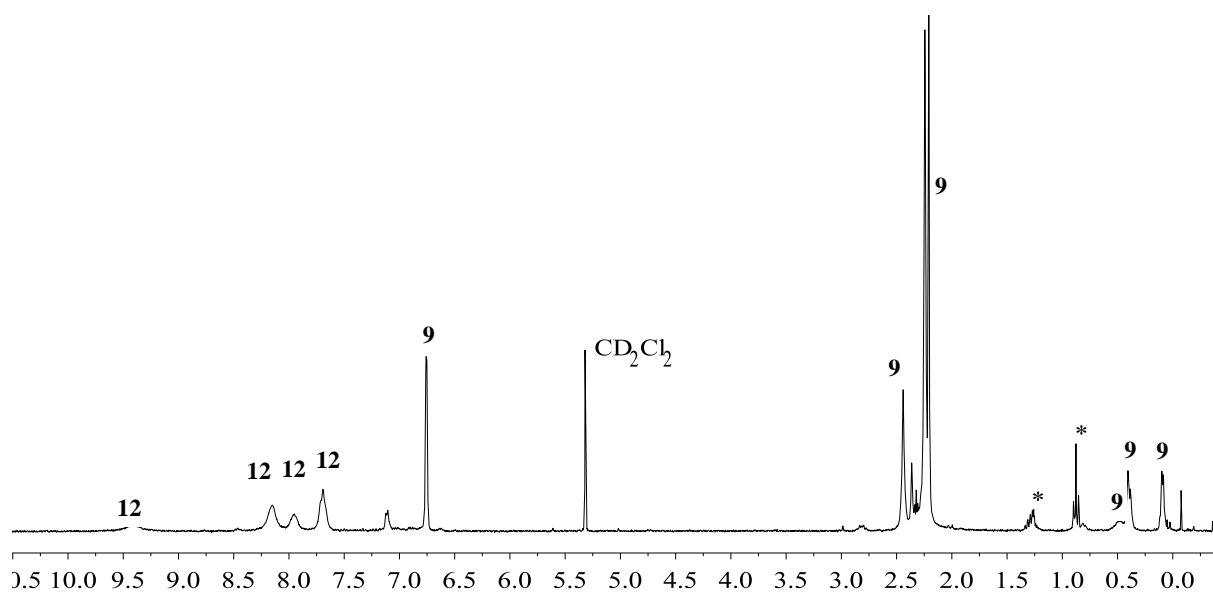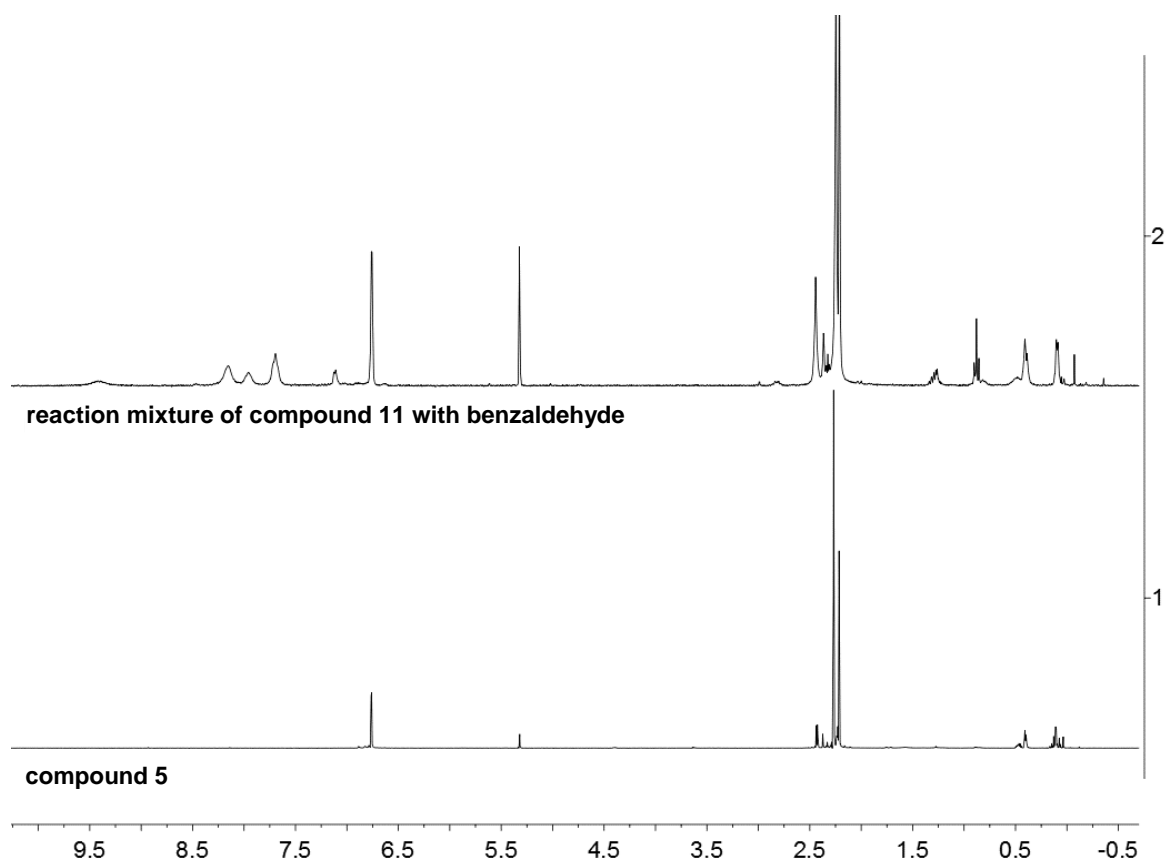

(1) <sup>1</sup>H NMR (600 MHz, 299 K, CD<sub>2</sub>Cl<sub>2</sub>) spectrum of compound **9**; (2) <sup>1</sup>H NMR (300 MHz, 299 K, CD<sub>2</sub>Cl<sub>2</sub>) spectrum of the reaction mixture of the reaction of compound **11** with benzaldehyde: mixture of compounds **12** and **9**.

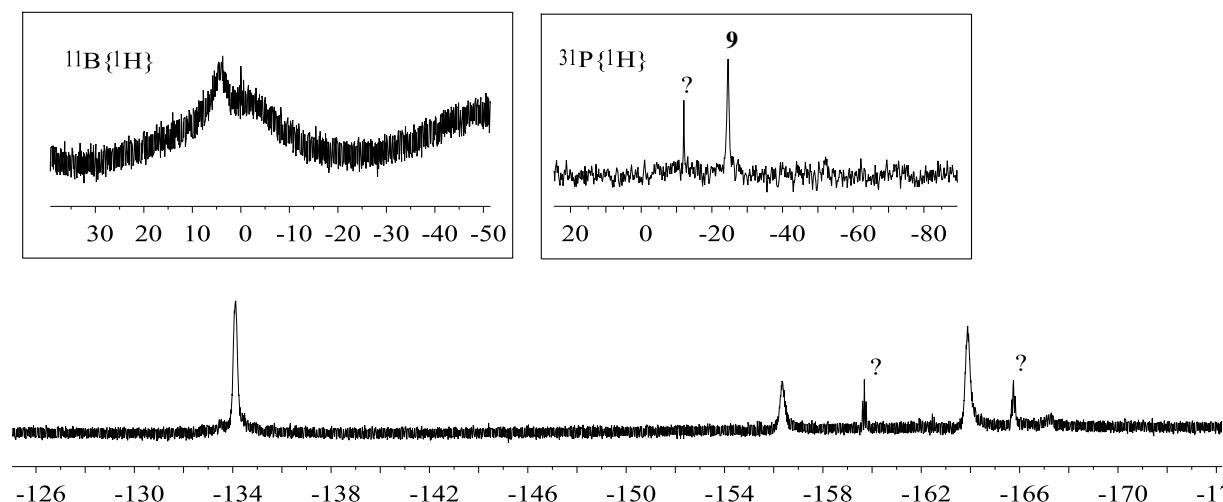

$^{19}\text{F}$  NMR (282 MHz, 299 K,  $\text{CD}_2\text{Cl}_2$ ),  $^{11}\text{B}\{^1\text{H}\}$  NMR (96 MHz, 299 K,  $\text{CD}_2\text{Cl}_2$ ) and  $^{31}\text{P}\{^1\text{H}\}$  NMR (121 MHz, 299 K,  $\text{CD}_2\text{Cl}_2$ ) spectra of the reaction mixture of the reaction of compound **11** with benzaldehyde: mixture of compounds **12** and **9**. [? not identified compound].

After storing the viscous white residue for ca. 4 days at  $-30\text{ }^\circ\text{C}$  a few colorless crystals suitable for the X-ray structure analysis were obtained.

**X-Ray crystal structure analysis of compound 12** formula  $\text{C}_{25}\text{H}_6\text{BF}_{15}\text{O}$ ,  $M = 618.11$ , colourless crystal,  $0.283 \times 0.251 \times 0.113\text{ mm}$ ,  $a = 9.4516(4)$ ,  $b = 12.1427(5)$ ,  $c = 12.2399(4)\text{ \AA}$ ,  $\alpha = 110.414(1)$ ,  $\beta = 100.070(1)$ ,  $\gamma = 97.111(1)^\circ$ ,  $V = 1267.0(1)\text{ \AA}^3$ ,  $\rho_{\text{calc}} = 1.616\text{ g cm}^{-3}$ ,  $\mu = 0.174\text{ mm}^{-1}$ , empirical absorption correction ( $0.952 \leq T \leq 0.981$ ),  $Z = 2$ , triclinic, space group  $P\bar{1}$  (No. 2),  $\lambda = 0.71073\text{ \AA}$ ,  $T = 100(2)\text{ K}$ ,  $\omega$  and  $\varphi$  scans, 51651 reflections collected, 5853 independent ( $R_{\text{int}} = 0.047$ ) and 4788 observed reflections [ $I > 2\sigma(I)$ ], 379 refined parameters,  $R = 0.036$ ,  $wR^2 = 0.097$ , max. (min.) residual electron density  $0.37\text{ }(-0.26)\text{ e.\AA}^{-3}$ , hydrogen atoms were calculated and refined as riding atoms.

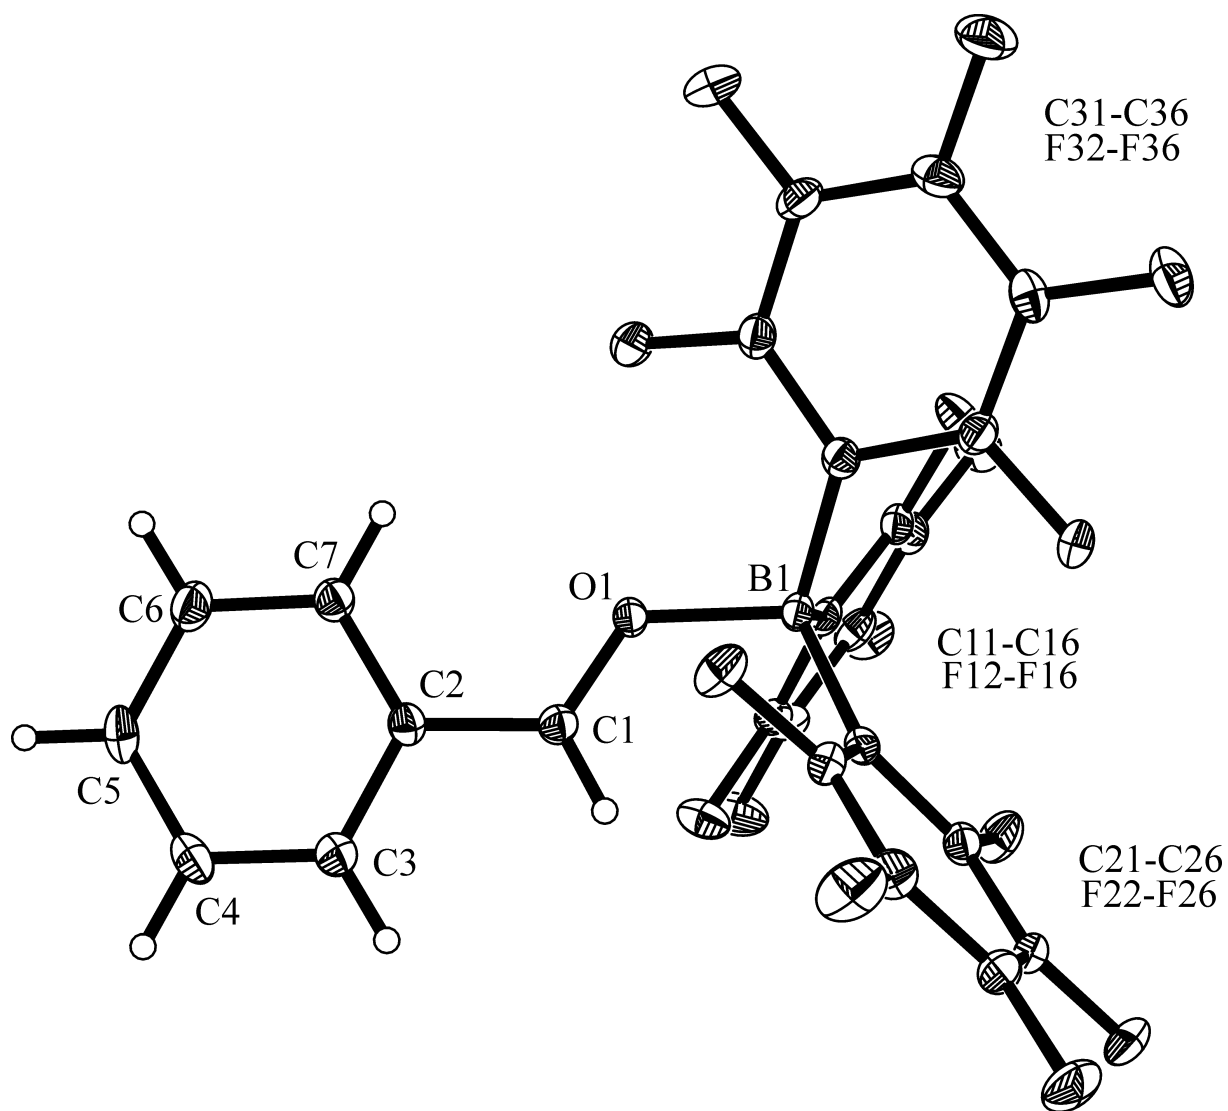

### Preparation of compound 13.

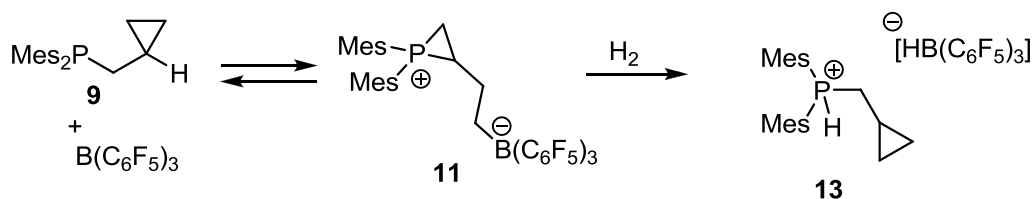

Phosphane **9** (100 mg, 0.308 mmol) and  $\text{B}(\text{C}_6\text{F}_5)_3$  (158 mg, 0.308 mmol) were dissolved in *n*-pentane (2 mL). Then, after 30 min, the solution was exposed to an  $\text{H}_2$  atmosphere (2 bar). The reaction mixture was stirred and the yellow solution turned colorless after 20 min and stirring was continued at ambient temperature for 16 h. The solvent of the obtained emulsion was removed and the separated oil was dried *in vacuo* giving a white foam (249 mg, 96%).

**Elemental analysis:** Calcd. for  $\text{C}_{40}\text{H}_{31}\text{BF}_{15}\text{P}$ : C, 57.30; H, 3.73. Found: C, 56.64; H, 3.61.

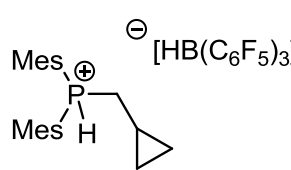  **$^1\text{H}$  NMR** (400 MHz, 299 K,  $\text{CD}_2\text{Cl}_2$ ):  $\delta$  = 7.71 (dt,  $^1J_{\text{PH}}$  = 476.0 Hz,  $^3J_{\text{HH}}$  = 7.1 Hz, 1H, PH), 7.09 (dm,  $^4J_{\text{PH}}$  = 4.8 Hz, 4H, *m*-Mes), 3.58 (br q 1:1:1:1,  $^1J_{\text{BH}}$  ~ 95 Hz, 1H, BH), 2.83 (dt,  $^2J_{\text{PH}}$  = 11.2 Hz,  $^3J_{\text{HH}}$  = 7.0 Hz, 2H,  $\text{PCH}_2$ ), 2.43 (s, 12H, *o*- $\text{CH}_3^{\text{Mes}}$ ), 2.35 (s, 6H, *p*- $\text{CH}_3^{\text{Mes}}$ ), 0.89 (m, 1H, CH), 0.78, 0.39 (each m, each 2H,  $\text{CH}_2$ ).

**$^{13}\text{C}\{^1\text{H}\}$  NMR** (101 MHz, 299 K,  $\text{CD}_2\text{Cl}_2$ ):  $\delta$  = 148.5 (dm,  $^1J_{\text{FC}}$  ~ 235 Hz,  $\text{C}_6\text{F}_5$ ), 147.3 (d,  $^4J_{\text{PC}}$  = 2.9 Hz, *p*-Mes), 143.5 (d,  $^2J_{\text{PC}}$  = 10.3 Hz, *o*-Mes), 138.1 (dm,  $^1J_{\text{FC}}$  ~ 245 Hz,  $\text{C}_6\text{F}_5$ ), 136.8 (dm,  $^1J_{\text{FC}}$  ~ 245 Hz,  $\text{C}_6\text{F}_5$ ), 132.5 (d,  $^3J_{\text{PC}}$  = 11.4 Hz, *m*-Mes), 125.7 (br, *i*- $\text{C}_6\text{F}_5$ ), 111.1 (d,  $^1J_{\text{PC}}$  = 80.0 Hz, *i*-Mes), 31.1 (d,  $^1J_{\text{PC}}$  = 43.5 Hz,  $\text{PCH}_2$ ), 22.3 (d,  $^3J_{\text{PC}}$  = 7.4 Hz, *o*- $\text{CH}_3^{\text{Mes}}$ ), 21.4 (d,  $^4J_{\text{PC}}$  = 1.5 Hz, *p*- $\text{CH}_3^{\text{Mes}}$ ), 7.1 (d,  $^3J_{\text{PC}}$  = 10.2 Hz,  $\text{CH}_2$ ), 7.0 (d,  $^2J_{\text{PC}}$  = 2.5 Hz, CH).

**$^1\text{H}, ^1\text{H}$  GCOSY** (400 MHz/ 400 MHz, 299 K,  $\text{CD}_2\text{Cl}_2$ ) [selected trace]:  $\delta^1\text{H}/\delta^1\text{H}$  = 0.89/ 2.83, 0.89, 0.78 (CH/  $\text{PCH}_2$ ,  $\text{CH}_2$ ,  $\text{CH}_2$ ).

**$^1\text{H}$ ,  $^{13}\text{C}$  GHSQC** (400 MHz/ 101 MHz, 299 K,  $\text{CD}_2\text{Cl}_2$ ):  $\delta^1\text{H}/ \delta^{13}\text{C} = 7.09/ 132.5$  (*m*-Mes), 2.83/ 31.1 ( $\text{PCH}_2$ ), 2.43/ 22.3 (*o*- $\text{CH}_3^{\text{Mes}}$ ), 2.35/ 21.4 (*p*- $\text{CH}_3^{\text{Mes}}$ ), 0.89/ 7.0 ( $\text{CH}$ ), 0.78/ 7.2 ( $\text{CH}_2$ ), 0.39/ 7.2 ( $\text{CH}_2$ ).

**$^1\text{H}$ ,  $^{13}\text{C}$  GHMBC** (400 MHz/ 101 MHz, 299 K,  $\text{CD}_2\text{Cl}_2$ ) [selected traces]:  $\delta^1\text{H}/ \delta^{13}\text{C} = 7.71 / 143.5$ , 111.1, 31.1, 7.0 ( $\text{PH}/ o\text{-Mes}, i\text{-Mes}, \text{PCH}_2, \text{CH}$ ), 7.09/ 132.5, 111.1, 22.3, 21.4 (*m*-Mes, *i*-Mes, *o*- $\text{CH}_3^{\text{Mes}}$ , *p*- $\text{CH}_3^{\text{Mes}}$ ), 2.35/ 147.3, 132.5 (*p*- $\text{CH}_3^{\text{Mes}}/ p\text{-Mes}, m\text{-Mes}).$

**$^{11}\text{B}\{^1\text{H}\}$  NMR** (96 MHz, 299 K,  $\text{CD}_2\text{Cl}_2$ ):  $\delta = -25.4$  ( $\nu_{1/2} \sim 45$  Hz).

**$^{11}\text{B}$  NMR** (96 MHz, 299 K,  $\text{CD}_2\text{Cl}_2$ ):  $\delta = -25.4$  (d,  $^1J_{\text{BH}} \sim 93$  Hz).

**$^{19}\text{F}\{^1\text{H}\}$  NMR** (282 MHz, 299 K,  $\text{CD}_2\text{Cl}_2$ ):  $\delta = -133.9$  (m, 2F, *o*- $\text{C}_6\text{F}_5$ ), -164.6 (t,  $J = 20.2$  Hz, 1F, *p*- $\text{C}_6\text{F}_5$ ), -167.5 (m, 2F, *m*- $\text{C}_6\text{F}_5$ ). [ $\Delta\delta^{19}\text{F}_{\text{m,p}} = 2.9$ ].

**$^{31}\text{P}\{^1\text{H}\}$  NMR** (121 MHz, 299 K,  $\text{CD}_2\text{Cl}_2$ ):  $\delta -12.2$  ( $\nu_{1/2} \sim 2$  Hz).

**$^{31}\text{P}$  NMR** (121 MHz, 299 K,  $\text{CD}_2\text{Cl}_2$ ):  $\delta -12.2$  (dm,  $^1J_{\text{PH}} \sim 477$  Hz).

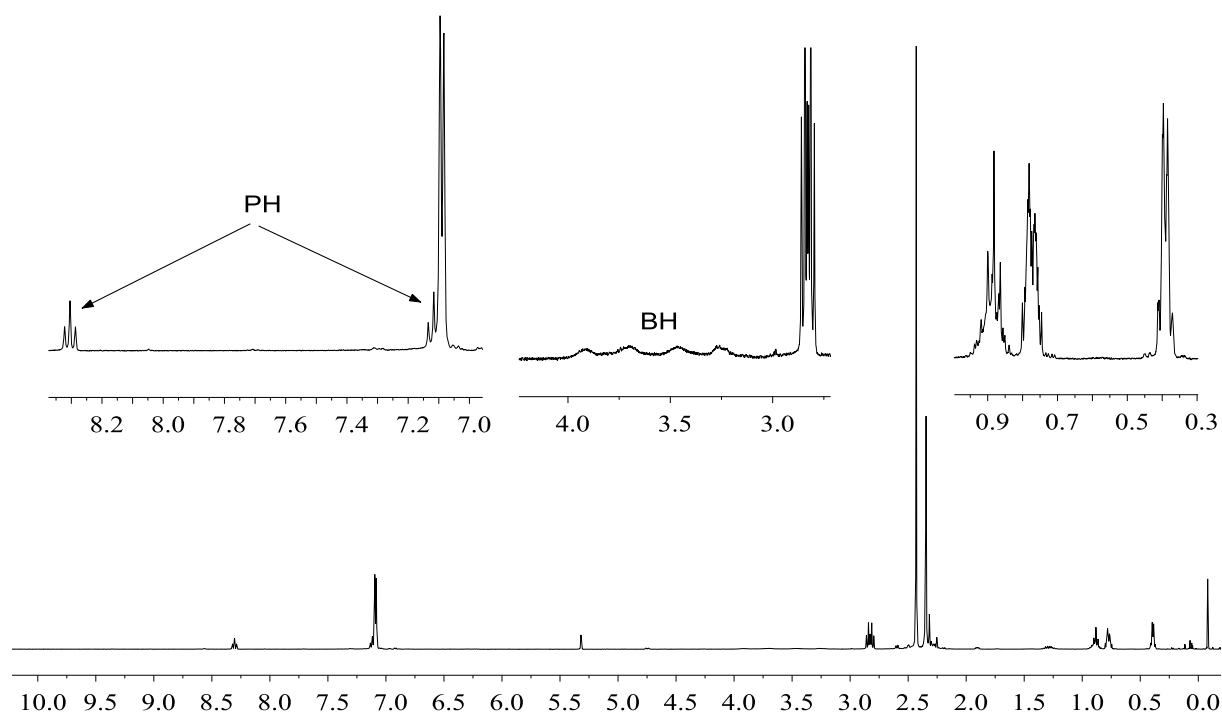

**$^1\text{H}$  NMR** (400 MHz, 299 K,  $\text{CD}_2\text{Cl}_2$ ) spectrum of compound **13**.

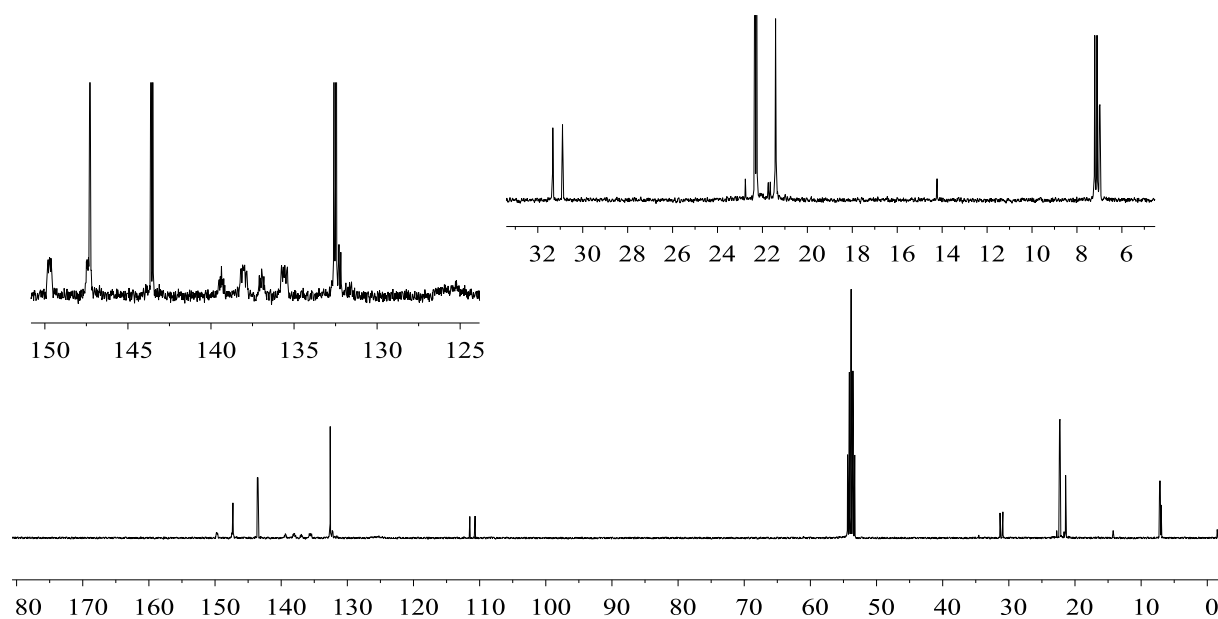

$^{13}\text{C}\{^1\text{H}\}$  NMR (101 MHz, 299 K,  $\text{CD}_2\text{Cl}_2$ ) spectrum of compound **13**.

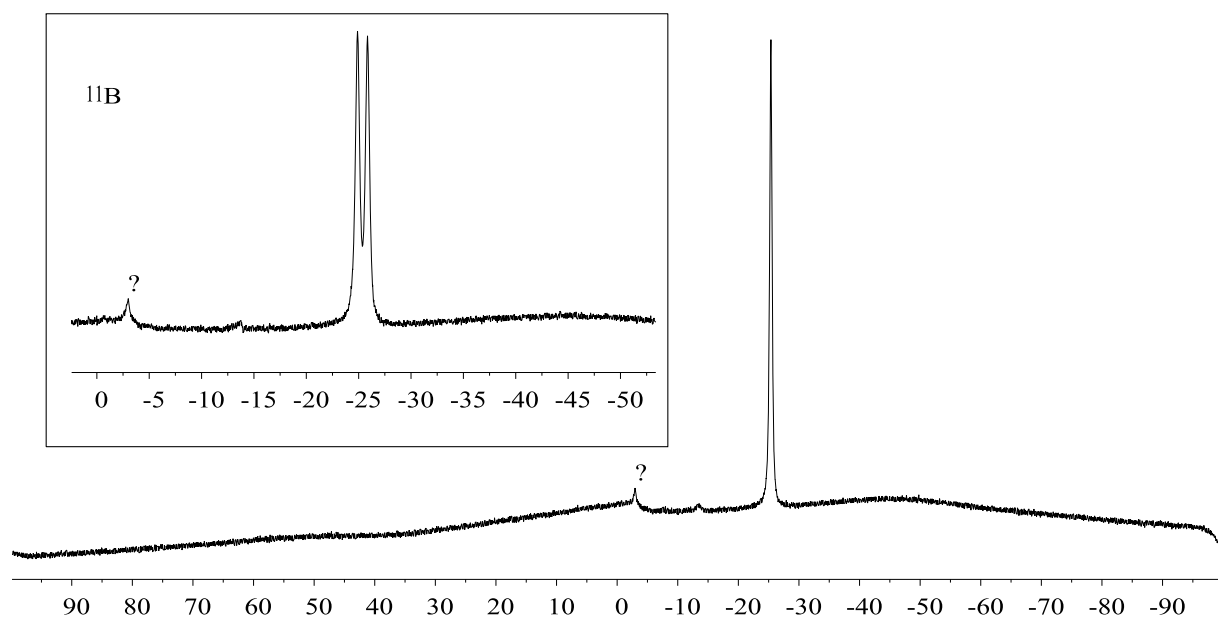

$^{11}\text{B}\{^1\text{H}\}$  NMR (96 MHz, 299 K,  $\text{CD}_2\text{Cl}_2$ ) and  $^{11}\text{B}$  NMR (96 MHz, 299 K,  $\text{CD}_2\text{Cl}_2$ ) spectra of compound **13**. [? not identified compound].

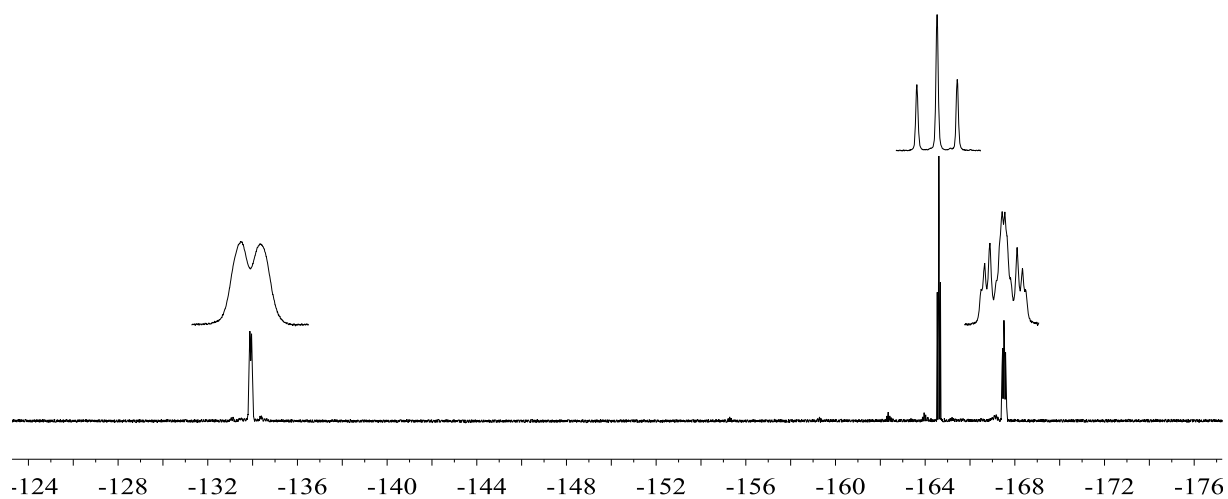

**$^{19}\text{F}$  NMR** (282 MHz, 299 K,  $\text{CD}_2\text{Cl}_2$ ) spectrum of compound **13**.

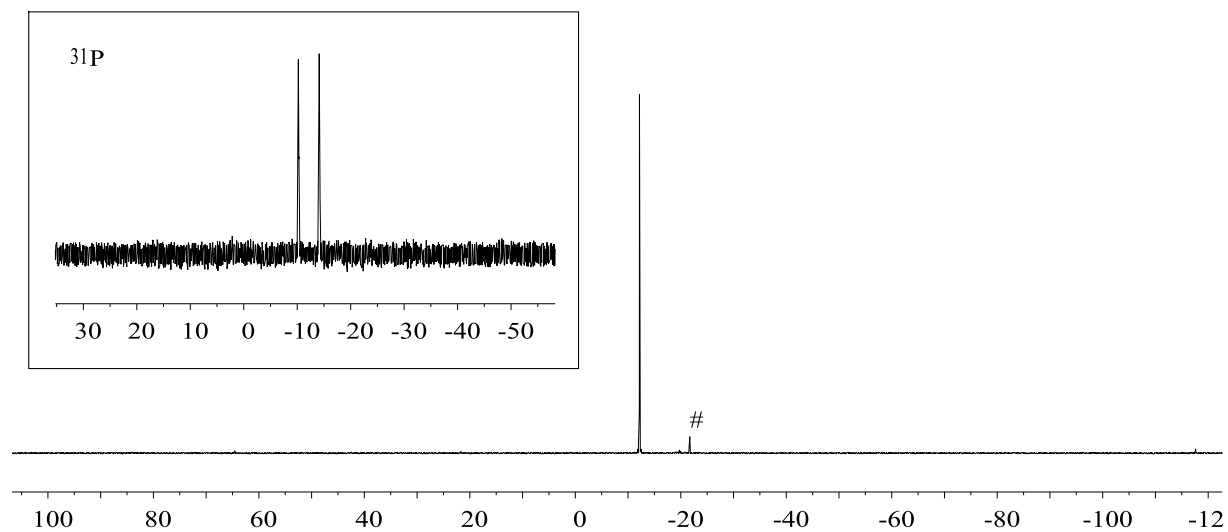

**$^{31}\text{P}\{^1\text{H}\}$  NMR** (121 MHz, 299 K,  $\text{CD}_2\text{Cl}_2$ ) and  **$^{31}\text{P}$  NMR** (121 MHz, 299 K,  $\text{CD}_2\text{Cl}_2$ ) spectra of compound **13**. [# compound **9**].
